# Supplementary material
Source: publisher figshare collection journal article supplement (https://acs.figshare.com/ndownloader/files/10283088)
Supplement: Supplementary file 1 [file 10283088]

# **1,6-Addition of Tertiary Carbon Radicals Generated From Alcohols or Carboxylic Acids by Visible-Light Photoredox Catalysis**

Samir Y. Abbas, Peng Zhao, and Larry E. Overman\*

*Department of Chemistry, University of California, Irvine, California 92697-2025*

## **Supporting Information – Table of Contents**

|                                     |                |
|-------------------------------------|----------------|
| <b>Materials and Methods.....</b>   | <b>S1</b>      |
| <b>Experimental Procedures.....</b> | <b>S2–S19</b>  |
| <b>NMR Spectra.....</b>             | <b>S20–S70</b> |
| <b>References.....</b>              | <b>S71</b>     |

## Materials and Methods.

Unless stated otherwise, reactions were conducted in oven-dried glassware under an atmosphere of nitrogen or argon using anhydrous solvents (either freshly distilled or passed through activated alumina columns). For all photoredox reactions, solvents were sparged with argon for five minutes prior to use. All commercially obtained reagents were used as received.  $[\text{Ir}(\text{dF}(\text{CF}_3)\text{ppy})_2(\text{dtbpy})]\text{PF}_6$ ,<sup>1</sup> Hemioxalate salts,<sup>1</sup> and ethyl (*E*)-penta-2,4-dienoate,<sup>2</sup> methyl (*E*)-penta-2,4-dienoate,<sup>2</sup> (*E*)-hexa-3,5-dien-2-one,<sup>3</sup> methyl (*E*)-2-methylpenta-2,4-dienoate,<sup>4</sup> (*E*)-5-methylhexa-3,5-dien-2-one,<sup>5</sup> methyl (*E*)-2,4-dimethylpenta-2,4-dienoate,<sup>6</sup> dimethyl (*E*)-2-(but-2-en-1-ylidene)malonate,<sup>7</sup> 3-vinylcyclopent-2-en-1-one,<sup>8</sup> and 3-vinylcyclohex-2-en-1-one<sup>9</sup> were prepared according to literature procedures. Reaction temperatures were controlled using an IKAmag temperature modulator. Thin-layer chromatography (TLC) was conducted with E. Merck silica gel 50 F254 pre-coated plates, (0.25 mm), and visualized by exposure to UV light (254 nm) and potassium permanganate staining. EMD silica gel 60 (particle size 0.040–0.063 mm) was used for flash column chromatography. <sup>1</sup>H NMR spectra were recorded on Bruker spectrometers (at 500 or 600 MHz) and are reported relative to deuterated solvent signals. Data for <sup>1</sup>H NMR spectra are reported as follows: chemical shift ( $\delta$  ppm), multiplicity, coupling constant (Hz) and integration. High-resolution mass spectra were obtained from UC Irvine Mass Spectrometry Facility with a Micromass LCT spectrometer. Kessil KSH150B 34 W LED Grow Light 150, Blue LEDs were purchased from <http://www.amazon.com>.

**Safety Note:** Blue light from high-intensity LEDs can be damaging to eyesight. It is important that the reaction setup be surrounded by an appropriate shield to protect researchers from exposure to the light from the LED lamps. Researchers should wear blue-light blocking safety glasses, such as Uvex Skyper Blue Computer Blocking Glasses (model #: S1933X), when the lamps are in operation.

### General procedure for the coupling of an oxalate salt with a 1,3-diene:

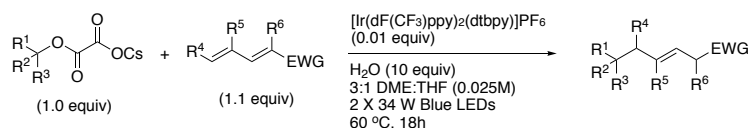

An 8 mL-scintillation vial equipped with a Teflon septum and a magnetic stir bar was charged with the oxalate salt (0.1 mmol, 1.0 equiv) and  $[\text{Ir}(\text{dF}(\text{CF}_3)\text{ppy})_2(\text{dtbbpy})]\text{PF}_6$  (1.1 mg, 0.001 mmol, 0.01 equiv). A 3:1 mixture of DME/THF (4 mL, 0.025 M) was added, followed by water (18  $\mu\text{L}$ , 1.0 mmol, 10 equiv), and the 1,3-diene (0.11 mmol, 1.1 equiv). The reaction mixture was degassed by sparging with argon for 10 min, and the vial was sealed and irradiated (2 x 34 W blue LED lamps) for 18 h with the reaction temperature rising to 60  $^\circ\text{C}$  because of heat given off from the LEDs. The reaction mixture was diluted with water (10 mL) and the aqueous phase was extracted with  $\text{Et}_2\text{O}$  (3 x 10 mL). The combined ethereal extracts were washed with brine (10 mL), dried over  $\text{Na}_2\text{SO}_4$  and concentrated. The crude material was purified by flash column chromatography on silica gel to yield corresponding addition products. In some cases, the product contained trace amounts of the *Z* stereoisomer, which had not been removed by chromatographic purification.<sup>10</sup> Results of these experiments are summarized in Schemes 2 and 3 of the publication.

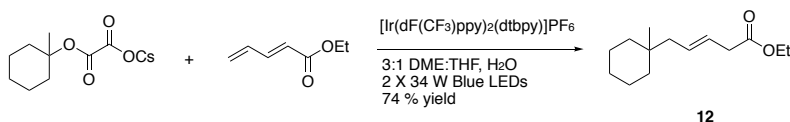

**Ethyl (*E*)-5-(1-methylcyclohexyl)pent-3-enoate (12):** According to the general procedure, cesium oxalate **10** (35 mg, 0.1 mmol, 1.0 equiv) was used as the radical precursor and ethyl (*E*)-penta-2,4-dienoate (**11**) (14 mg, 0.11 mmol, 1.1 equiv) was used

the acceptor. The crude residue was purified by flash chromatography (50:1 hexanes/EtOAc) to yield ethyl ester **12** (17 mg, 74%) as a pale yellow oil.<sup>10</sup>  $R_f$  0.2 (50:1 hexanes/EtOAc); visualized with  $\text{KMnO}_4$ .  $^1\text{H}$  NMR (600 MHz,  $\text{CDCl}_3$ )  $\delta$  5.59 – 5.54 (m, 1H), 5.52 – 5.47 (m, 1H), 4.12 (q,  $J = 7.2$  Hz, 2H), 3.02 (dd,  $J = 7.2, 1.2$  Hz, 2H), 1.94 (d,  $J = 7.2$  Hz, 2H), 1.43 – 1.39 (m, 5H), 1.26 – 1.20 (m, 8H), 0.83 (s, 3H);  $^{13}\text{C}$  NMR (151 MHz,  $\text{CDCl}_3$ )  $\delta$  172.3, 131.3, 124.0, 60.6, 45.0, 38.5, 37.8, 33.4, 26.6, 25.2, 22.2, 14.4; IR (thin film) 2925, 2860, 1744, 1450, 1249  $\text{cm}^{-1}$ ; HRMS (ESI/TOF)  $m/z$  calculated for  $\text{C}_{14}\text{H}_{24}\text{O}_2$   $[\text{M} + \text{Na}]^+$  247.1674, observed 247.1680.

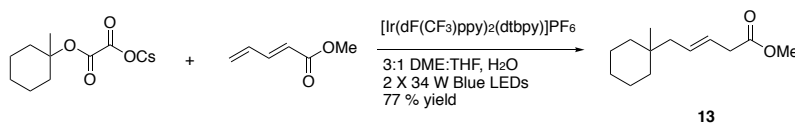

**Methyl (*E*)-5-(1-methylcyclohexyl)pent-3-enoate (**13**):** According to the general procedure, cesium oxalate **10** (35 mg, 0.1 mmol, 1.0 equiv) was used as the radical precursor and methyl (*E*)-penta-2,4-dienoate (12 mg, 0.11 mmol, 1.1 equiv) was used the acceptor. The crude residue was purified by flash chromatography (50:1 hexanes/EtOAc) to yield methyl ester **13** (16 mg, 77%) as a pale yellow oil.<sup>10</sup>  $R_f$  0.2 (50:1 hexanes/EtOAc); visualized with  $\text{KMnO}_4$ .  $^1\text{H}$  NMR (600 MHz,  $\text{CDCl}_3$ )  $\delta$  5.61 – 5.56 (m, 1H), 5.54 – 5.49 (m, 1H), 3.69 (s, 3H), 3.06 (d,  $J = 6.8$  Hz, 2H), 1.96 (d,  $J = 7.2$  Hz, 2H), 1.47 – 1.40 (m, 5H), 1.32 – 1.20 (m, 5H), 0.85 (s, 3H);  $^{13}\text{C}$  NMR (151 MHz,  $\text{CDCl}_3$ )  $\delta$  172.9, 131.6, 123.8, 51.9, 45.0, 38.2, 37.8, 33.5, 26.6, 25.3, 22.2; IR (thin film) 2924, 2847, 1747, 1436, 1251  $\text{cm}^{-1}$ ; HRMS (ESI/TOF)  $m/z$  calculated for  $\text{C}_{13}\text{H}_{22}\text{O}_2$   $[\text{M} + \text{H}]^+$  211.1698, observed 211.1698.

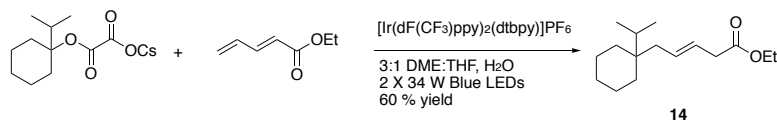

**Ethyl (*E*)-5-(1-isopropylcyclohexyl)pent-3-enoate (**14**):** According to the general procedure, the cesium oxalate (35 mg, 0.1 mmol, 1.1 equiv) was used as the radical precursor and ethyl (*E*)-penta-2,4-dienoate (**11**) (14 mg, 0.11 mmol, 1.1 equiv) was used



the acceptor. The crude residue was purified by flash chromatography (50:1 hexanes/EtOAc) to yield ethyl ester **14** (15 mg, 60% yield) as a pale yellow oil.  $R_f$  0.2 (40:1 hexanes/EtOAc); visualized with  $\text{KMnO}_4$ .  $^1\text{H}$  NMR (600 MHz,  $\text{CDCl}_3$ )  $\delta$  5.59 – 5.50 (m, 2H), 4.14 (q,  $J = 7.2$  Hz, 2H), 3.04 (d,  $J = 6.0$  Hz, 2H), 2.09 (d,  $J = 7.2$  Hz, 2H), 1.70 (sept,  $J = 6.6$  Hz, 1H), 1.47 – 1.41 (m, 5H), 1.35 – 1.24 (m, 8H), 0.83 (d,  $J = 6.6$  Hz, 6H);  $^{13}\text{C}$  NMR (151 MHz,  $\text{CDCl}_3$ )  $\delta$  172.4, 131.9, 123.6, 60.7, 38.6, 37.8, 36.0, 32.2, 31.7, 26.6, 21.7, 16.9, 14.4; IR (thin film) 2928, 2863, 1741, 1455, 1369  $\text{cm}^{-1}$ ; HRMS (ESI/TOF)  $m/z$  calculated for  $\text{C}_{16}\text{H}_{28}\text{O}_2$   $[\text{M} + \text{NH}_4]^+$  270.2433, observed 270.2428.

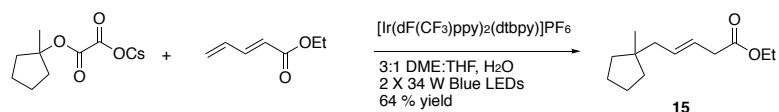

**Ethyl (E)-5-(1-methylcyclopentyl)pent-3-enoate (15):** According to the general procedure, the cesium oxalate (30 mg, 0.1 mmol, 1.0 equiv) was used as the radical precursor and ethyl (E)-penta-2,4-dienoate (**11**) (14 mg, 0.11 mmol, 1.1 equiv) was used the acceptor. The crude residue was purified by flash chromatography (50:1 hexanes/EtOAc) to yield ethyl ester **15** (14 mg, 64% yield) as a pale yellow oil.  $R_f$  0.2 (40:1 hexanes/EtOAc); visualized with  $\text{KMnO}_4$ .  $^1\text{H}$  NMR (600 MHz,  $\text{CDCl}_3$ )  $\delta$  5.61 – 5.56 (m, 1H), 5.54 – 5.50 (m, 1H), 4.14 (q,  $J = 7.2$  Hz, 2H), 3.04 (d,  $J = 6.6$  Hz, 2H), 2.02 (d,  $J = 7.2$  Hz, 2H), 1.63 – 1.59 (m, 4H), 1.43 – 1.40 (m, 2H), 1.30 – 1.25 (m, 5H), 0.92 (s, 3H);  $^{13}\text{C}$  NMR (151 MHz,  $\text{CDCl}_3$ )  $\delta$  172.4, 132.6, 123.7, 60.7, 45.1, 42.4, 39.1, 38.5, 26.6, 24.7, 14.4; IR (thin film) 2954, 2928, 2867, 1741, 1458  $\text{cm}^{-1}$ ; HRMS (ESI/TOF)  $m/z$  calculated for  $\text{C}_{13}\text{H}_{22}\text{O}_2$   $[\text{M} + \text{NH}_4]^+$  228.1964, observed 228.1956.

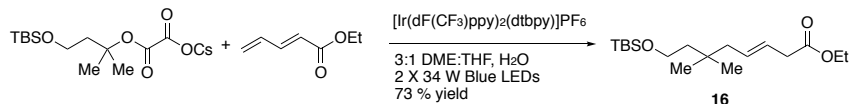

**Ethyl (E)-8-((tert-butyldimethylsilyl)oxy)-6,6-dimethyloct-3-enoate (16):** According to the general procedure, the cesium oxalate (42 mg, 0.1 mmol, 1.0 equiv) was used as the radical precursor and ethyl (E)-penta-2,4-dienoate (**11**) (14 mg, 0.11 mmol, 1.1 equiv)

was used the acceptor. The crude residue was purified by flash chromatography (100:1 hexanes/EtOAc) to yield ethyl ester **16** (24 mg, 73% yield) as a pale yellow oil.<sup>11</sup>  $R_f$  0.5 (50:1 hexanes/EtOAc); visualized with  $\text{KMnO}_4$ .  $^1\text{H}$  NMR (500 MHz,  $\text{CDCl}_3$ )  $\delta$  5.60 – 5.50 (m, 2H), 4.14 (q,  $J = 7.0$  Hz, 2H), 3.67 (t,  $J = 7.5$  Hz, 2H), 3.04 (d,  $J = 6.0$  Hz, 2H), 1.94 (d,  $J = 6.5$  Hz, 2H), 1.46 (t,  $J = 7.5$  Hz, 2H), 0.89 (s, 9H), 0.88 (s, 6H), 0.05 (s, 6H);  $^{13}\text{C}$  NMR (126 MHz,  $\text{CDCl}_3$ )  $\delta$  172.3, 131.5, 124.3, 60.7, 60.2, 45.7, 44.3, 38.5, 32.9, 27.5, 26.2, 18.5, 14.4, -5.1; IR (thin film) 2956, 2929, 2857, 1734, 1471  $\text{cm}^{-1}$ ; HRMS (ESI/TOF)  $m/z$  calculated for  $\text{C}_{18}\text{H}_{36}\text{O}_3\text{Si}$   $[\text{M} + \text{Na}]^+$  351.2332, observed 351.2326.

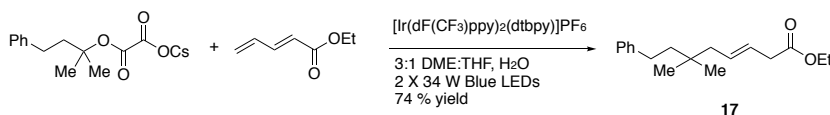

#### Preparation of Ethyl (*E*)-6,6-dimethyl-8-phenyloct-3-enoate (**17**) on 1 Mmol Scale:

According to the general procedure, the cesium oxalate (368 mg, 1 mmol, 1.0 equiv) was used as the radical precursor and ethyl (*E*)-penta-2,4-dienoate (**11**) (139 mg, 1.1 mmol, 1.1 equiv) was used the acceptor. The crude residue was purified by flash chromatography (100:1 hexanes/EtOAc) to yield ethyl ester **17** (203 mg, 74% yield) as a pale yellow oil.<sup>10</sup>  $R_f$  0.2 (100:1 hexanes/EtOAc); visualized with  $\text{KMnO}_4$ .  $^1\text{H}$  NMR (600 MHz,  $\text{CDCl}_3$ )  $\delta$  7.30 – 7.28 (m, 2H), 7.19 – 7.17 (m, 3H), 5.65 – 5.55 (m, 2H), 4.15 (q,  $J = 7.2$  Hz, 2H), 3.07 (d,  $J = 6.6$  Hz, 2H), 2.58 – 2.55 (m, 2H), 2.03 (d,  $J = 6.6$  Hz, 2H), 1.51 – 1.49 (m, 2H), 1.26 (t,  $J = 7.2$  Hz, 3H), 0.95 (s, 6H);  $^{13}\text{C}$  NMR (126 MHz,  $\text{CDCl}_3$ )  $\delta$  172.3, 143.6, 131.4, 128.5, 125.7, 124.3, 60.7, 45.0, 44.3, 38.5, 33.7, 30.9, 27.2, 27.1, 14.1; IR (thin film) 3026, 2957, 1744, 1469, 1366  $\text{cm}^{-1}$ ; HRMS (ESI/TOF)  $m/z$  calculated for  $\text{C}_{18}\text{H}_{26}\text{O}_2$   $[\text{M} + \text{Na}]^+$  297.1830, observed 297.1826.

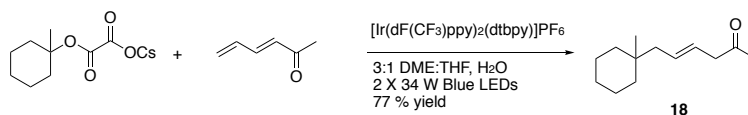

**(*E*)-6-(1-methylcyclohexyl)hex-4-en-2-one (18):** According to the general procedure, cesium oxalate **10** (35 mg, 0.1 mmol, 1.0 equiv) was used as the radical precursor and (*E*)-hexa-3,5-dien-2-one (11 mg, 0.11 mmol, 1.1 equiv) was used the acceptor. The crude residue was purified by flash chromatography (50:1 hexanes/EtOAc) to yield ketone **18** (15 mg, 0.077 mmol, 77% yield) as a pale yellow oil.<sup>10</sup>  $R_f$  0.6 (85:15 hexanes/EtOAc); visualized with KMnO<sub>4</sub>. <sup>1</sup>H NMR (600 MHz, CDCl<sub>3</sub>)  $\delta$  5.61 – 5.56 (m, 1H), 5.53 – 5.48 (m, 1H), 3.13 (d,  $J$  = 7.2 Hz, 2H), 2.16 (s, 3H), 1.98 (d,  $J$  = 7.2 Hz, 2H), 1.47 – 1.40 (m, 5H), 1.33 – 1.21 (m, 5H), 0.85 (s, 3H); <sup>13</sup>C NMR (151 MHz, CDCl<sub>3</sub>)  $\delta$  207.8, 132.1, 124.1, 48.1, 45.1, 37.8, 33.5, 29.5, 26.6, 25.4, 22.2; IR (thin film) 2935, 2859, 1718, 1450, 1356 cm<sup>-1</sup>; HRMS (ESI/TOF)  $m/z$  calculated for C<sub>13</sub>H<sub>22</sub>O [M + Na]<sup>+</sup> 217.1568, observed 217.1560.

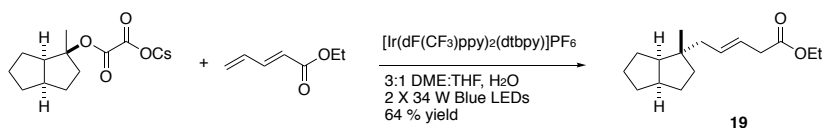

**Ethyl (*E*)-5-((1*S*,3*aR*,6*aR*)-1-methyloctahydropentalen-1-yl)pent-3-enoate (19):** According to the general procedure, the cesium oxalate (52 mg, 0.15 mmol, 1.0 equiv) was used as the radical precursor and ethyl (*E*)-penta-2,4-dienoate (21 mg, 0.165 mmol, 1.1 equiv) was used the acceptor. The crude residue was purified by flash chromatography (50:1 hexanes/EtOAc) to yield ethyl ester **19** (24 mg, 64% yield) as a pale yellow oil.  $R_f$  0.5 (90:10 hexanes/EtOAc); visualized with KMnO<sub>4</sub>. <sup>1</sup>H NMR (600 MHz, CDCl<sub>3</sub>)  $\delta$  5.61 – 5.56 (m, 1H), 5.53 – 5.48 (m, 1H), 4.14 (q,  $J$  = 7.1 Hz, 2 H), 3.04 (d,  $J$  = 6.5 Hz, 2H), 2.49 – 2.43 (m, 1H), 1.99 – 1.91 (m, 3H), 1.90 – 1.84 (m, 1H), 1.82 – 1.77 (m, 1H), 1.64 – 1.60 (m, 1H), 1.53 – 1.50 (m, 1H), 1.39 – 1.30 (m, 3H), 1.26 (t,  $J$  = 7.1 Hz, 3H), 1.24 – 1.18 (m, 2H), 1.15 – 1.10 (m, 1H), 0.90 (s, 3H); <sup>13</sup>C NMR (151 MHz, CDCl<sub>3</sub>)  $\delta$  172.3, 132.1, 123.6, 60.5, 53.5, 44.5, 44.4, 42.6, 38.4, 37.2, 35.3, 31.5, 29.2, 27.9, 21.6, 14.3; IR (thin film) 2941, 2862, 1736, 1159, 968 cm<sup>-1</sup>; HRMS (ESI/TOF)  $m/z$  calculated for C<sub>16</sub>H<sub>26</sub>O<sub>2</sub> [M + Na]<sup>+</sup> 273.1830, observed 273.1817.

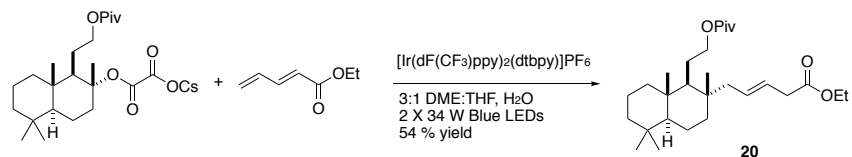

**Ethyl (E)-5-((1S,2S,4aS,8aS)-2,5,5,8a-tetramethyl-1-(2-(pivaloyloxy)ethyl)decahydronaphthalen-2-yl)pent-3-enoate (20):** According to the general procedure, the cesium oxalate (81 mg, 0.15 mmol, 1.0 equiv) was used as the radical precursor and ethyl (*E*)-penta-2,4-dienoate (21 mg, 0.165 mmol, 1.1 equiv) was used the acceptor. The crude residue was purified by flash chromatography (20:1 hexanes/EtOAc) to yield ethyl ester **20** (36 mg, 54% yield) as a pale yellow oil.<sup>10</sup> *R*<sub>f</sub> 0.6 (80:20 hexanes/EtOAc); visualized with KMnO<sub>4</sub>. <sup>1</sup>H NMR (600 MHz, CDCl<sub>3</sub>) δ 5.58 – 5.50 (m, 2H), 4.14 (q, *J* = 7.2 Hz, 2H), 4.03 – 3.99 (m, 1H), 3.95 – 3.91 (m, 1H), 3.04 (d, *J* = 5.7 Hz, 2H), 2.10 – 2.07 (m, 1H), 1.82 – 1.79 (m, 1H), 1.68 (app d, *J* = 12 Hz, 1 H), 1.60 – 1.47 (m, 5H), 1.43 – 1.30 (m, 3H), 1.27 (app t, *J* = 7.2 Hz, 4H), 1.20 (s, 9H), 1.16 – 1.09 (m, 1H), 0.86 – 0.84 (m, 7H) 0.82 (s, 3H), 0.80 – 0.78 (m, 4H), 0.71 (t, *J* = 3.7 Hz, 1H); <sup>13</sup>C NMR (151 MHz, CDCl<sub>3</sub>) δ 178.7, 172.1, 130.8, 124.7, 66.40, 60.6, 56.4, 55.8, 47.2, 42.1, 40.1, 39.6, 39.2, 38.7, 38.4, 38.1, 33.3, 27.3, 25.3, 21.6, 19.8, 18.6, 18.3, 16.1, 14.3; IR (thin film) 2931, 1726, 1282, 1152 cm<sup>-1</sup>; HRMS (ESI/TOF) *m/z* calculated for C<sub>28</sub>H<sub>48</sub>O<sub>4</sub> [M + Na]<sup>+</sup> 471.3450, observed 471.3450.

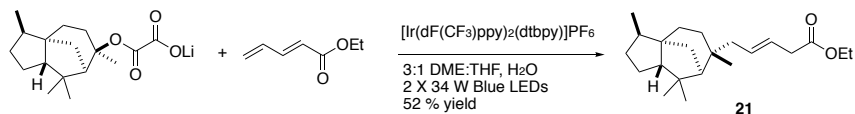

**Ethyl (E)-5-((3R,3aS,6R,7S,8aS)-3,6,8,8-tetramethyloctahydro-1H-3a,7-methanoazulen-6-yl)pent-3-enoate (21):** According to the general procedure, the lithium oxalate (45 mg, 0.15 mmol, 1.0 equiv) was used as the radical precursor and ethyl (*E*)-penta-2,4-dienoate (21 mg, 0.165 mmol, 1.1 equiv) was used the acceptor. The crude residue was purified by flash chromatography (50:1 hexanes/EtOAc) to yield ethyl ester **21** (26 mg, 52% yield) as a pale yellow oil. *R*<sub>f</sub> 0.5 (90:10 hexanes/EtOAc); visualized with KMnO<sub>4</sub>. <sup>1</sup>H NMR (600 MHz, CDCl<sub>3</sub>) δ 5.56 – 5.48 (m, 2H), 4.14 (q, *J* = 7.2 Hz, 2H), 3.04 (d, *J* = 5.4 Hz, 2H), 2.47 – 2.44 (m, 1H), 1.87 (sextet, *J* = 6.0 Hz, 1H), 1.76 – 1.70 (m, 2H), 1.65 – 1.56 (m, 3H), 1.53 – 1.45 (m, 3H), 1.39 – 1.32 (m, 4H), 1.28 – 1.24 (m, 2H), 1.26 (t, *J* = 7.2 Hz, 3H), 1.21 (s, 3H), 1.03 (s, 3H), 0.98 (s, 3H), 0.84 (d, *J* = 7.1

Hz, 3H);  $^{13}\text{C}$  NMR (151 MHz,  $\text{CDCl}_3$ )  $\delta$  172.3, 131.6, 123.7, 60.5, 57.6, 57.1, 53.6, 45.2, 44.3, 42.0, 39.9, 38.5, 38.1, 37.0, 33.6, 30.4, 29.8, 29.4, 27.0, 25.5, 15.5, 14.3; IR (thin film) 2935, 1738, 1462, 1157  $\text{cm}^{-1}$ ; HRMS (ESI/TOF)  $m/z$  calculated for  $\text{C}_{22}\text{H}_{36}\text{O}_2$   $[\text{M} + \text{Na}]^+$  355.2613, observed 355.2618.

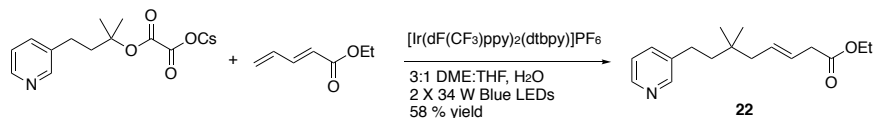

**Ethyl (*E*)-6,6-dimethyl-8-(pyridin-3-yl)oct-3-enoate (22):** According to the general procedure, the cesium oxalate (55 mg, 0.15 mmol, 1.0 equiv) was used as the radical precursor and ethyl (*E*)-penta-2,4-dienoate (21 mg, 0.165 mmol, 1.1 equiv) was used the acceptor. The crude residue was purified by flash chromatography (5:1 hexanes/EtOAc) to yield ethyl ester **22** (24mg, 58% yield) as a pale yellow oil.  $R_f$  0.2 (80:20 hexanes/EtOAc); visualized with  $\text{KMnO}_4$ .  $^1\text{H}$  NMR (600 MHz,  $\text{CDCl}_3$ )  $\delta$  8.44 (d,  $J$  = 1.8 Hz, 1H), 8.42 (dd,  $J$  = 4.8, 1.4 Hz, 1H), 7.48 (td,  $J$  = 7.6, 1.8 Hz, 1H), 7.19 (dd,  $J$  = 7.6, 4.8 Hz, 1H), 5.62 – 5.54 (m, 2H), 4.13 (q,  $J$  = 7.1 Hz, 2H), 3.06 (d,  $J$  = 5.4 Hz, 2H), 2.57 – 2.54 (m, 2H), 2.02 (d,  $J$  = 6.0 Hz, 2H), 1.49 – 1.46 (m, 2H), 1.24 (t,  $J$  = 7.1 Hz, 3H), 0.95 (s, 6H);  $^{13}\text{C}$  NMR (151 MHz,  $\text{CDCl}_3$ )  $\delta$  172.1, 149.9, 147.2, 135.8, 131.0, 124.4, 123.3, 60.6, 44.8, 43.8, 38.3, 33.6, 27.9, 20.1, 14.3; IR (thin film) 2954, 2906, 1732, 1172  $\text{cm}^{-1}$ ; HRMS (ESI/TOF)  $m/z$  calculated for  $\text{C}_{17}\text{H}_{25}\text{NO}_2$   $[\text{M} + \text{Na}]^+$  298.1783, observed 298.1789.

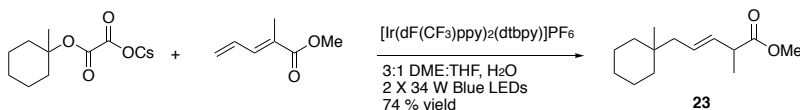

**Methyl (*E*)-2-methyl-5-(1-methylcyclohexyl)pent-3-enoate (23):** According to the general procedure, cesium oxalate **10** (35 mg, 0.1 mmol, 1.0 equiv) was used as the radical precursor and methyl (*E*)-2-methylpenta-2,4-dienoate (14 mg, 0.11 mmol, 1.1 equiv) was used the acceptor. The crude residue was purified by flash chromatography (50:1 hexanes/EtOAc) to yield methyl ester **23** (17 mg, 74% yield) as a pale yellow oil.

$R_f$  0.2 (40:1 hexanes/EtOAc); visualized with  $\text{KMnO}_4$ .  $^1\text{H}$  NMR (500 MHz,  $\text{CDCl}_3$ )  $\delta$  5.59 – 5.54 (m, 1H), 5.50 – 5.46 (m, 1H), 3.68 (s, 3H), 3.13 (p,  $J = 7.0$  Hz, 1H), 1.93 (d,  $J = 7.5$  Hz, 2H), 1.43 – 1.22 (m, 13H), 0.83 (s, 3H);  $^{13}\text{C}$  NMR (151 MHz,  $\text{CDCl}_3$ )  $\delta$  175.8, 131.2, 129.0, 52.0, 44.9, 43.1, 37.832, 37.826, 33.5, 26.6, 25.3, 22.2, 17.8; IR (thin film) 2925, 2860, 1755, 1452, 1375  $\text{cm}^{-1}$ ; HRMS (ESI/TOF)  $m/z$  calculated for  $\text{C}_{14}\text{H}_{24}\text{O}_2$   $[\text{M} + \text{Na}]^+$  247.1674, observed 247.1677.

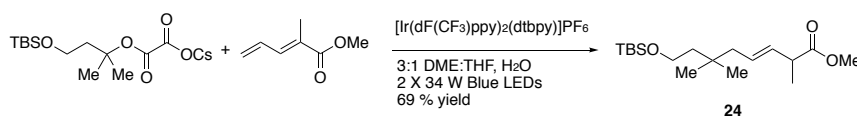

**Methyl (E)-8-((tert-butyldimethylsilyl)oxy)-2,6,6-trimethyloct-3-enoate (24):**

According to the general procedure, the cesium oxalate (42 mg, 0.1 mmol, 1.0 equiv) was used as the radical precursor and methyl (E)-2-methylpenta-2,4-dienoate (14 mg, 0.11 mmol, 1.1 equiv) was used the acceptor. The crude residue was purified by flash chromatography (95:5 hexanes/EtOAc) to yield methyl ester **24** (23 mg, 69% yield) as a pale yellow oil.  $R_f$  0.7 (85:15 hexanes/EtOAc); visualized with  $\text{KMnO}_4$ .  $^1\text{H}$  NMR (500 MHz,  $\text{CDCl}_3$ )  $\delta$  5.60 – 5.54 (m, 1H), 5.48 (dd,  $J = 15.3, 7.5$  Hz, 1H), 3.68 – 3.65 (m, 5H), 3.13 (p,  $J = 7.5$  Hz, 1H), 1.92 (d,  $J = 7.0$  Hz, 2H), 1.46 (t,  $J = 7.5$  Hz, 2H), 1.25 (d,  $J = 7.5$  Hz, 3H), 0.89 (s, 9H), 0.86 (s, 6H), 0.05 (s, 6H);  $^{13}\text{C}$  NMR (126 MHz,  $\text{CDCl}_3$ )  $\delta$  175.5, 131.5, 129.0, 60.2, 52.0, 45.6, 44.3, 43.1, 32.9, 27.4, 26.2, 18.5, 17.7, -5.1; IR (thin film) 2955, 2930, 2857, 1730, 1463  $\text{cm}^{-1}$ ; HRMS (ESI/TOF)  $m/z$  calculated for  $\text{C}_{18}\text{H}_{36}\text{O}_3\text{Si}$   $[\text{M} + \text{Na}]^+$  351.2332, observed 351.2342.

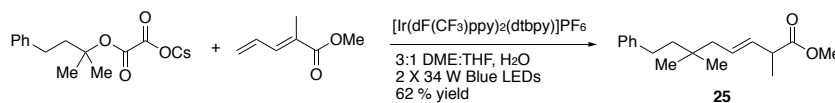

**Methyl (E)-2,6,6-trimethyl-8-phenyloct-3-enoate (25):** According to the general procedure, the cesium oxalate (110 mg, 0.3 mmol, 1.0 equiv) was used as the radical precursor and methyl (E)-2-methylpenta-2,4-dienoate (42 mg, 0.33 mmol, 1.1 equiv) was used the acceptor. The crude residue was purified by flash chromatography (95:5

hexanes/EtOAc) to yield methyl ester **25** (52 mg, 62% yield) as a pale yellow oil.  $R_f$  0.7 (85:15 hexanes/EtOAc); visualized with  $\text{KMnO}_4$ .  $^1\text{H}$  NMR (600 MHz,  $\text{CDCl}_3$ )  $\delta$  7.29 – 7.27 (m, 2H), 7.18 – 7.17 (m, 3H), 5.62 – 5.52 (m, 2H), 3.67 (s, 3H), 3.16 (quintet,  $J$  = 7.2 Hz, 1H), 2.57 – 2.54 (m, 2H), 2.00 (d,  $J$  = 6.9 Hz, 2H), 1.50 – 1.47 (m, 2H), 1.27 (d,  $J$  = 7.2 Hz, 3H), 0.93 (s, 6H);  $^{13}\text{C}$  NMR (151 MHz,  $\text{CDCl}_3$ )  $\delta$  175.5, 143.5, 131.4, 128.9, 128.4, 128.3, 125.6, 51.8, 44.7, 44.2, 43.0, 33.6, 30.7, 27.09, 27.06, 17.6; IR (thin film) 2953, 2933, 1738, 1454, 1161  $\text{cm}^{-1}$ ; HRMS (ESI/TOF)  $m/z$  calculated for  $\text{C}_{18}\text{H}_{26}\text{O}_2$   $[\text{M} + \text{Na}]^+$  297.1830, observed 297.1840.

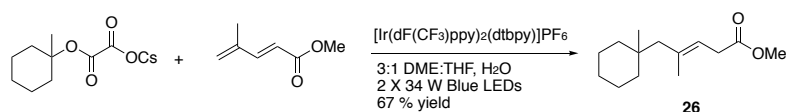

**Methyl (E)-4-methyl-5-(1-methylcyclohexyl)pent-3-enoate (26):** According to the general procedure, the cesium oxalate **10** (35 mg, 0.1 mmol, 1.0 equiv) was used as the radical precursor and methyl (*E*)-4-methylpenta-2,4-dienoate (14 mg, 0.11 mmol, 1.1 equiv) was used the acceptor. The crude residue was purified by flash chromatography (40:1 hexanes/EtOAc) to yield methyl ester **26** (15 mg, 67% yield) as a pale yellow oil.  $R_f$  0.2 (50:1 hexanes/EtOAc); visualized with  $\text{KMnO}_4$ .  $^1\text{H}$  NMR (500 MHz,  $\text{CDCl}_3$ )  $\delta$  5.29 (t,  $J$  = 7.0 Hz, 1H), 3.69 (s, 3H), 3.07 (d,  $J$  = 7.0 Hz, 2H), 1.99 (s, 2H), 1.69 (s, 3H), 1.50 – 1.41 (m, 5H), 1.29 – 1.26 (m, 5H), 0.87 (s, 3H);  $^{13}\text{C}$  NMR (151 MHz,  $\text{CDCl}_3$ )  $\delta$  173.1, 137.2, 119.6, 52.3, 51.9, 38.5, 34.4, 34.0, 26.7, 25.3, 22.4, 19.7; IR (thin film) 2925, 2849, 1758, 1435, 1260  $\text{cm}^{-1}$ ; HRMS (ESI/TOF)  $m/z$  calculated for  $\text{C}_{14}\text{H}_{24}\text{O}_2$   $[\text{M} + \text{NH}_4]^+$  242.2120, observed 242.2110.

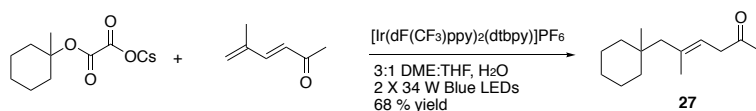

**(E)-5-methyl-6-(1-methylcyclohexyl)hex-4-en-2-one (27):** According to the general procedure, cesium oxalate **10** (35 mg, 0.1 mmol, 1.0 equiv) was used as the radical precursor and (*E*)-5-methylhexa-3,5-dien-2-one (12 mg, 0.11 mmol, 1.1 equiv) was used

the acceptor. The crude residue was purified by flash chromatography (50:1 hexanes/EtOAc) to yield ketone **27** (14 mg, 68% yield) as a pale yellow oil.  $R_f$  0.2 (50:1 hexanes/EtOAc); visualized with  $\text{KMnO}_4$ .  $^1\text{H}$  NMR (600 MHz,  $\text{CDCl}_3$ )  $\delta$  5.29 (tt,  $J = 7.2$ , 0.6 Hz, 1H), 3.13 (d,  $J = 7.2$  Hz, 2H), 2.15 (s, 3H), 2.00 (s, 2H), 1.69 (d,  $J = 0.6$  Hz, 3H), 1.49 – 1.41 (m, 5H), 1.30 – 1.25 (m, 5H), 0.87 (s, 3H);  $^{13}\text{C}$  NMR (151 MHz,  $\text{CDCl}_3$ )  $\delta$  207.6, 137.6, 119.7, 52.4, 44.0, 38.5, 34.4, 29.6, 26.7, 25.4, 22.4, 19.8; IR (thin film) 2928, 2860, 1716, 1450, 1355  $\text{cm}^{-1}$ ; HRMS (ESI/TOF)  $m/z$  calculated for  $\text{C}_{14}\text{H}_{24}\text{O}$   $[\text{M} + \text{NH}_4]^+$  226.171, observed 226.2164.

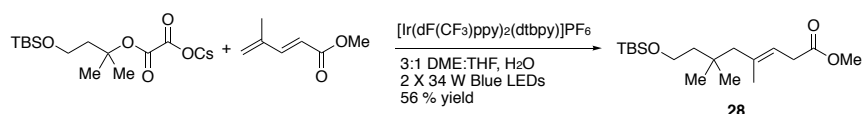

**Methyl (E)-8-((tert-butyldimethylsilyl)oxy)-4,6,6-trimethyloct-3-enoate (28):**

According to the general procedure, the cesium oxalate (42 mg, 0.1 mmol, 1.0 equiv) was used as the radical precursor and methyl (E)-4-methylpenta-2,4-dienoate (14 mg, 0.11 mmol, 1.1 equiv) was used the acceptor. The crude residue was purified by flash chromatography (95:5 hexanes/EtOAc) to yield methyl ester **28** (18 mg, 56% yield) as a pale yellow oil.<sup>10</sup>  $R_f$  0.7 (85:15 hexanes/EtOAc); visualized with  $\text{KMnO}_4$ .  $^1\text{H}$  NMR (500 MHz,  $\text{CDCl}_3$ )  $\delta$  5.30 (t,  $J = 7.0$  Hz, 1H), 3.70 – 3.68 (m, 5H), 3.07 (d,  $J = 7.0$  Hz, 1H), 1.98 (s, 2H), 1.69 (s, 3H), 1.49 (t,  $J = 7.5$  Hz, 2H), 0.90 (s, 6H), 0.89 (s, 9H), 0.05 (s, 6H);  $^{13}\text{C}$  NMR (126 MHz,  $\text{CDCl}_3$ )  $\delta$  173.0, 137.0, 120.0, 60.3, 52.4, 51.9, 45.3, 34.0, 33.8, 27.8, 26.2, 19.5, 18.5, -5.0; IR (thin film) 2954, 2857, 1744, 1471, 1255  $\text{cm}^{-1}$ ; HRMS (ESI/TOF)  $m/z$  calculated for  $\text{C}_{18}\text{H}_{36}\text{O}_3\text{Si}$   $[\text{M} + \text{Na}]^+$  351.2332, observed 351.2332.

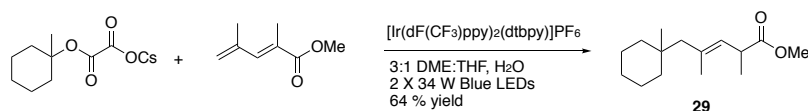



**Methyl (*E*)-2,4-dimethyl-5-(1-methylcyclohexyl)pent-3-enoate (**29**):** According to the general procedure, cesium oxalate **10** (35 mg, 0.1 mmol, 1.1 equiv) was used as the radical precursor and methyl (*E*)-2,4-dimethylpenta-2,4-dienoate (15 mg, 0.11 mmol, 1.1 equiv) was used the acceptor. The crude residue was purified by flash chromatography (95:5 hexanes/EtOAc) to yield methyl ester **29** (15 mg, 64% yield) as a pale yellow oil.  $R_f$  0.7 (85:15 hexanes/EtOAc); visualized with  $\text{KMnO}_4$ .  $^1\text{H}$  NMR (600 MHz,  $\text{CDCl}_3$ )  $\delta$  5.13 (d,  $J = 8.0$  Hz, 1H), 3.67 (s, 3H), 3.37 – 3.32 (m, 1H), 1.95 (s, 2H), 1.71 (d,  $J = 1.4$  Hz, 3H), 1.49 – 1.40 (m, 5H), 1.26 – 1.21 (m, 8H), 0.85 (s, 3H);  $^{13}\text{C}$  NMR (126 MHz,  $\text{CDCl}_3$ )  $\delta$  176.2, 135.5, 127.8, 52.2, 51.9, 39.2, 38.53, 38.48, 34.4, 26.7, 25.3, 22.4, 19.7, 18.1; IR (thin film) 2925, 2860, 1740, 1452, 1376  $\text{cm}^{-1}$ ; HRMS (ESI/TOF)  $m/z$  calculated for  $\text{C}_{15}\text{H}_{26}\text{O}_2$   $[\text{M} + \text{NH}_4]^+$  256.2277, observed 256.2270.

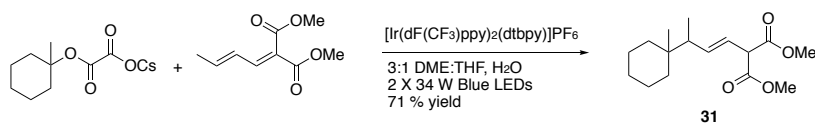

**Dimethyl (*E*)-2-(3-(1-methylcyclohexyl)but-1-en-1-yl)malonate (**31**):** According to the general procedure, cesium oxalate **10** (35 mg, 0.1 mmol, 1.1 equiv) was used as the radical precursor and dimethyl (*E*)-2-(but-2-en-1-ylidene)malonate (20 mg, 0.11 mmol, 1.1 equiv) was used the acceptor. The crude residue was purified by flash chromatography (25:1 hexanes/EtOAc) to yield malonate **31** (20 mg, 71% yield) as a pale yellow oil.  $R_f$  0.4 (20:1 hexanes/EtOAc); visualized with  $\text{KMnO}_4$ .  $^1\text{H}$  NMR (600 MHz,  $\text{CDCl}_3$ )  $\delta$  5.67 – 5.60 (m, 2H), 4.03 (d,  $J = 7.8$  Hz, 1H), 3.75 (s, 3H), 3.74 (s, 3H), 2.13 (p,  $J = 7.2$  Hz, 1H), 1.51 – 1.37 (m, 5H), 1.29 – 1.22 (m, 5H), 0.92 (d,  $J = 7.2$  Hz, 3H), 0.78 (s, 3H);  $^{13}\text{C}$  NMR (151 MHz,  $\text{CDCl}_3$ )  $\delta$  169.15, 169.13, 140.2, 121.0, 55.6, 52.9, 52.8, 45.6, 36.5, 36.1, 35.4, 26.6, 22.1, 22.0, 20.2, 14.2; IR (thin film) 2925, 2860, 1740, 1452, 1376  $\text{cm}^{-1}$ ; HRMS (ESI/TOF)  $m/z$  calculated for  $\text{C}_{16}\text{H}_{26}\text{O}_4$   $[\text{M} + \text{Na}]^+$  305.1729, observed 305.1719.

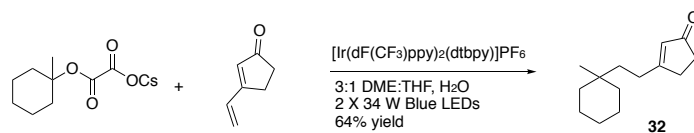

**3-(2-(1-Methylcyclohexyl)ethyl)cyclopent-2-en-1-one (32):** According to the general procedure, cesium oxalate **10** (35 mg, 0.1 mmol, 1.0 equiv) was used as the radical precursor and 3-vinylcyclopent-2-en-1-one (12 mg, 0.11 mmol, 1.1 equiv) was used the acceptor. The crude residue was purified by flash chromatography (5:1 hexanes/EtOAc) to yield ketone **32** (13 mg, 64% yield) as a pale yellow oil.  $R_f$  0.2 (5:1 hexanes/EtOAc); visualized with  $\text{KMnO}_4$ .  $^1\text{H}$  NMR (600 MHz,  $\text{CDCl}_3$ )  $\delta$  5.94 (p,  $J = 1.8$  Hz, 1H), 2.60 – 2.58 (m, 2H), 2.41 – 2.39 (m, 2H), 2.36 – 2.33 (m, 2H), 1.49 – 1.43 (m, 7H), 1.33 – 1.26 (m, 5H), 0.90 (s, 3H);  $^{13}\text{C}$  NMR (151 MHz,  $\text{CDCl}_3$ )  $\delta$  210.3, 184.4, 129.3, 39.5, 37.8, 35.5, 32.7, 31.9, 27.9, 26.6, 24.8, 22.2; IR (thin film) 2923, 2854, 1733, 1615, 1438  $\text{cm}^{-1}$ ; HRMS (ESI/TOF)  $m/z$  calculated for  $\text{C}_{12}\text{H}_{22}\text{O}$   $[\text{M} + \text{Na}]^+$  229.1568, observed 229.1578.

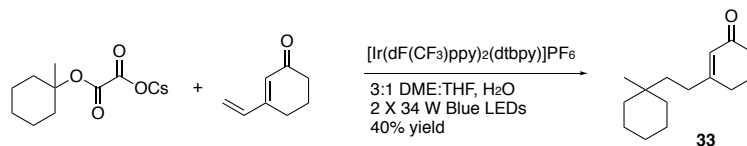

**3-(2-(1-Methylcyclohexyl)ethyl)cyclohex-2-en-1-one (33):** According to the general procedure, cesium oxalate **10** (35 mg, 0.1 mmol, 1.0 equiv) was used as the radical precursor and 3-vinylcyclohex-2-en-1-one (14 mg, 0.11 mmol, 1.1 equiv) was used the acceptor. The crude residue was purified by flash chromatography (5:1 hexanes/EtOAc) to yield ketone **33** (9 mg, 40% yield) as a pale yellow oil.  $R_f$  0.2 (5:1 hexanes/EtOAc); visualized with  $\text{KMnO}_4$ .  $^1\text{H}$  NMR (600 MHz,  $\text{CDCl}_3$ )  $\delta$  5.89 (t,  $J = 1.2$  Hz, 1H), 2.37 – 2.35 (m, 2H), 2.31 (t,  $J = 5.6$  Hz, 2H), 2.15 – 2.12 (m, 2H), 1.99 (p,  $J = 6.6$  Hz, 2H), 1.45 – 1.37 (m, 7H), 1.34 – 1.26 (m, 5H), 0.88 (s, 3H);  $^{13}\text{C}$  NMR (151 MHz,  $\text{CDCl}_3$ )  $\delta$  200.2, 168.1, 125.6, 39.5, 37.9, 37.5, 32.8, 32.5, 30.2, 26.6, 25.0, 23.0, 22.2; IR (thin film) 2924, 2859, 1690, 1624, 1453  $\text{cm}^{-1}$ ; HRMS (ESI/TOF)  $m/z$  calculated for  $\text{C}_{15}\text{H}_{24}\text{O}$   $[\text{M} + \text{Na}]^+$  243.1725, observed 243.1725.

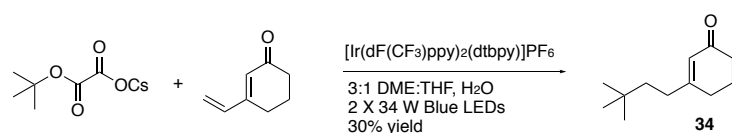

**3-(3,3-dimethylbutyl)cyclohex-2-en-1-one (34):** According to the general procedure, the cesium oxalate (28 mg, 0.1 mmol, 1.0 equiv) was used as the radical precursor and 3-vinylcyclohex-2-en-1-one (14 mg, 0.11 mmol, 1.1 equiv) was used the acceptor. The crude residue was purified by flash chromatography (5:1 hexanes/EtOAc) to yield ketone **34** (6 mg, 30% yield) as a pale yellow oil.  $R_f$  0.2 (5:1 hexanes/EtOAc); visualized with  $\text{KMnO}_4$ .  $^1\text{H}$  NMR (600 MHz,  $\text{CDCl}_3$ )  $\delta$  5.88 (t,  $J = 1.2$  Hz, 1H), 2.36 – 2.34 (m, 2H), 2.30 (t,  $J = 6.0$  Hz, 2H), 2.18 – 2.15 (m, 2H), 1.99 (p,  $J = 6.0$  Hz, 2H), 1.38 – 1.35 (m, 2H), 0.92 (s, 3H);  $^{13}\text{C}$  NMR (151 MHz,  $\text{CDCl}_3$ )  $\delta$  200.1, 167.8, 125.6, 41.5, 37.5, 33.7, 30.5, 30.1, 29.4, 23.0; IR (thin film) 2953, 2867, 2080, 1673, 1625  $\text{cm}^{-1}$ ; HRMS (ESI/TOF)  $m/z$  calculated for  $\text{C}_{12}\text{H}_{20}\text{O}$   $[\text{M} + \text{Na}]^+$  203.1412, observed 203.1413.

## General procedure for the coupling of carboxylic acids with 1,3-dienes:

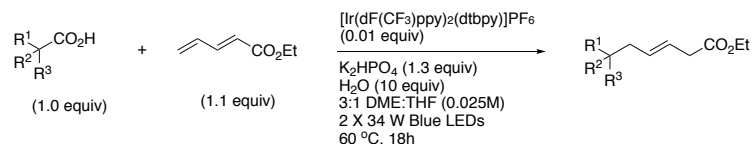

A 8 mL-scintillation vial equipped with a Teflon septum and magnetic stir bar was charged with the carboxylic acid (0.1 mmol, 1.0 equiv) and [Ir(dF(CF<sub>3</sub>)ppy)<sub>2</sub>(dtbbpy)]PF<sub>6</sub> (1.1 mg, 0.001 mmol, 0.01 equiv). A 3:1 mixture of DME/THF (4 mL, 0.025 M) was added, followed by water (18  $\mu$ L, 1.0 mmol, 10 equiv), K<sub>2</sub>HPO<sub>4</sub> (23 mg, 0.13 equiv, 1.3 equiv) and the pentadienoate **11** (14 mg, 0.11 mmol, 1.1 equiv). The reaction mixture was degassed by sparging with argon for 10 min and the vial was sealed and irradiated (2 x 34 W blue LED lamps) for 18 h with the reaction temperature rising to 60 °C because of heat given off from the LEDs. The reaction mixture was diluted with water (10 mL) and the aqueous phase was extracted with Et<sub>2</sub>O (3 x 10 mL). The combined ethereal extracts were washed with brine (10 mL), dried over Na<sub>2</sub>SO<sub>4</sub> and concentrated. The crude material was purified by flash column chromatography on silica gel to yield corresponding addition products. Results of these experiments are summarized in Scheme 4 of the publication.

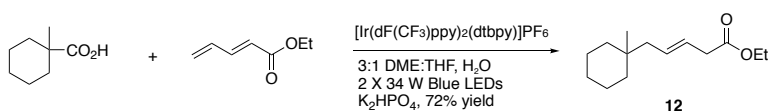

**Ethyl (E)-5-(1-methylcyclohexyl)pent-3-enoate (12):** According to the general procedure, carboxylic acid (14 mg, 0.1 mmol, 1.0 equiv) was used as the radical precursor and pentadienoate **11** (14 mg, 0.11 mmol, 1.1 equiv) was used the acceptor. The crude residue was purified by flash chromatography (5:1 hexanes/EtOAc) to yield ethyl ester **12** (16 mg, 72% yield) as a pale yellow oil. R<sub>f</sub> 0.2 (50:1 hexanes/EtOAc); visualized with KMnO<sub>4</sub>. Spectral data match those above reported.

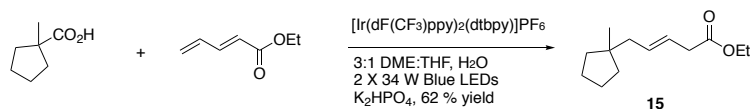

**Ethyl (*E*)-5-(1-methylcyclopentyl)pent-3-enoate (**15**):** According to the general procedure, carboxylic acid (13 mg, 0.1 mmol, 1.0 equiv) was used as the radical precursor and pentadienoate **11** (14 mg, 0.11 mmol, 1.1 equiv) was used the acceptor. The crude residue was purified by flash chromatography (5:1 hexanes/EtOAc) to yield ethyl ester **15** (13 mg, 62% yield) as a pale yellow oil.  $R_f$  0.2 (50:1 hexanes/EtOAc); visualized with  $\text{KMnO}_4$ . Spectral data match those above reported.

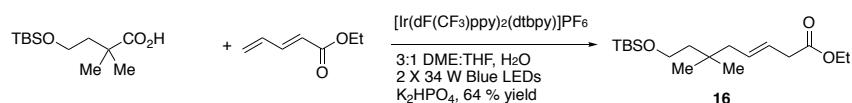

**Ethyl (*E*)-8-((*tert*-butyldimethylsilyl)oxy)-6,6-dimethyloct-3-enoate (**16**):** According to the general procedure, carboxylic acid (25 mg, 0.1 mmol, 1.0 equiv) was used as the radical precursor and pentadienoate **11** (14 mg, 0.11 mmol, 1.1 equiv) was used the acceptor. The crude residue was purified by flash chromatography (5:1 hexanes/EtOAc) to yield ethyl ester **16** (21 mg, 64% yield) as a pale yellow oil.  $R_f$  0.2 (50:1 hexanes/EtOAc); visualized with  $\text{KMnO}_4$ . Spectral data match those above reported.

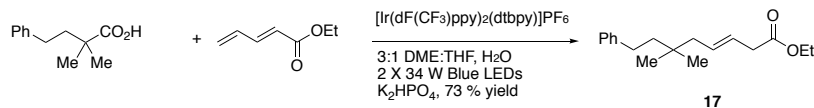

**Ethyl (*E*)-6,6-dimethyl-8-phenyloct-3-enoate (**17**):** According to the general procedure, carboxylic acid (19 mg, 0.1 mmol, 1.0 equiv) was used as the radical precursor and pentadienoate **11** (14 mg, 0.11 mmol, 1.1 equiv) was used the acceptor. The crude residue was purified by flash chromatography (5:1 hexanes/EtOAc) to yield ethyl ester **17** (20 mg, 73% yield) as a pale yellow oil.  $R_f$  0.2 (50:1 hexanes/EtOAc); visualized with  $\text{KMnO}_4$ . Spectral data match those above reported.

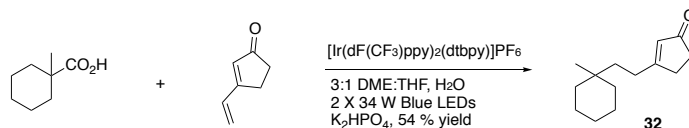

**3-(2-(1-Methylcyclohexyl)ethyl)cyclopent-2-en-1-one (32):** According to the general procedure, carboxylic acid (14 mg, 0.1 mmol, 1.0 equiv) was used as the radical precursor and 3-vinylcyclopent-2-en-1-one (12 mg, 0.11 mmol, 1.1 equiv) was used the acceptor. The crude residue was purified by flash chromatography (5:1 hexanes/EtOAc) to yield ketone **32** (11 mg, 54% yield) as a pale yellow oil.  $R_f$  0.2 (50:1 hexanes/EtOAc); visualized with  $\text{KMnO}_4$ . Spectral data match those above reported.

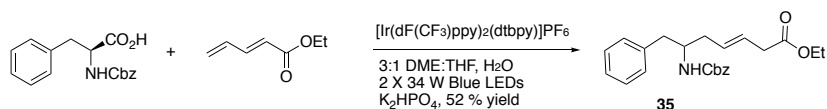

**Ethyl (*E*)-6-(((benzyloxy)carbonyl)amino)-7-phenylhept-3-enoate (35):** According to the general procedure, carboxylic acid (30 mg, 0.1 mmol, 1.0 equiv) was used as the radical precursor and pentadienoate **11** (14 mg, 0.11 mmol, 1.1 equiv) was used the acceptor. The crude residue was purified by flash chromatography (5:1 hexanes/EtOAc) to yield ethyl ester **35** (20 mg, 52% yield) as a pale yellow oil.  $R_f$  0.2 (5:1 hexanes/EtOAc); visualized with  $\text{KMnO}_4$ .  $^1\text{H}$  NMR (600 MHz,  $\text{CDCl}_3$ )  $\delta$  7.38 – 7.18 (m, 10H), 5.65 – 5.60 (m, 1H), 5.58 – 5.53 (m, 1H), 5.11 – 5.06 (m, 2H), 4.67 (d,  $J$  = 7.2 Hz, 1H), 4.15 (q,  $J$  = 7.2 Hz, 2H), 3.99 (d,  $J$  = 6.0 Hz, 1H), 3.05 (d,  $J$  = 6.6 Hz, 2H), 2.84 – 2.77 (m, 2H), 2.31 – 2.27 (m, 1H), 2.18 – 2.13 (m, 1H), 1.26 (t,  $J$  = 7.2 Hz, 3H);  $^{13}\text{C}$  NMR (151 MHz,  $\text{CDCl}_3$ )  $\delta$  171.8, 155.8, 137.8, 136.7, 129.8, 129.5, 128.54, 128.49, 128.11, 128.07, 126.5, 125.7, 66.6, 60.7, 51.8, 40.4, 38.1, 36.7, 14.2; IR (thin film) 3342, 2928, 1731, 1528, 1251  $\text{cm}^{-1}$ ; HRMS (ESI/TOF)  $m/z$  calculated for  $\text{C}_{23}\text{H}_{27}\text{NO}_4$   $[\text{M} + \text{Na}]^+$  404.1838, observed 404.1829.

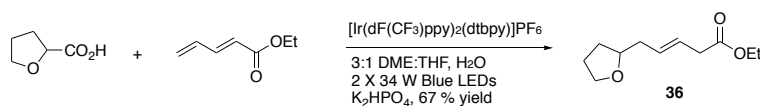

**Ethyl (*E*)-5-(tetrahydrofuran-2-yl)pent-3-enoate (**36**):** According to the general procedure, carboxylic acid (12 mg, 0.1 mmol, 1.0 equiv) was used as the radical precursor and pentadienoate **11** (14 mg, 0.11 mmol, 1.1 equiv) was used the acceptor. The crude residue was purified by flash chromatography (10:1 hexanes/EtOAc) to yield ethyl ester **36** (13 mg, 67% yield) as a pale yellow oil. *R<sub>f</sub>* 0.2 (10:1 hexanes/EtOAc); visualized with KMnO<sub>4</sub>. <sup>1</sup>H NMR (500 MHz, CDCl<sub>3</sub>) δ 5.67 – 5.56 (m, 2H), 4.14 (q, *J* = 7.0 Hz, 2H), 3.87 (p, *J* = 6.5 Hz, 2H), 3.73 (q, *J* = 7.0 Hz, 1H), 3.05 (d, *J* = 6.0 Hz, 2H), 2.36 – 2.30 (m, 1H), 2.27 – 2.22 (m, 1H), 1.98 – 1.84 (m, 3H), 1.54 – 1.47 (m, 1H), 1.26 (t, *J* = 7.0 Hz, 3H); <sup>13</sup>C NMR (126 MHz, CDCl<sub>3</sub>) δ 172.3, 131.0, 124.3, 78.9, 68.1, 60.8, 38.9, 38.4, 31.0, 25.9, 14.4; IR (thin film) 3541, 2977, 1738, 1645, 1177 cm<sup>-1</sup>; HRMS (ESI/TOF) *m/z* calculated for C<sub>11</sub>H<sub>18</sub>O<sub>3</sub> [M + Na]<sup>+</sup> 221.1154, observed 221.1151.

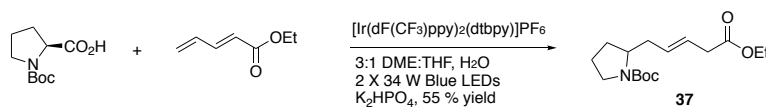

***tert*-Butyl (*E*)-2-(5-ethoxy-5-oxopent-2-en-1-yl)pyrrolidine-1-carboxylate (**37**):** According to the general procedure, carboxylic acid (22 mg, 0.1 mmol, 1.0 equiv) was used as the radical precursor and pentadienoate **11** (14 mg, 0.11 mmol, 1.1 equiv) was used the acceptor. The crude residue was purified by flash chromatography (5:1 hexanes/EtOAc) to yield ethyl ester **37** (16 mg, 55% yield) as a pale yellow oil.<sup>10</sup> *R<sub>f</sub>* 0.2 (5:1 hexanes/EtOAc); visualized with KMnO<sub>4</sub>. <sup>1</sup>H NMR (500 MHz, C<sub>6</sub>D<sub>6</sub>) at 70 °C δ 5.61 – 5.56 (m, 1H), 5.44 – 5.38 (m, 1H), 3.95 (q, *J* = 7.0 Hz, 2H), 3.80 (br, 1H), 3.31 (br, 1H), 3.20 – 3.19 (m, 1H), 2.85 (d, *J* = 7.0 Hz, 2H), 2.46 (br, 1H), 2.12 – 2.09 (m,

1H), 1.54 – 1.33 (m, 15H), 0.98 (t,  $J = 7.0$  Hz, 3H);  $^{13}\text{C}$  NMR (151 MHz,  $\text{C}_6\text{D}_6$ ) at 70 °C  $\delta$  170.5, 153.8, 130.5, 124.5, 78.1, 59.7, 56.8, 46.4, 37.9, 37.2, 29.6, 28.3, 23.0, 13.8; IR (thin film) 2979, 2877, 1738, 1696, 1393  $\text{cm}^{-1}$ ; HRMS (ESI/TOF)  $m/z$  calculated for  $\text{C}_{16}\text{H}_{27}\text{NO}_4$   $[\text{M} + \text{Na}]^+$  320.1838, observed 320.1836.



## **Spectral Data**

<sup>1</sup>H spectrum

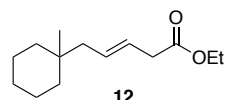

<sup>1</sup>H NMR (CDCl<sub>3</sub>, 600 MHz)

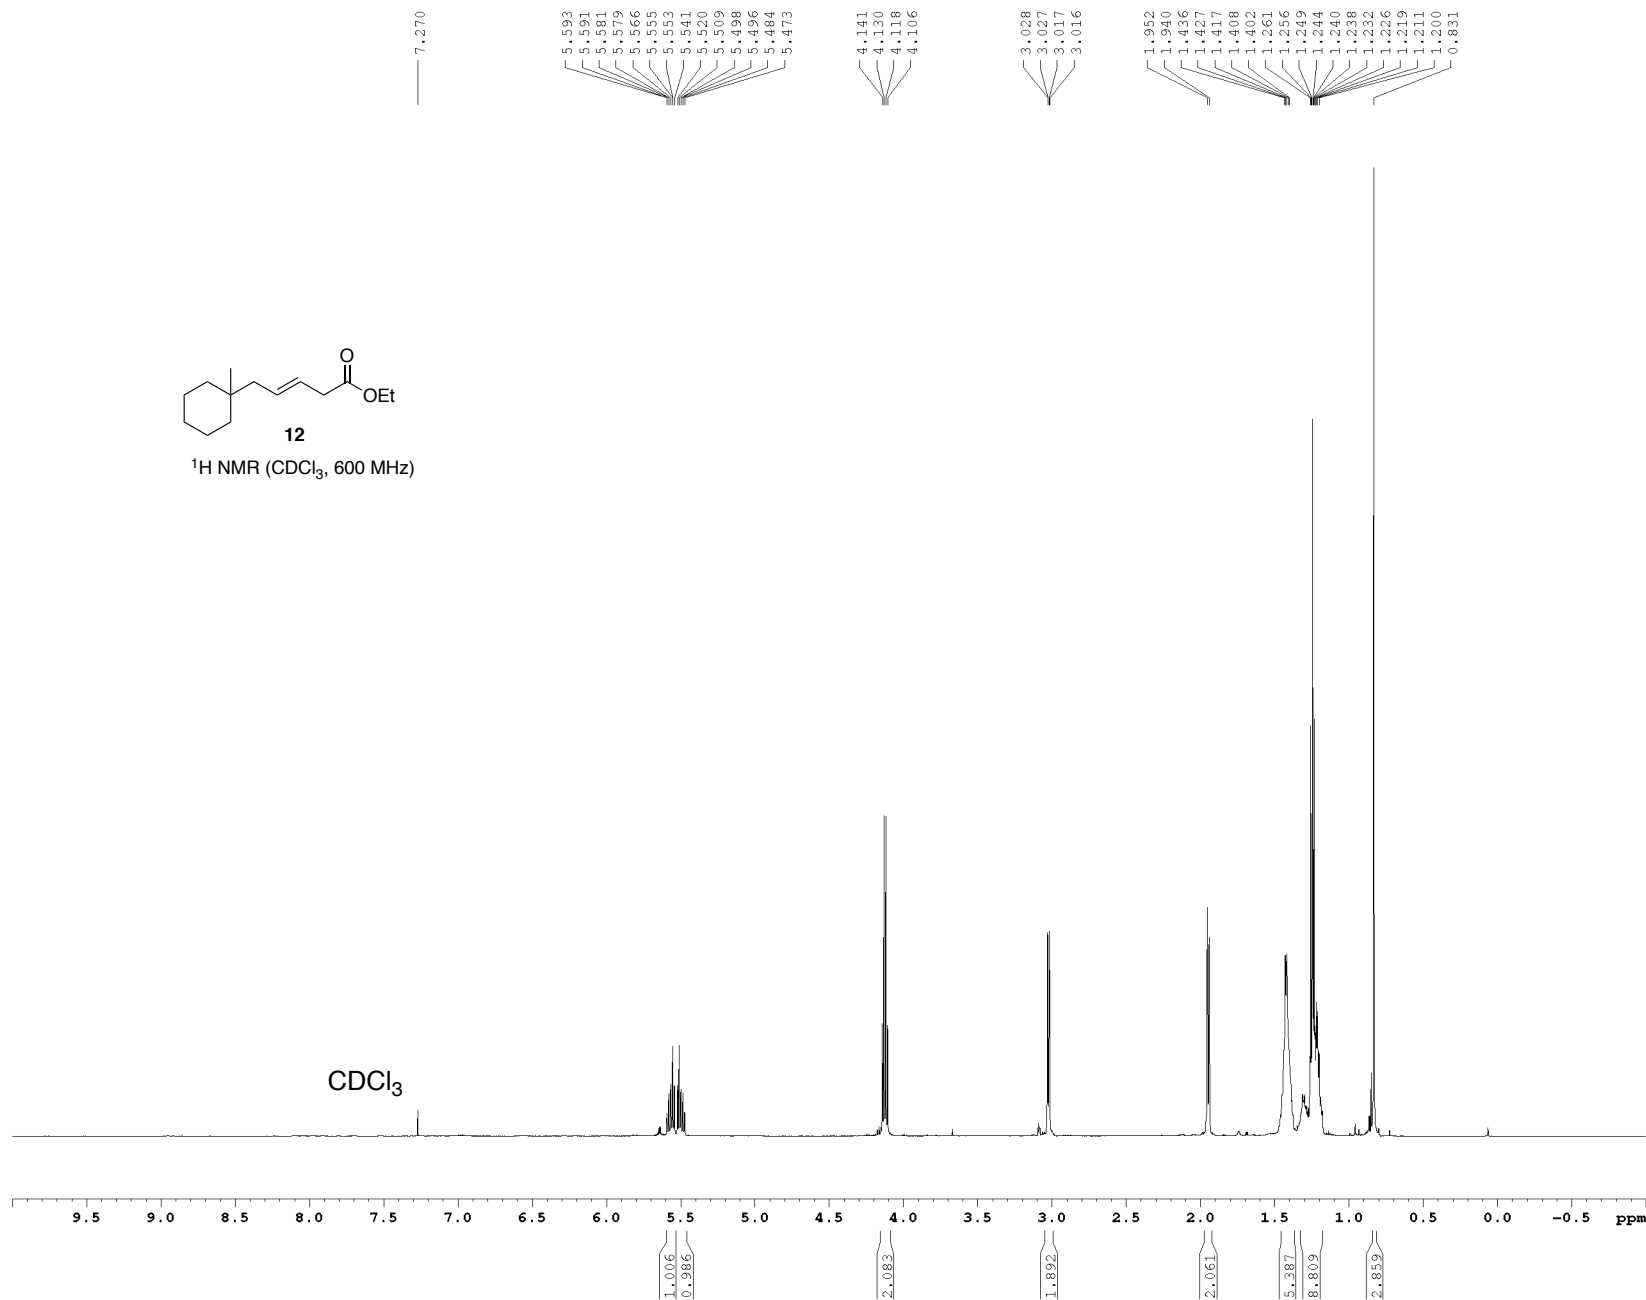

Current Data Parameters  
NAME PZ-2151-E  
EXPNO 1  
PROCNO 1  
DATPATH /v/data/zhaop3/nmr  
F2 - Acquisition Parameters  
Date\_ 20170421  
Time 13.44  
INSTRUM av600  
PROBHD 5 mm CPBBO BB-  
PULPROG zg30  
TD 98074  
SOLVENT CDCl3  
NS 8  
DS 2  
SWH 9615.385 Hz  
FIDRES 0.098042 Hz  
AQ 5.0998478 sec  
RG 22.6  
DW 52.000 usec  
DE 13.70 usec  
TE 298.0 K  
D1 0.10000000 sec  
TD0 1  
===== CHANNEL f1 =====  
SFO1 600.1342009 MHz  
NUC1 1H  
P1 12.00 usec  
PLW1 20.00000000 W  
F2 - Processing parameters  
SI 65536  
SF 600.1300279 MHz  
WDW EM  
SSB 0  
LB 0.30 Hz  
GB 0  
PC 1.00

**<sup>13</sup>C spectrum with <sup>1</sup>H decoupling**

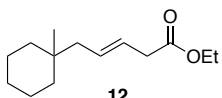

<sup>13</sup>C NMR (CDCl<sub>3</sub>, 151 MHz)

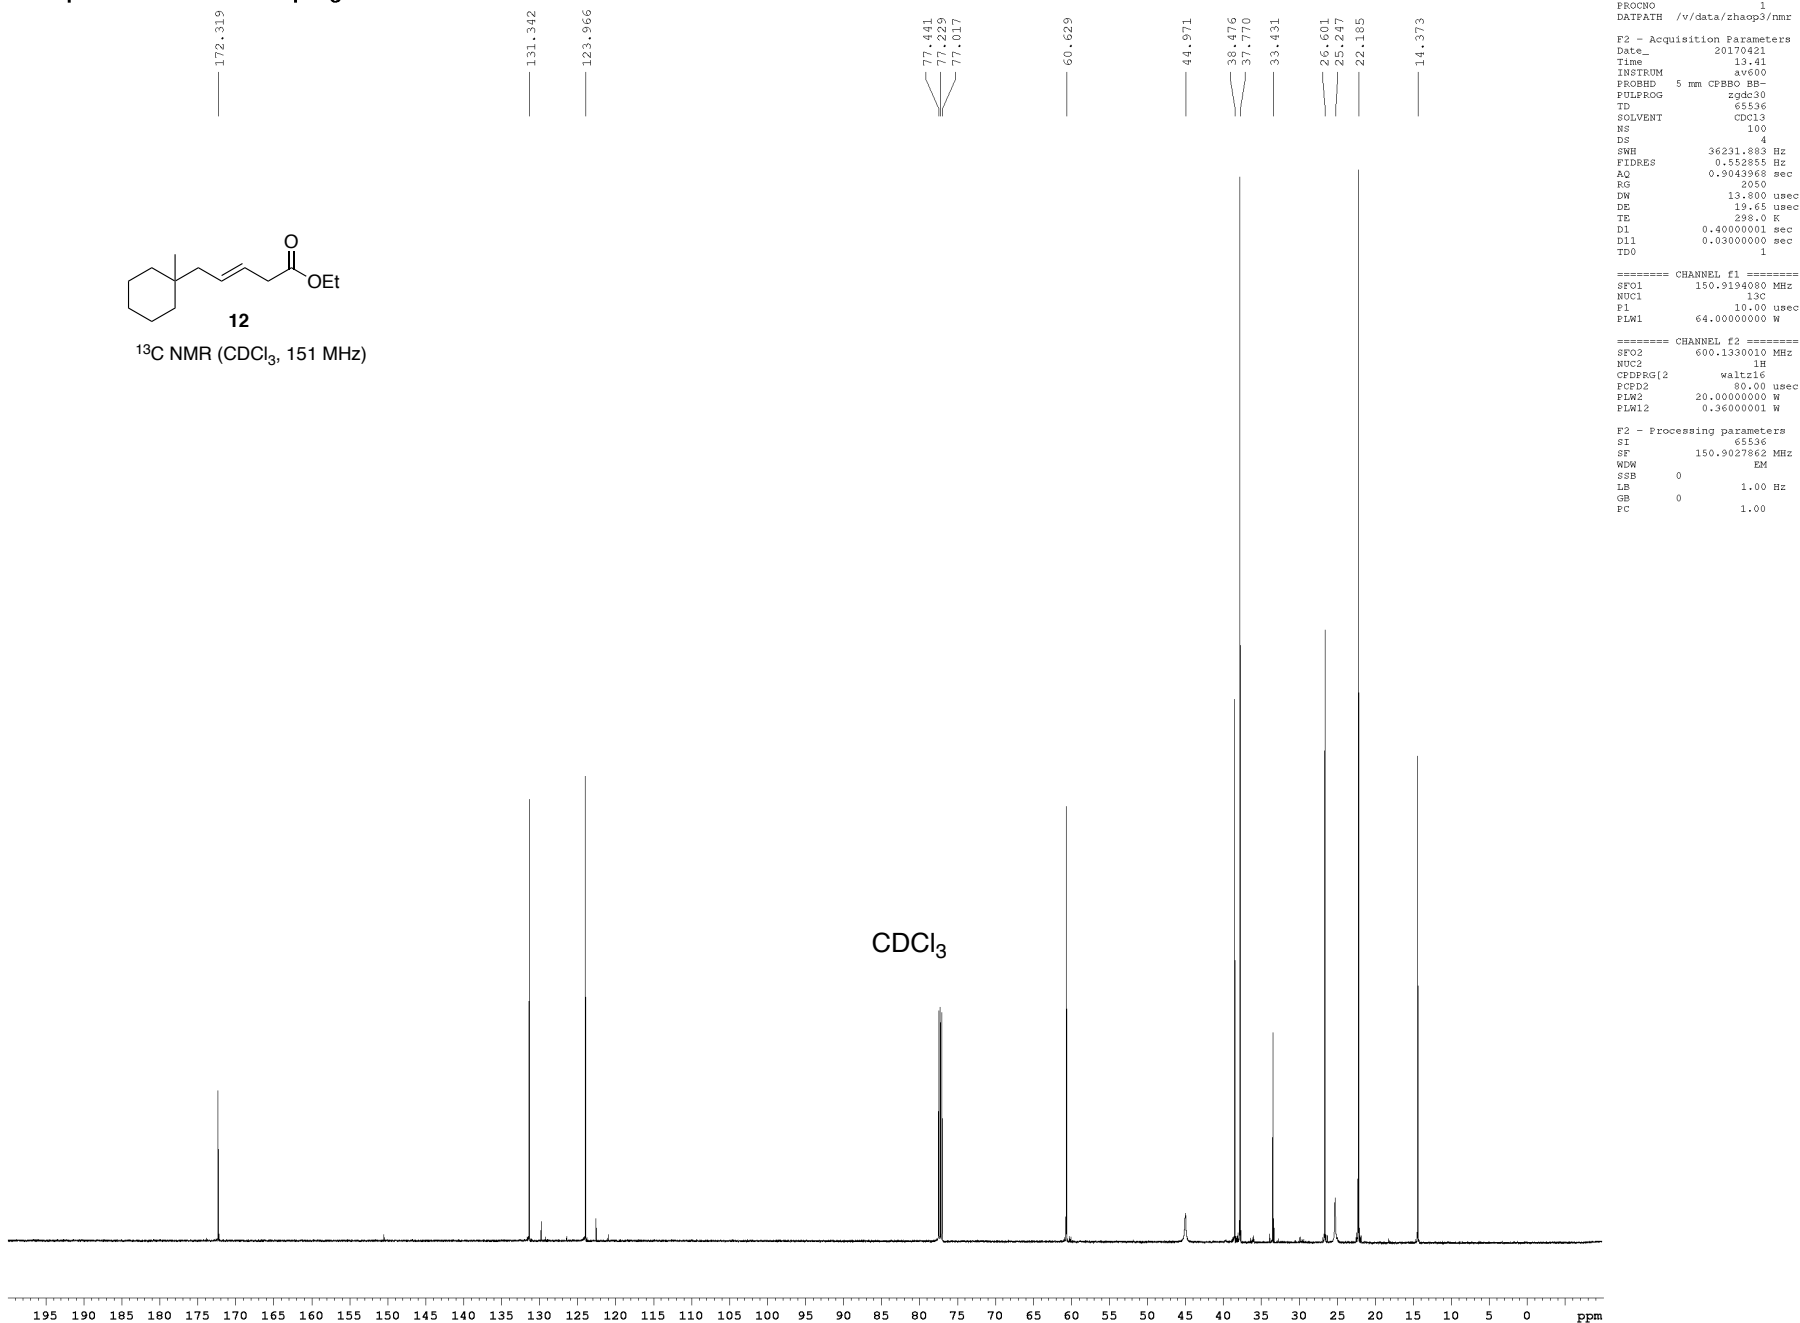

```

Current Data Parameters
NAME      P2-2151-E
EXPNO     2
PROCNO    1
DATPATH   /v/data/zhaop3/nmr

F2 - Acquisition Parameters
Date_     20170421
Time      13.41
INSTRUM    av600
PROBHD     5 mm CPBBO BB-
PULPROG    zgpg30
TD         65536
SOLVENT    CDCl3
NS          100
DS          4
SWH         36231.883 Hz
FIDRES      0.552855 Hz
AQ          0.9043968 sec
RG          2050
DW          13.800 usec
DE          19.65 usec
TE          298.0 K
D1          0.40000001 sec
D11         0.03000000 sec
TD0         1

===== CHANNEL f1 =====
SFO1       150.9194080 MHz
NUC1       13C
P1         10.00 usec
PLW1       64.00000000 W

===== CHANNEL f2 =====
SFO2       600.1330010 MHz
NUC2       1H
CDPPRG2    waltz16
PCPD2      80.00 usec
PLW2       20.00000000 W
PLW12      0.36000001 W

F2 - Processing parameters
SI         65536
SF         150.9027862 MHz
WDW        EM
SSB        0
LB         1.00 Hz
GB         0
PC         1.00
    
```

<sup>1</sup>H spectrum

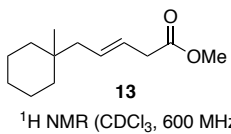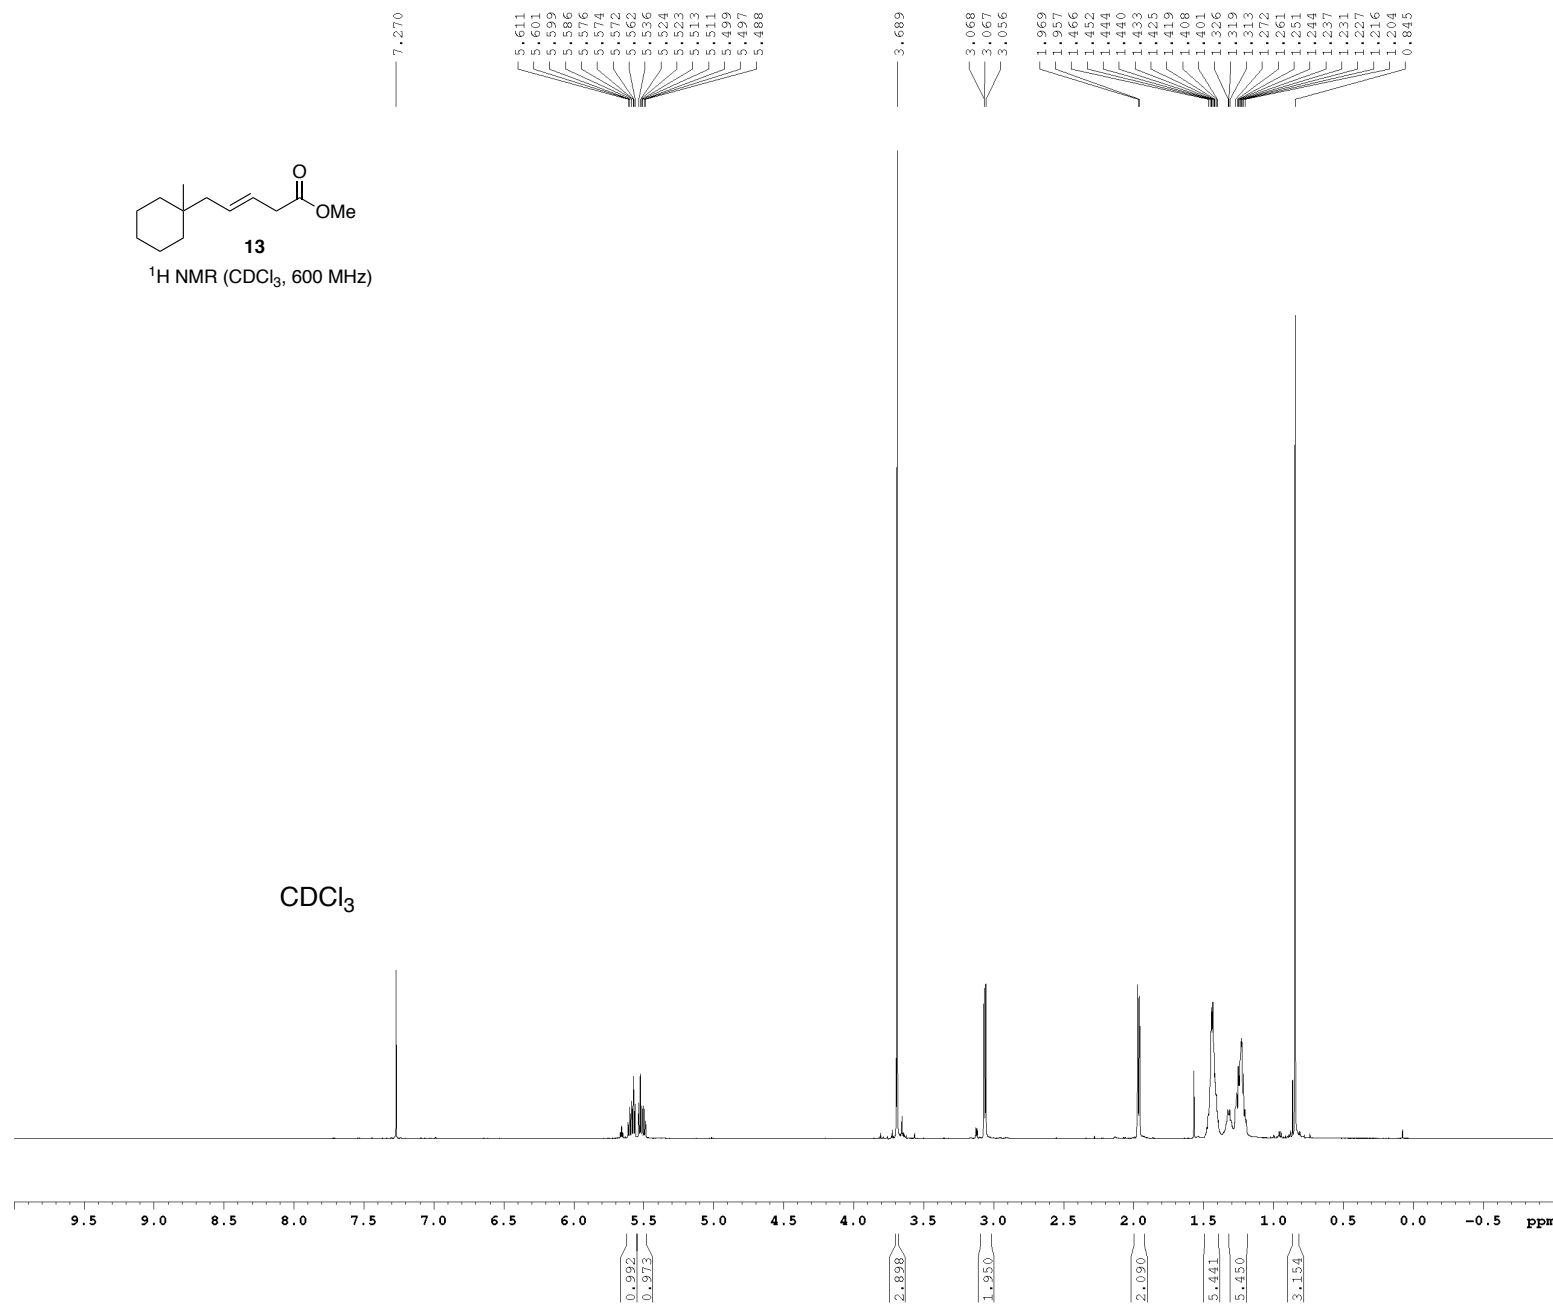

Current Data Parameters  
 NAME P2-2151-C  
 EXPNO 1  
 PROCNO 1  
 DATPATH /v/data/zhaop3/nmr

F2 - Acquisition Parameters  
 Date\_ 20170421  
 Time 11.54  
 INSTRUM av600  
 PROBHD 5 mm CPBBO BB-  
 PULPROG zg30  
 TD 98074  
 SOLVENT CDCl3  
 NS 8  
 DS 2  
 SWH 9615.385 Hz  
 FIDRES 0.098042 Hz  
 AQ 5.0998478 sec  
 RG 22.6  
 DW 52.000 usec  
 DE 13.70 usec  
 TE 298.0 K  
 D1 0.10000000 sec  
 TD0 1

===== CHANNEL f1 =====  
 SF01 600.1342009 MHz  
 NUC1 1H  
 P1 12.00 usec  
 PLW1 20.00000000 W

F2 - Processing parameters  
 SI 65536  
 SF 600.1300281 MHz  
 WDW EM  
 SSB 0  
 LB 0.30 Hz  
 GB 0  
 PC 1.00

**<sup>13</sup>C spectrum with <sup>1</sup>H decoupling**

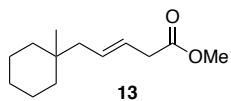

<sup>13</sup>C NMR (CDCl<sub>3</sub>, 151 MHz)

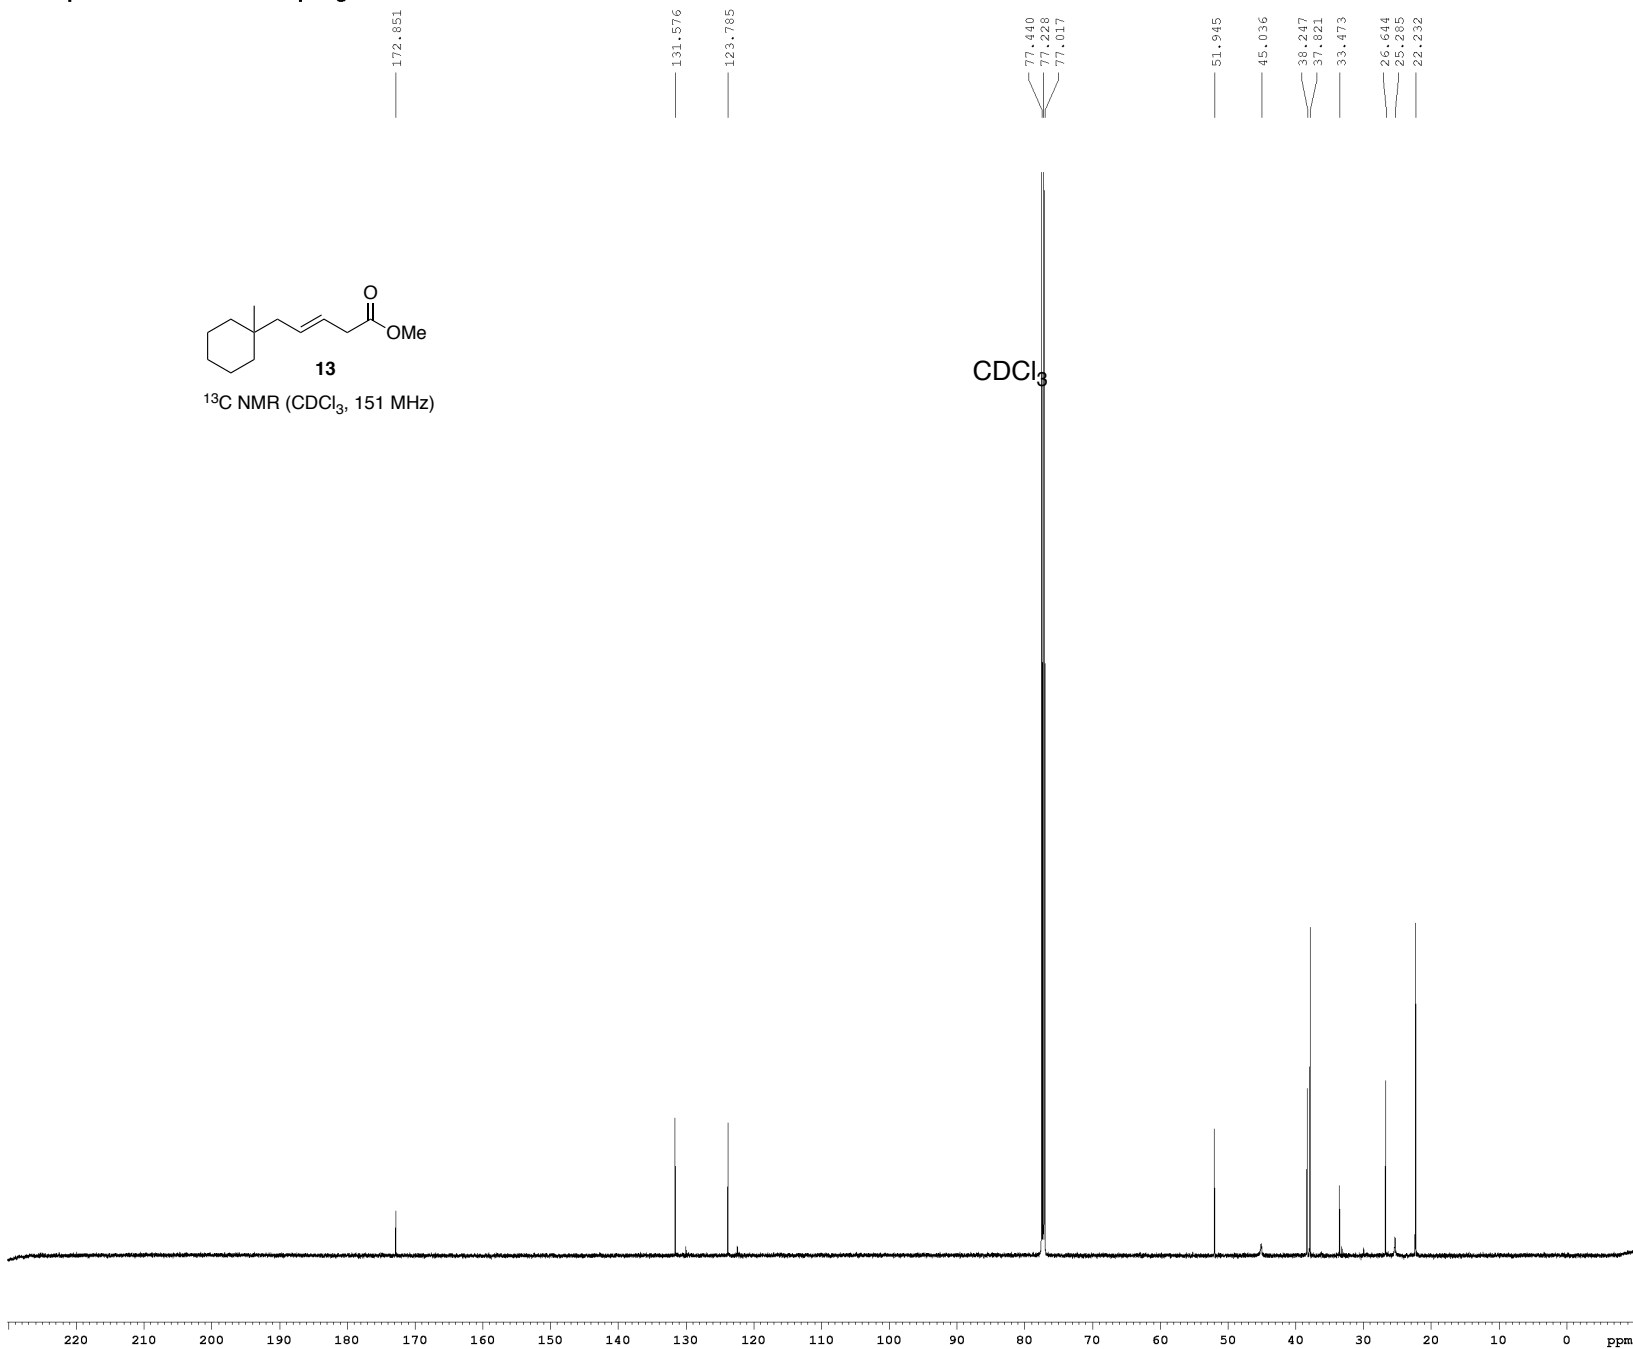

```

Current Data Parameters
NAME      F2-2151-C
EXPNO     4
PROCNO    1
DATAPATH  /v/data/zhaop3/nmr

F2 - Acquisition Parameters
Date_     20170426
Time      15.27
INSTRUM   av600
PROBHD    5 mm CPBBO BB-
PULPROG   zgpg30
TD         65536
SOLVENT   CDCl3
NS         300
DS         4
SWH        36231.883 Hz
FIDRES     0.552855 Hz
AQ         0.9043968 sec
RG         2050
DW         13.800 usec
DE         19.65 usec
TE         298.0 K
D1         0.40000001 sec
D11        0.03000000 sec
TD0        1

===== CHANNEL f1 =====
SFO1      150.9194080 MHz
NUC1       13C
P1        10.00 usec
PLW1      64.00000000 W

===== CHANNEL f2 =====
SFO2      600.1330010 MHz
NUC2       1H
CPDPRG2   waltz16
PCPD2     80.00 usec
PLW2      20.00000000 W
PLW12     0.36000001 W

F2 - Processing parameters
SI         65536
SF         150.9027825 MHz
WDW        EM
SSB        0
LB         1.00 Hz
GB         0
PC         1.00
    
```

<sup>1</sup>H spectrum with homodecoupling

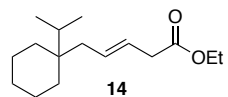

<sup>1</sup>H NMR (CDCl<sub>3</sub>, 600 MHz)

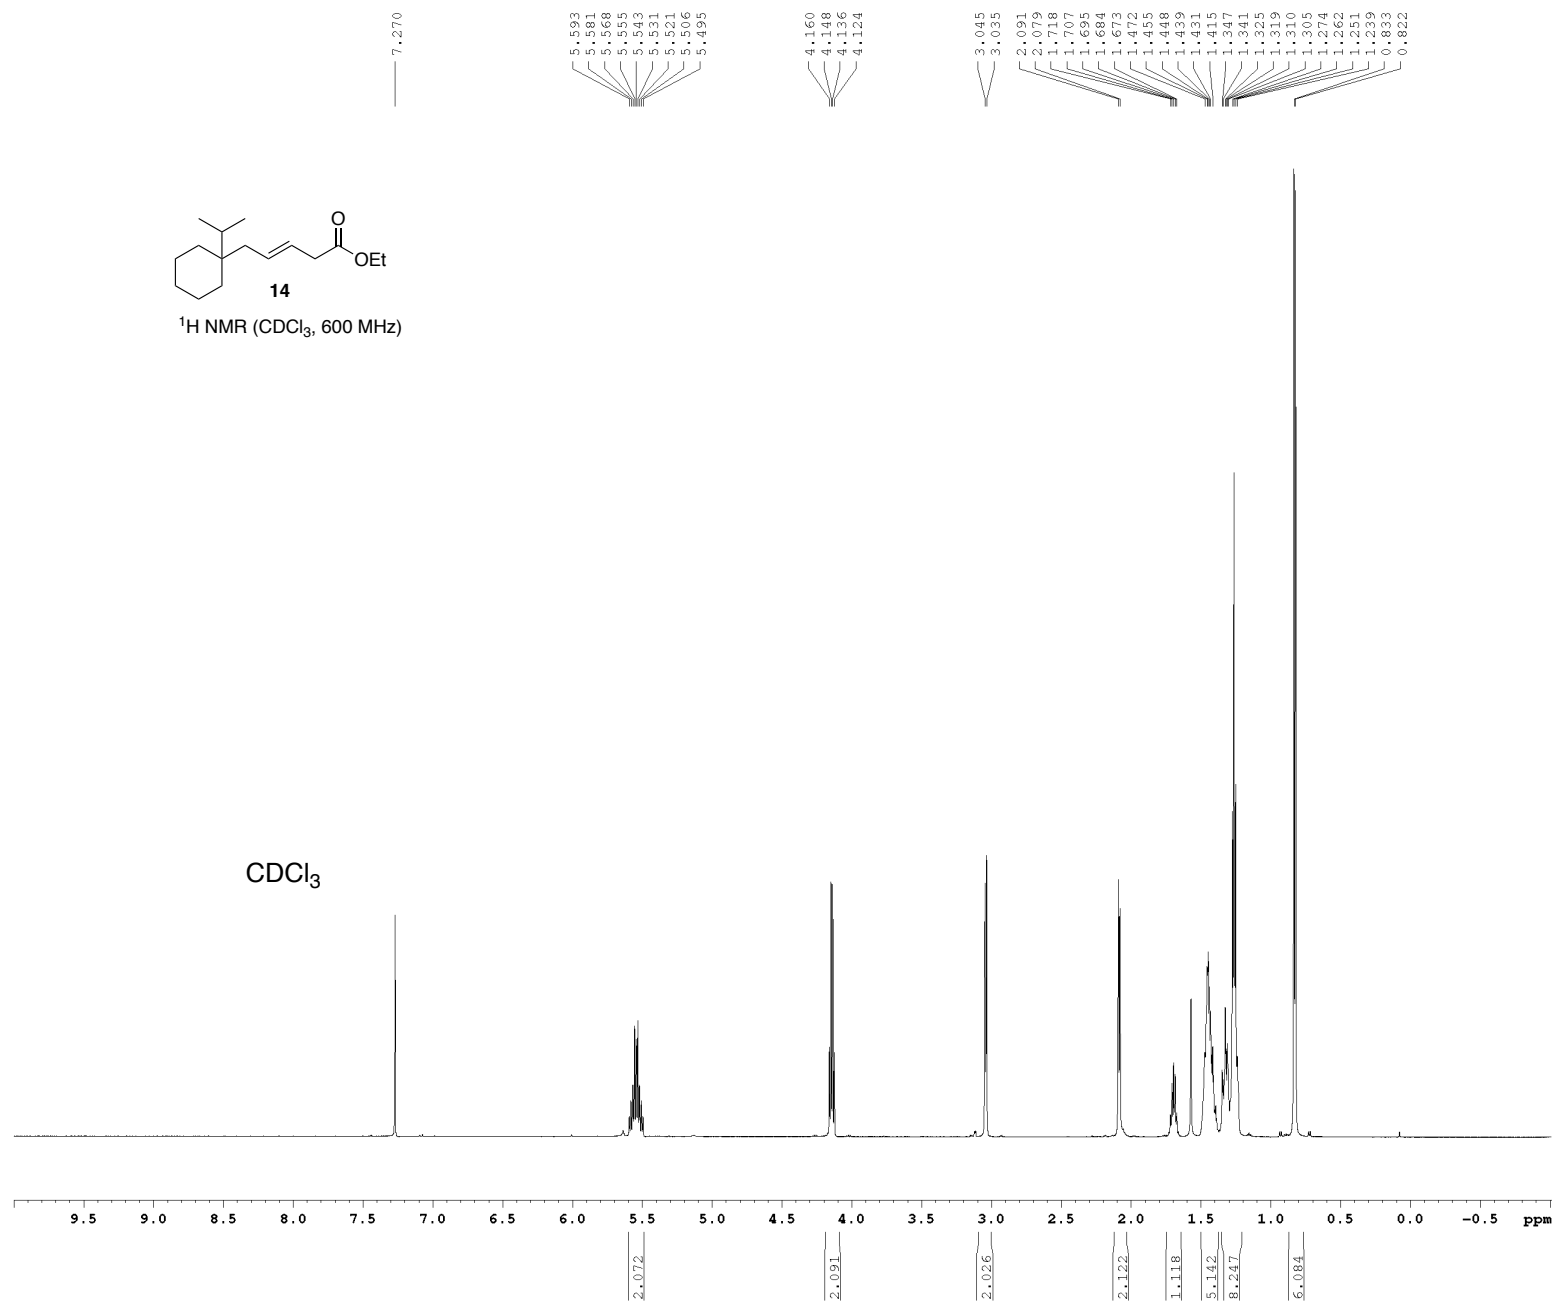

```

Current Data Parameters
NAME      FZ-2080-#7
EXPNO     3
PROCNO    1
DATE_     /v/data/zhaop3/nmr

F2 - Acquisition Parameters
Date_     20170223
Time      15.15
INSTRUM   av600
PROBHD    5 mm CPBBO BB-
PULPROG   zg30
TD         98074
SOLVENT    CDCl3
NS         8
DS         2
SWH        9615.385 Hz
FIDRES     0.098042 Hz
AQ         5.0998478 sec
RG         71.8
DW         52.000 usec
DE         13.70 usec
TE         298.0 K
D1         0.10000000 sec
TD0        1

===== CHANNEL f1 =====
SFO1      600.1342009 MHz
NUC1       1H
P1        12.00 usec
PLW1      20.00000000 W

F2 - Processing parameters
SI         65536
SF         600.1300294 MHz
WDW        EM
SSB        0
LB         0.30 Hz
GB         0
PC         1.00
    
```

# **<sup>13</sup>C spectrum with <sup>1</sup>H decoupling**

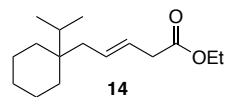

<sup>13</sup>C NMR (CDCl<sub>3</sub>, 151 MHz)

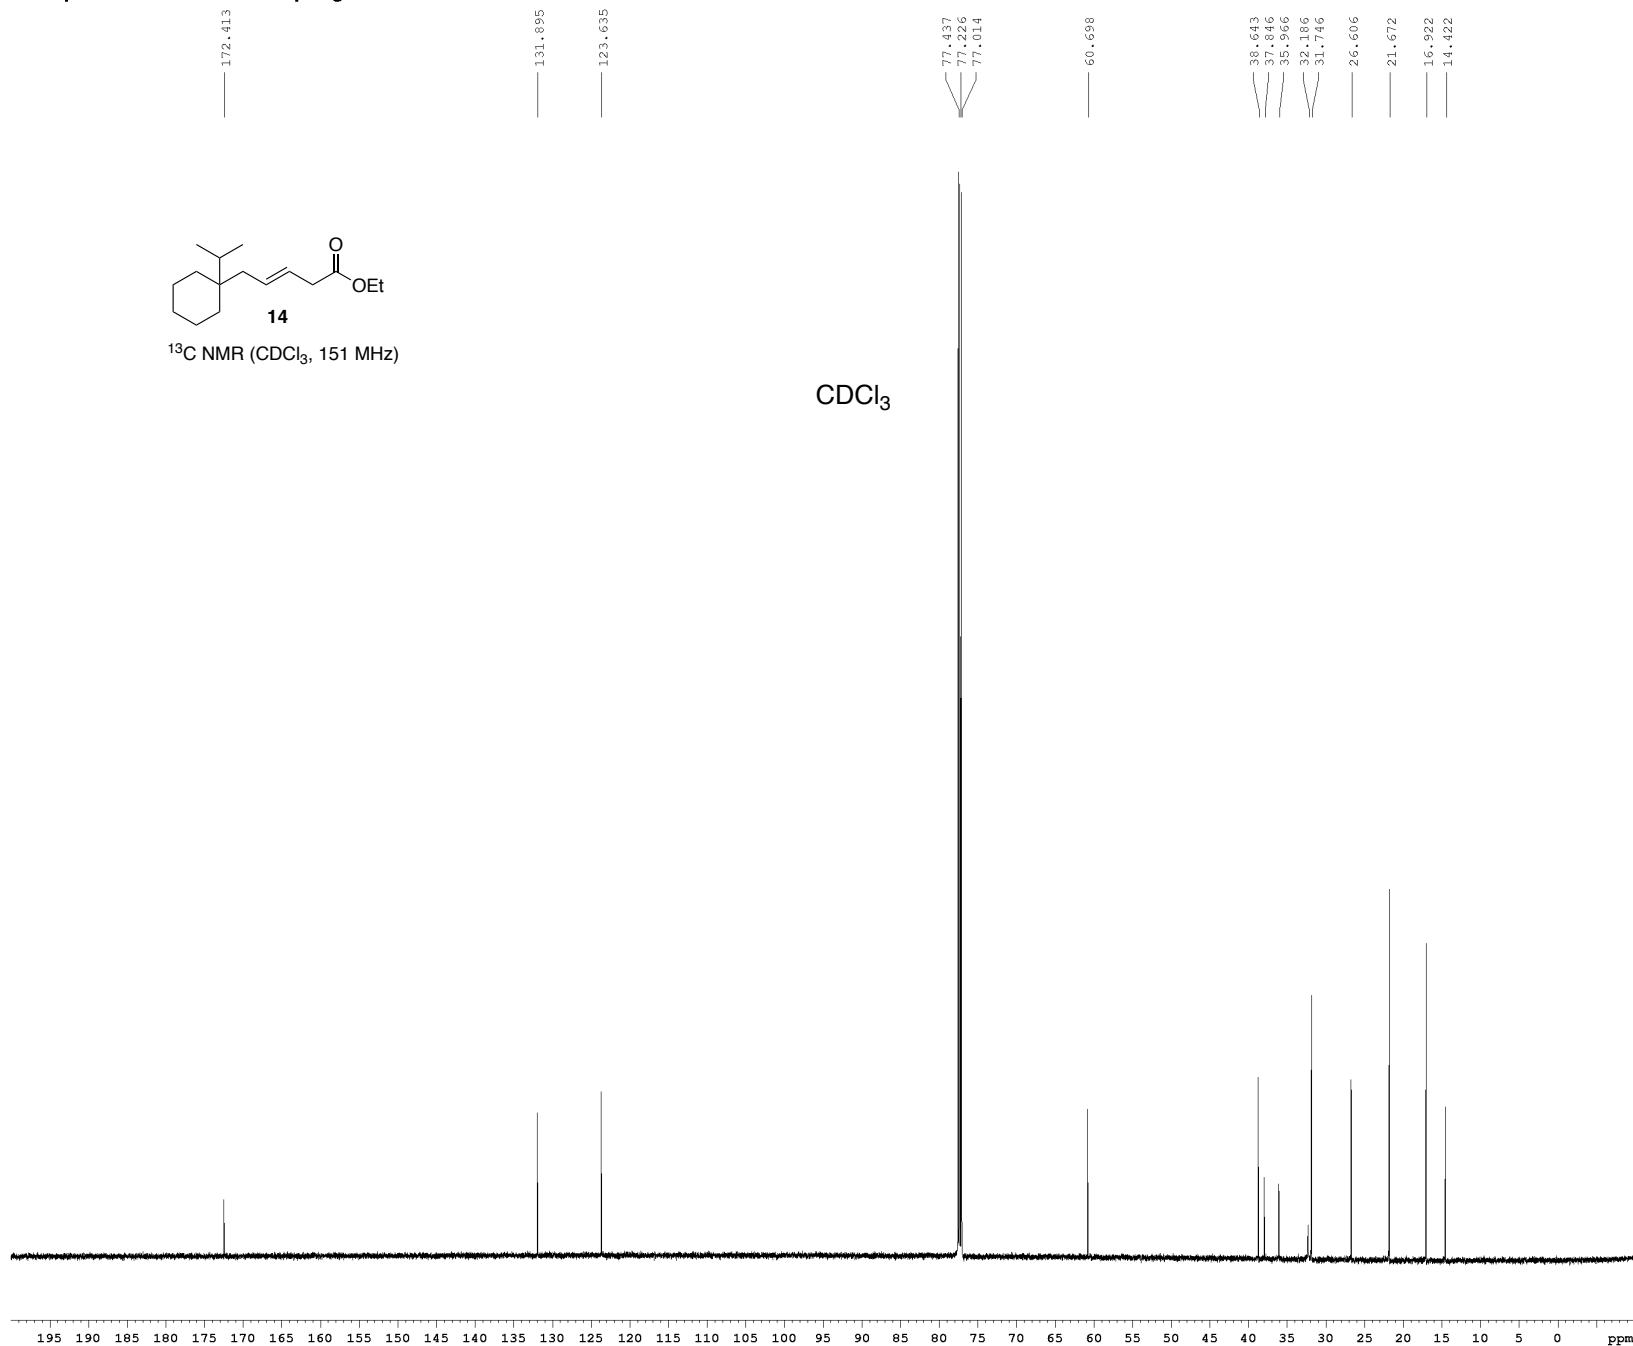

```

Current Data Parameters
NAME      F2-2080-#7
EXPNO     6
PROCNO    1
DATPATH   /v/data/zhaop3/nmr

F2 - Acquisition Parameters
Date_     20170223
Time      15.26
INSTRUM   av600
PROBHD    5 mm CPBBO BB-
PULPROG   zgpg30
TD         65536
SOLVENT   CDCl3
NS         90
DS         4
SWH        36231.883 Hz
FIDRES     0.552855 Hz
AQ         0.9043968 sec
RG         2050
DW         13.800 usec
DE         19.65 usec
TE         298.0 K
D1         0.40000001 sec
D11        0.03000000 sec
TD0        1

===== CHANNEL f1 =====
SFO1      150.9194080 MHz
NUC1       13C
P1         10.00 usec
PLW1       64.00000000 W

===== CHANNEL f2 =====
SFO2      600.1330010 MHz
NUC2       1H
CPDPRG2    waltz16
PCPD2      80.00 usec
PLW2       20.00000000 W
PLW12      0.36000001 W

F2 - Processing parameters
SI         65536
SF         150.9027831 MHz
WDW        EM
SSB        0
LB         1.00 Hz
GB         0
PC         1.00
    
```

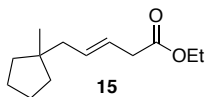

<sup>1</sup>H NMR (CDCl<sub>3</sub>, 600 MHz)

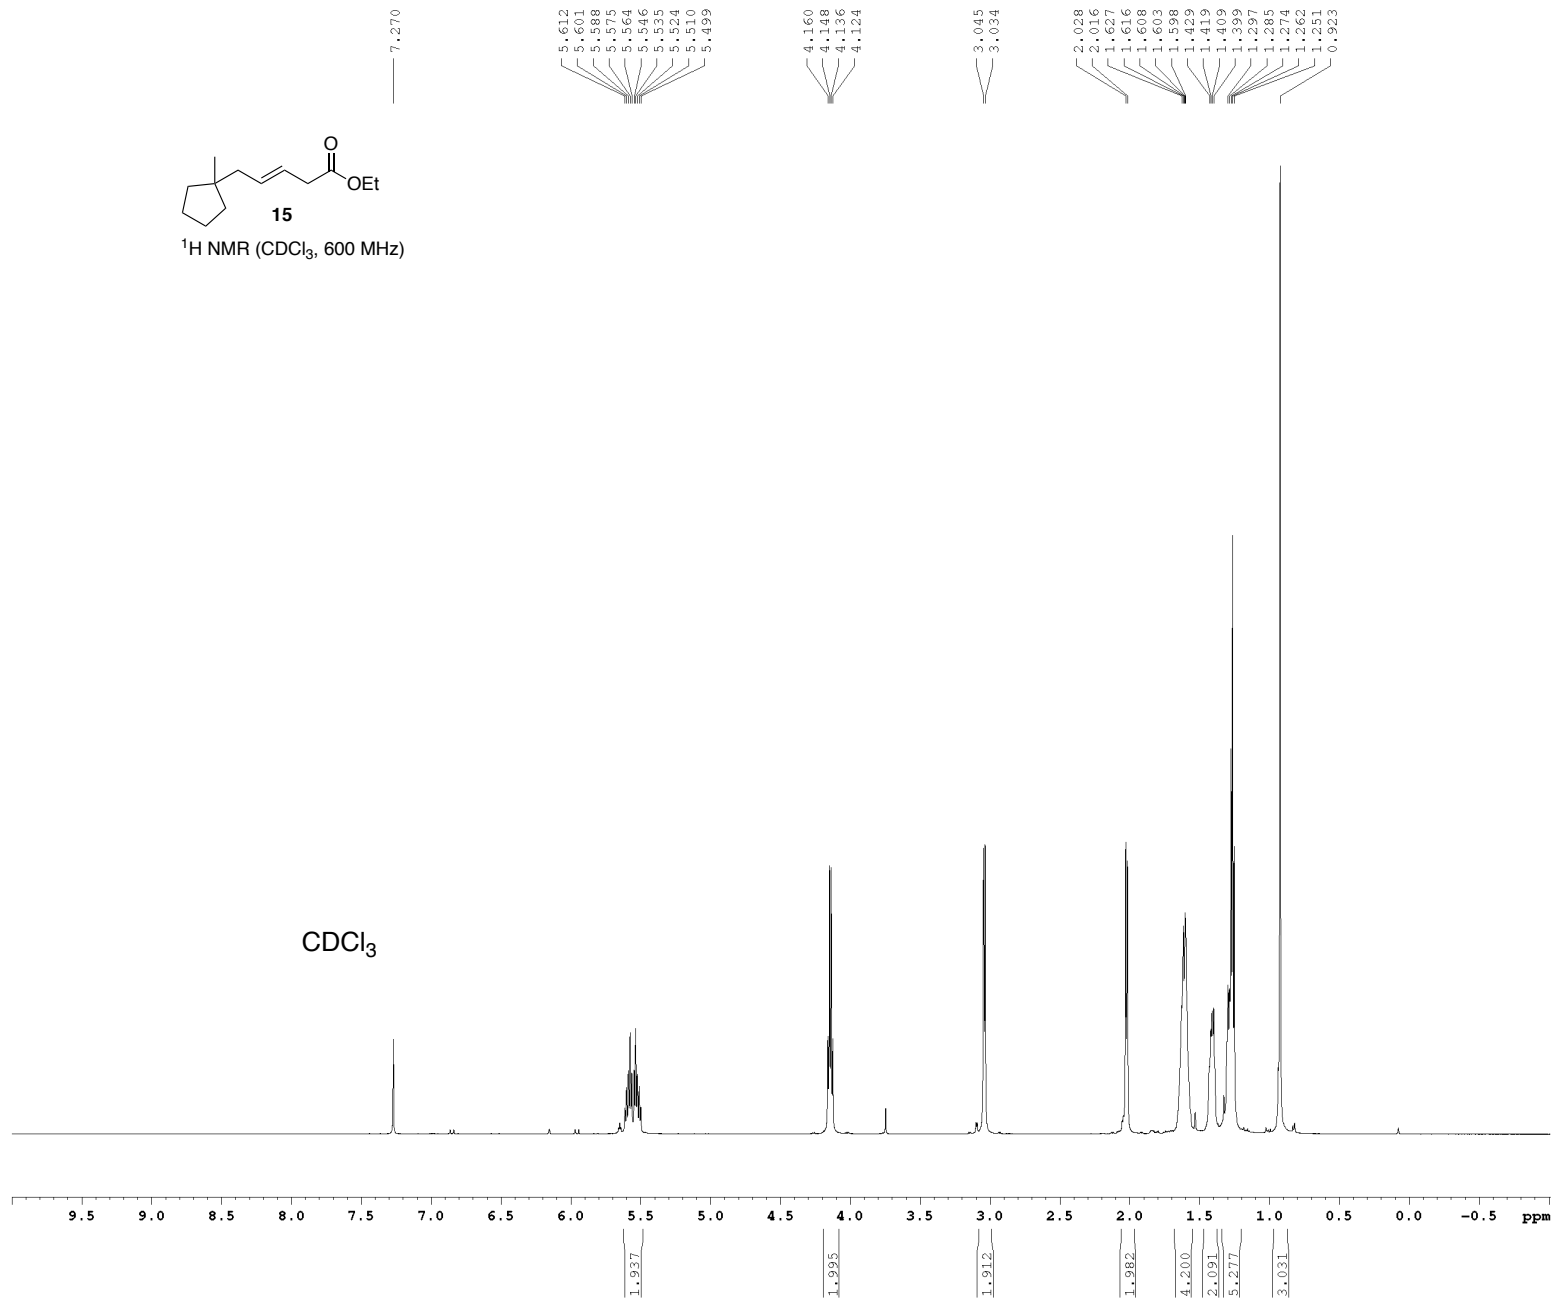

Current Data Parameters  
NAME PZ-2081-P  
EXPNO 4  
PROCNO 1  
DATPATH /v/data/zhaop3/nmr

F2 - Acquisition Parameters  
Date\_ 20170225  
Time 18.12  
INSTRUM av600  
PROBHD 5 mm CPBBO BB-  
PULPROG zg30  
TD 98074  
SOLVENT CDCl3  
NS 8  
DS 2  
SWH 9615.385 Hz  
FIDRES 0.098042 Hz  
AQ 5.0998478 sec  
RG 28.5  
DW 52.000 usec  
DE 13.70 usec  
TE 298.0 K  
D1 0.10000000 sec  
TD0 1

===== CHANNEL f1 =====  
SFO1 600.1342009 MHz  
NUC1 1H  
P1 12.00 usec  
PLW1 20.00000000 W

F2 - Processing parameters  
SI 65536  
SF 600.1300292 MHz  
WDW EM  
SSB 0  
LB 0.30 Hz  
GB 0  
PC 1.00



# **<sup>13</sup>C spectrum with <sup>1</sup>H decoupling**

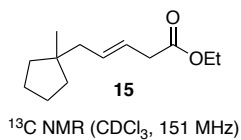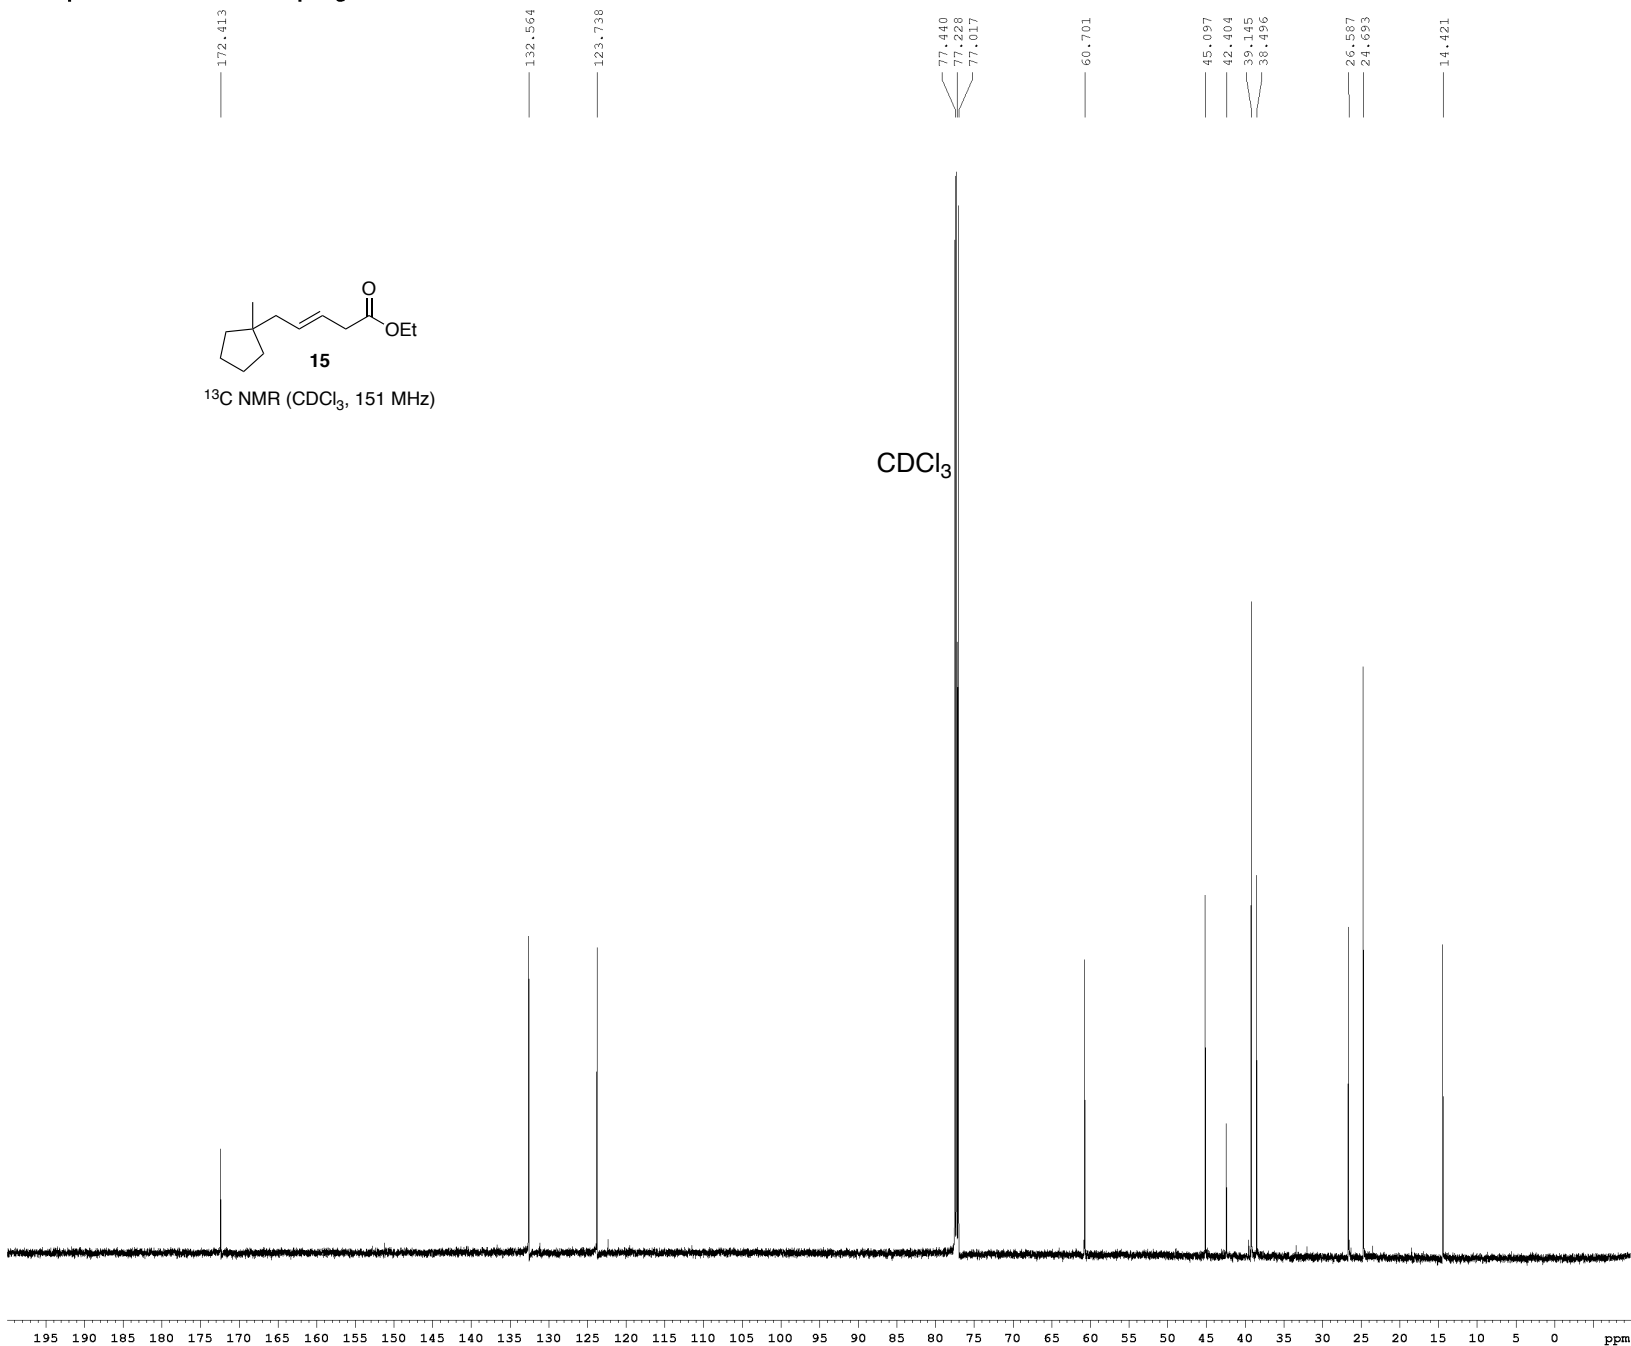

```

Current Data Parameters
NAME      F2-2081-P
EXPNO     5
PROCNO    1
DATPATH   /v/data/zhaop3/nmr

F2 - Acquisition Parameters
Date_     20170225
Time      15.15
INSTRUM   av600
PROBHD    5 mm CPBBO BB-
PULPROG   zgpg30
TD         65536
SOLVENT   CDCl3
NS         58
DS         4
SWH        36231.883 Hz
FIDRES     0.552855 Hz
AQ         0.9043968 sec
RG         2050
DW         13.800 usec
DE         19.65 usec
TE         298.0 K
D1         0.40000001 sec
D11        0.03000000 sec
TD0        1

===== CHANNEL f1 =====
SF01      150.9194080 MHz
NUC1       13C
P1        10.00 usec
PLW1      64.00000000 W

===== CHANNEL f2 =====
SF02      600.1330010 MHz
NUC2       1H
CPDPRG2   waltz16
PCPD2     80.00 usec
PLW2      20.00000000 W
PLW12     0.36000001 W

F2 - Processing parameters
SI         65536
SF         150.9027831 MHz
WDW        EM
SSB        0
LB         1.00 Hz
GB         0
PC         1.00
  
```

<sup>1</sup>H spectrum

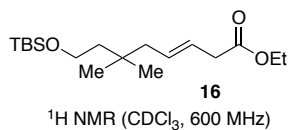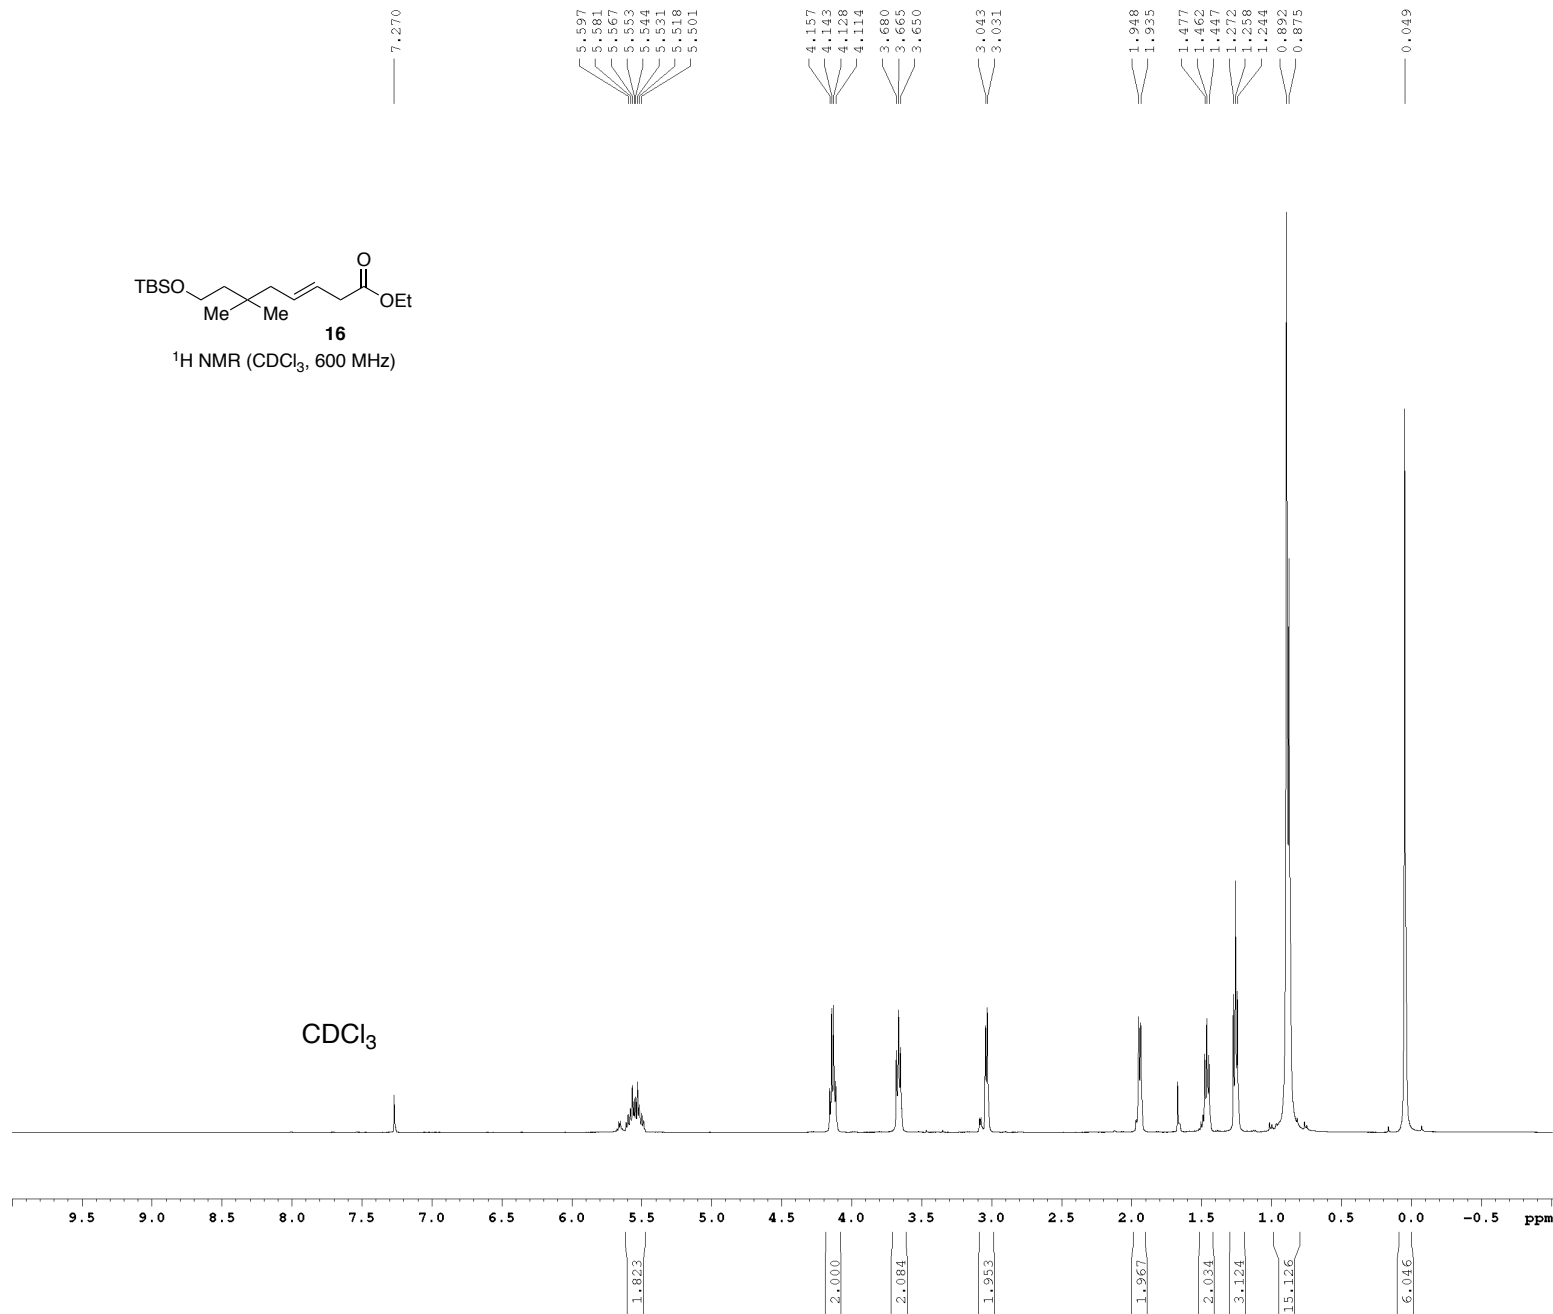

Current Data Parameters  
 NAME SL-100-1H  
 EXPNO 1  
 PROCNO 1  
 DATPATH /v/data/zhaop3/nmr

F2 - Acquisition Parameters  
 Date\_ 20180322  
 Time 12.19  
 INSTRUM cryo500  
 PROBHD 5 mm CPTCI 1H-  
 PULPROG zg30  
 TD 81728  
 SOLVENT CDCl3  
 NS 8  
 DS 2  
 SWH 8012.820 Hz  
 FIDRES 0.098043 Hz  
 AQ 5.0998273 sec  
 RG 3.6  
 DW 62.400 usec  
 DE 6.00 usec  
 TE 298.0 K  
 D1 0.10000000 sec  
 MCREST 0 sec  
 MCWRK 0.01500000 sec

===== CHANNEL f1 =====  
 NUC1 1H  
 P1 7.50 usec  
 PL1 1.60 dB  
 SFO1 500.2235015 MHz

F2 - Processing parameters  
 SI 65536  
 SF 500.2200267 MHz  
 WDW EM  
 SSB 0  
 LB 0.30 Hz  
 GB 0  
 PC 4.00

# Z-restored spin-echo <sup>13</sup>C spectrum with <sup>1</sup>H decoupling

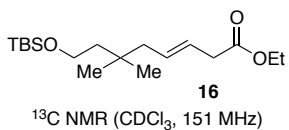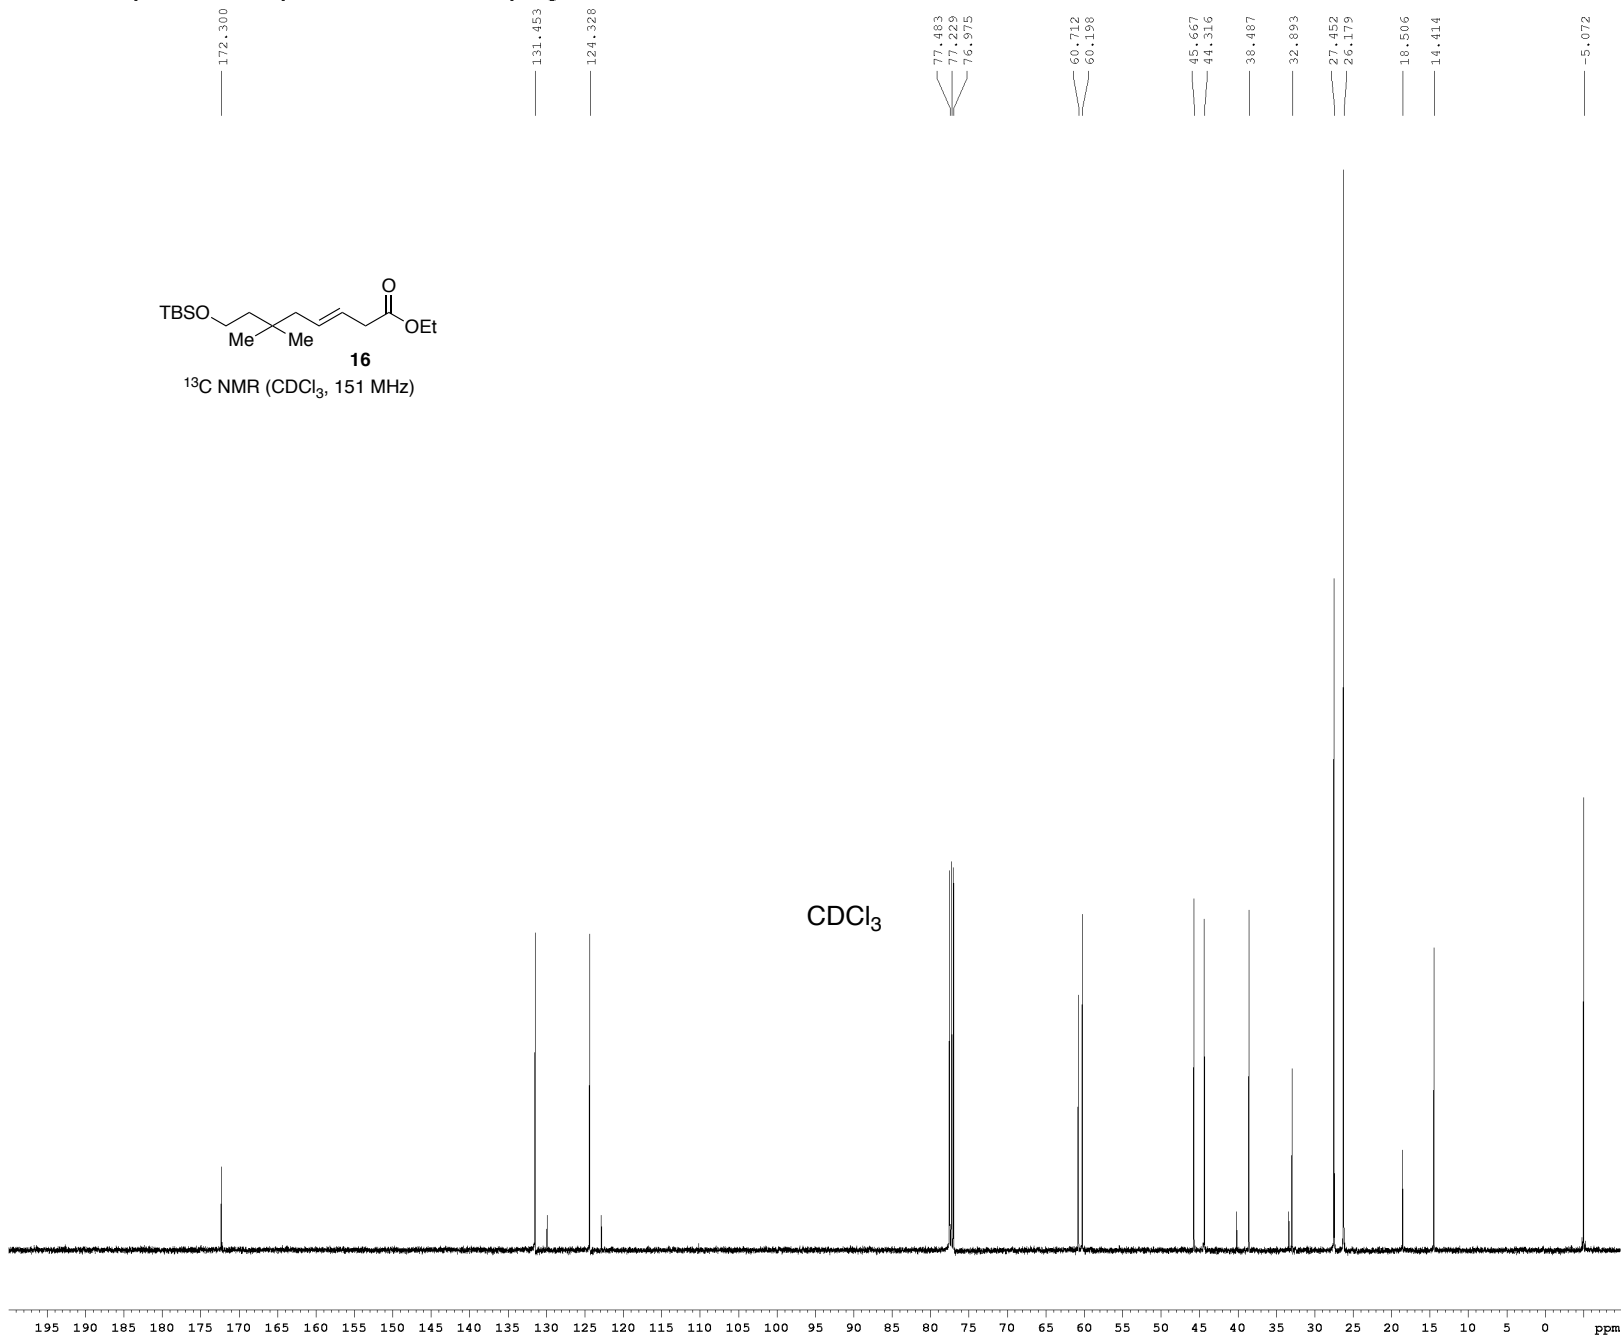

```

Current Data Parameters
NAME      SL-100-13C
EXPNO     1
PROCNO    1
DATAPATH  /v/data/zhaop3/nmr

F2 - Acquisition Parameters
Date_     20161005
Time      19.50
INSTRUM   cryo500
PROBHD    5 mm CPTCI 1H-
PULPROG   SpinEchopg30gp.prd
TD         65536
SOLVENT   CDCl3
NS         256
DS         16
SWH        30303.051 Hz
FIDRES     0.462388 Hz
AQ         1.0813440 sec
RG         4096
DW         16.500 usec
DE         6.00 usec
TE         298.0 K
D1         0.25000000 sec
d11        0.03000000 sec
D16        0.00020000 sec
d17        0.00019600 sec
MCREST     0 sec
MCWRK      0.01500000 sec
F2         33.10 usec

===== CHANNEL f1 =====
NUC1        13C
P1         16.55 usec
P11        500.00 usec
P12        2000.00 usec
PL0        120.00 dB
PL1        -1.00 dB
SFO1       125.7942548 MHz
SP1         2.70 dB
SF2         2.70 dB
SFOFF1      Crp60, 0.5, 20.1
SFOFF2      Crp60comp.4
SFOFF2      0 Hz

===== CHANNEL f2 =====
CPDPRG2    waltz16
NUC2        1H
PCPD2      100.00 usec
PL2        1.60 dB
PL12       24.50 dB
SFO2       500.2225011 MHz

===== GRADIENT CHANNEL =====
GPNAM[1]    SINE.100
GPNAM[2]    SINE.100
GPX1        0 %
GPY1        0 %
GPZ1        0 %
GPX2        0 %
GPY2        0 %
GPZ2        30.00 %
GPZ2        50.00 %
PL5         500.00 usec
PL6         1000.00 usec

F2 - Processing parameters
SI         65536
SF         125.7803996 MHz
WDW        EM
SSB        0
LB         1.00 Hz
GB         0
PC         2.00
  
```

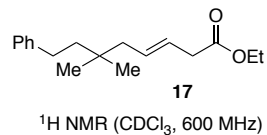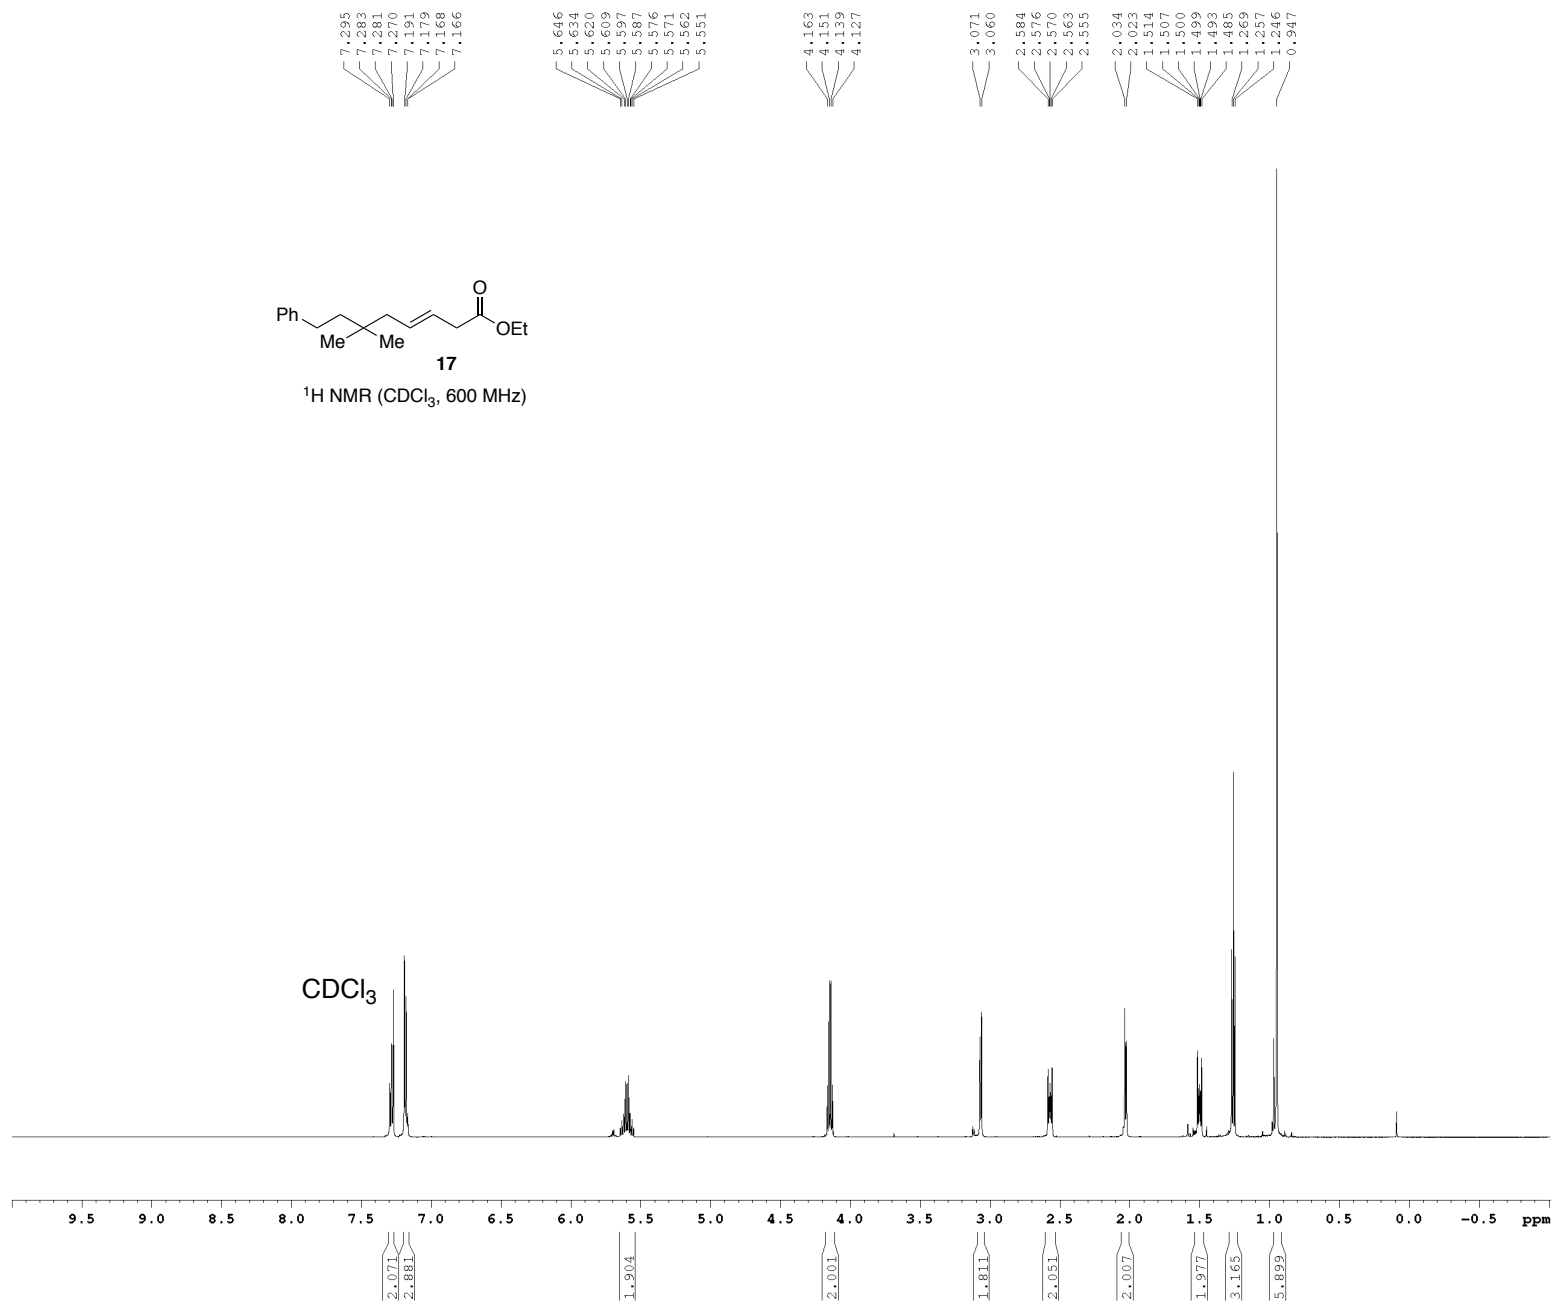

Current Data Parameters

NAME PZ-2151-A  
 EXPNO 1  
 PROCNO 1  
 DATPATH /v/data/zhaop3/nmr

F2 - Acquisition Parameters

Date\_ 20170421  
 Time 11.31  
 INSTRUM av600  
 PROBHD 5 mm CPBBO BB-  
 PULPROG zg30  
 TD 98074  
 SOLVENT CDCl3  
 NS 8  
 DS 2  
 SWH 9615.385 Hz  
 FIDRES 0.098042 Hz  
 AQ 5.0998478 sec  
 RG 18  
 DW 52.000 usec  
 DE 13.70 usec  
 TE 298.0 K  
 D1 0.10000000 sec  
 TD0 1

===== CHANNEL f1 =====

SFO1 600.1342009 MHz  
 NUC1 1H  
 P1 12.00 usec  
 PLW1 20.00000000 W

F2 - Processing parameters

SI 65536  
 SF 600.1300279 MHz  
 WDW EM  
 SSB 0  
 LB 0.30 Hz  
 GB 0  
 PC 1.00

# Z-restored spin-echo 13C spectrum with 1H decoupling

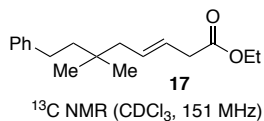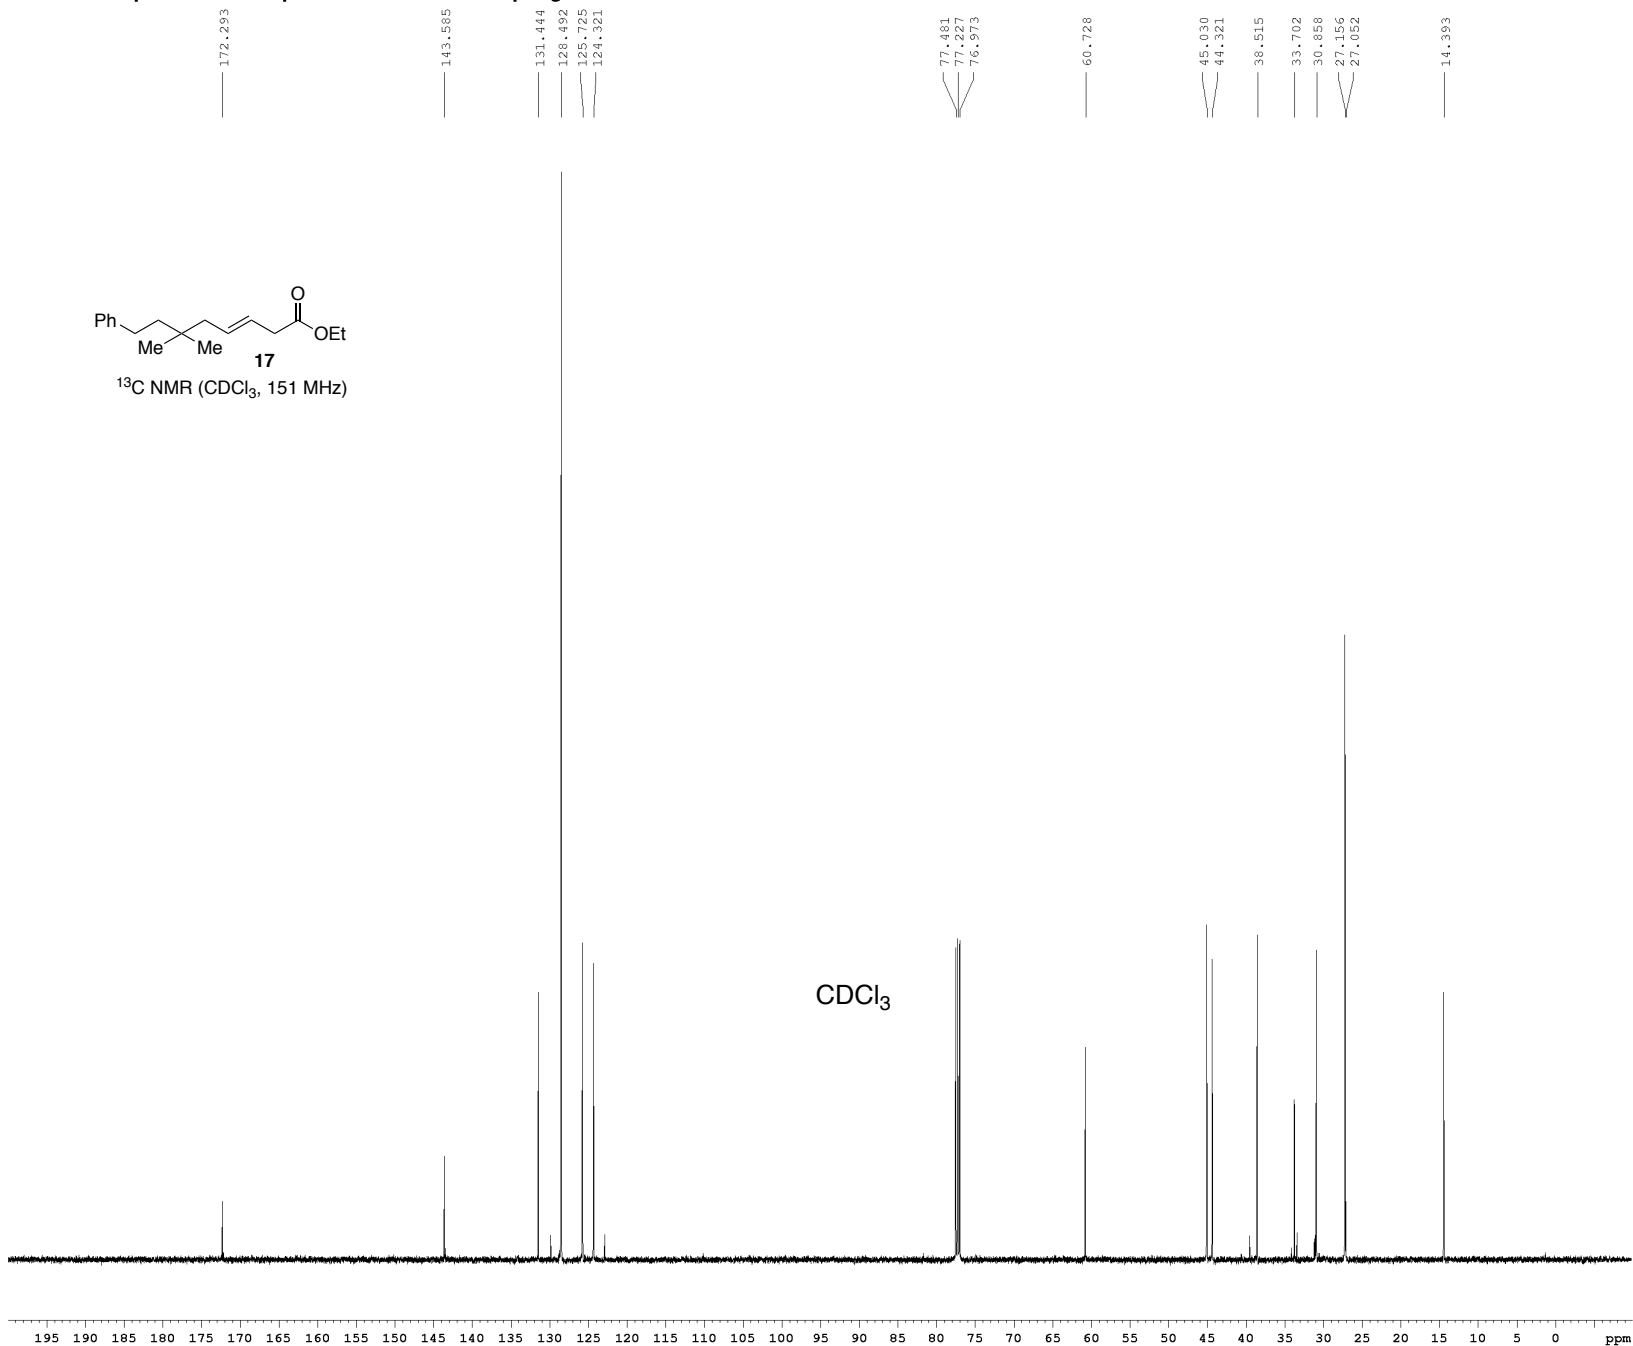

```

Current Data Parameters
NAME      SL-96-13C
EXPNO     1
PROCNO    1
DATPATH   /v/data/zhaop3/nmr

F2 - Acquisition Parameters
Date_     20161005
Time      19.18
INSTRUM    cryo500
PROBHD     5 mm CPTCI 1H-
PULPROG    SpinEcho30pp.prd
TD          65536
SOLVENT     CDCl3
NS          256
DS          16
SWH         30303.031 Hz
FIDRES      0.462388 Hz
AQ          1.0813440 sec
RG          7298.2
DW          16.500 usec
DE          6.00 usec
TE          298.0 K
D1          0.25000000 sec
d11         0.03000000 sec
D16         0.00020000 sec
d17         0.00019600 sec
MCREST      0 sec
MCWRK      0.01500000 sec
F2          33.10 usec

===== CHANNEL f1 =====
NUC1         13C
P1          16.55 usec
P11         500.00 usec
P12         2000.00 usec
PL0         120.00 dB
PL1         -1.00 dB
SFO1        125.7942548 MHz
SP1          2.70 dB
SP2          2.70 dB
SFO2         500.2225011 MHz
SFO12        500.2225011 MHz

===== CHANNEL f2 =====
CPDPRG2      waltz16
NUC2          1H
PCPD2        100.00 usec
PL2          1.60 dB
PL12         24.50 dB
SFO2         500.2225011 MHz

===== GRADIENT CHANNEL =====
GPNAM[1]     SINE.100
GPNAM[2]     SINE.100
GPX1         0 %
GPX2         0 %
GPY1         0 %
GPY2         0 %
GPR1         30.00 %
GPR2         50.00 %
p15          500.00 usec
p16         1000.00 usec

F2 - Processing parameters
SI           65536
SF           125.7804033 MHz
WDW          EM
SSB          0
LB           1.00 Hz
GB           0
PC           2.00
  
```

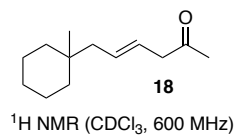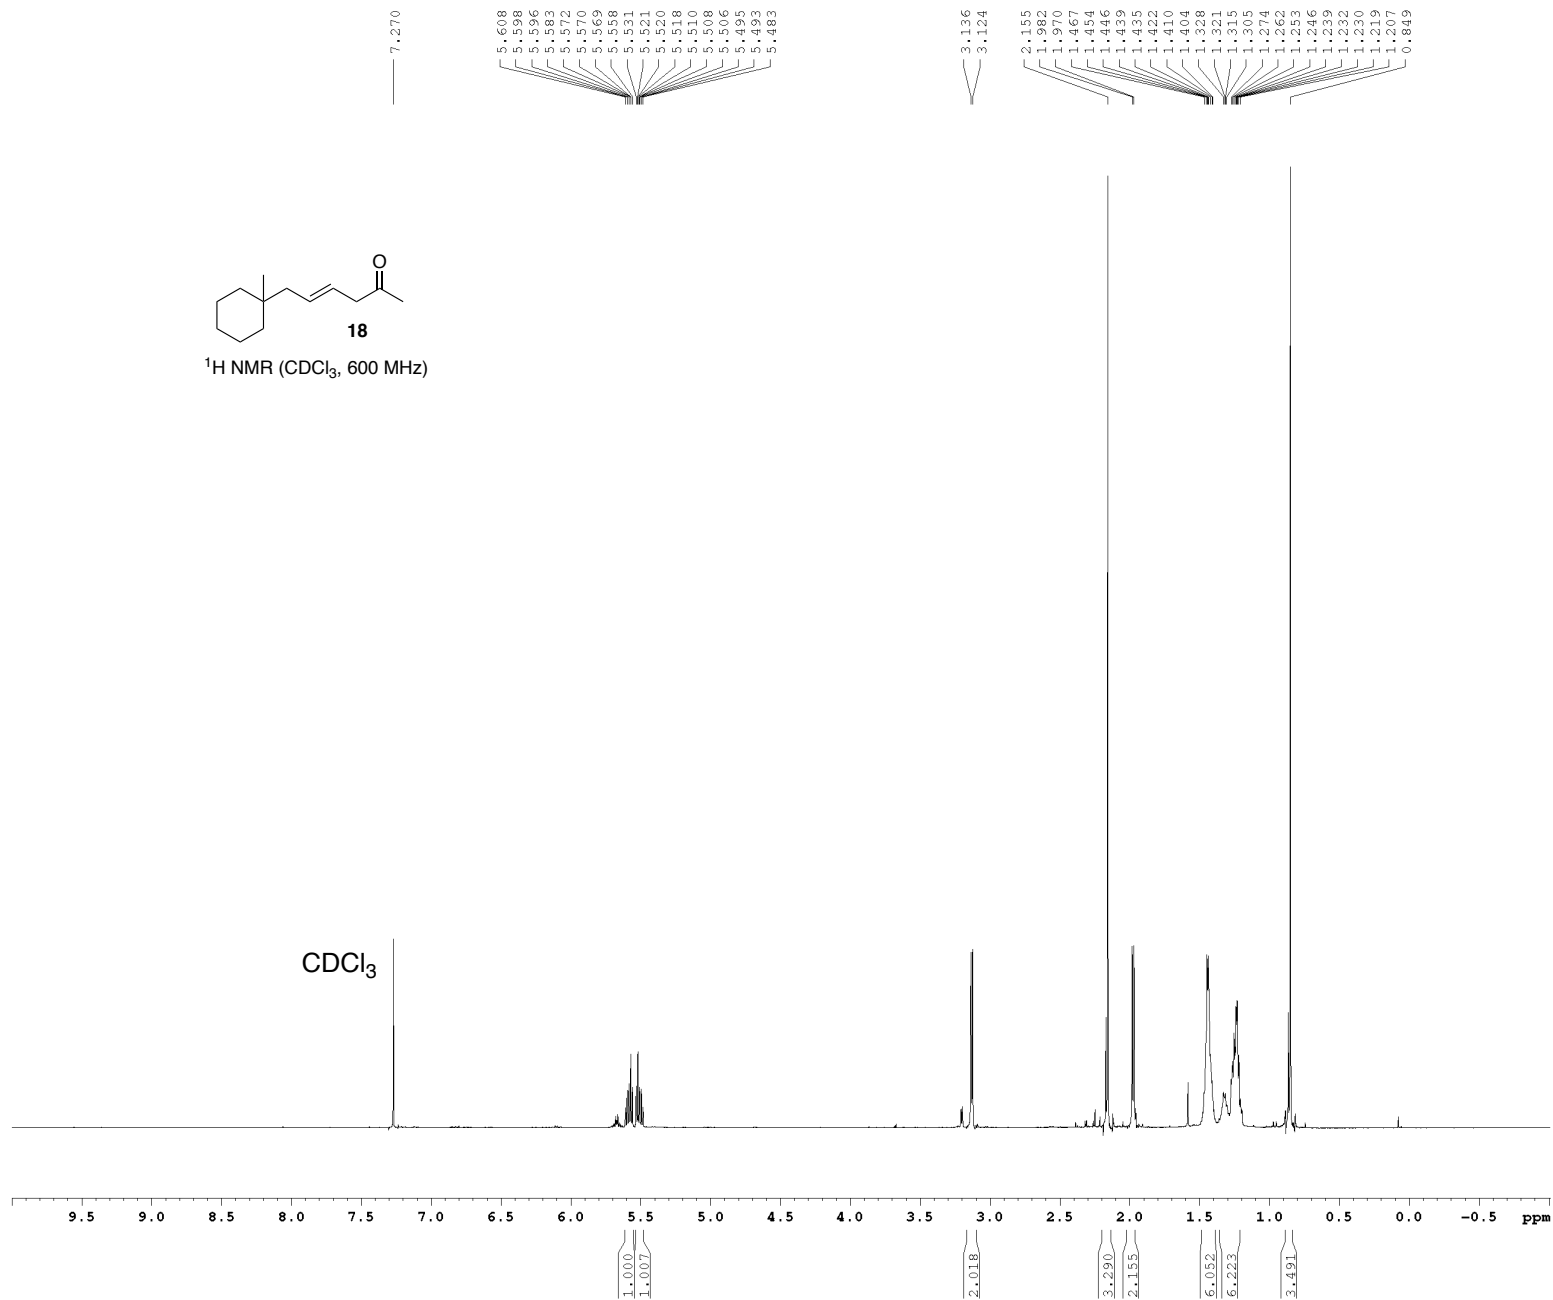

Current Data Parameters

NAME PZ-2151-B

EXPNO 1

PROCNO 1

DATPATH /v/data/zhaop3/nmr

F2 - Acquisition Parameters

Date\_ 20170421

Time 11.44

INSTRUM av600

PROBHD 5 mm CPBBO BB-

PULPROG zg30

TD 98074

SOLVENT CDCl3

NS 8

DS 2

SWH 9615.385 Hz

FIDRES 0.098042 Hz

AQ 5.0998478 sec

RG 20.2

DW 52.000 usec

DE 13.70 usec

TE 298.0 K

D1 0.10000000 sec

TD0 1

===== CHANNEL f1 =====

SFO1 600.1342009 MHz

NUC1 1H

P1 12.00 usec

PLW1 20.00000000 W

F2 - Processing parameters

SI 65536

SF 600.1300279 MHz

WDW EM

SSB 0

LB 0.30 Hz

GB 0

PC 1.00

# Z-restored spin-echo <sup>13</sup>C spectrum with 1H decoupling

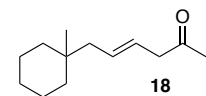

<sup>13</sup>C NMR (CDCl<sub>3</sub>, 151 MHz)

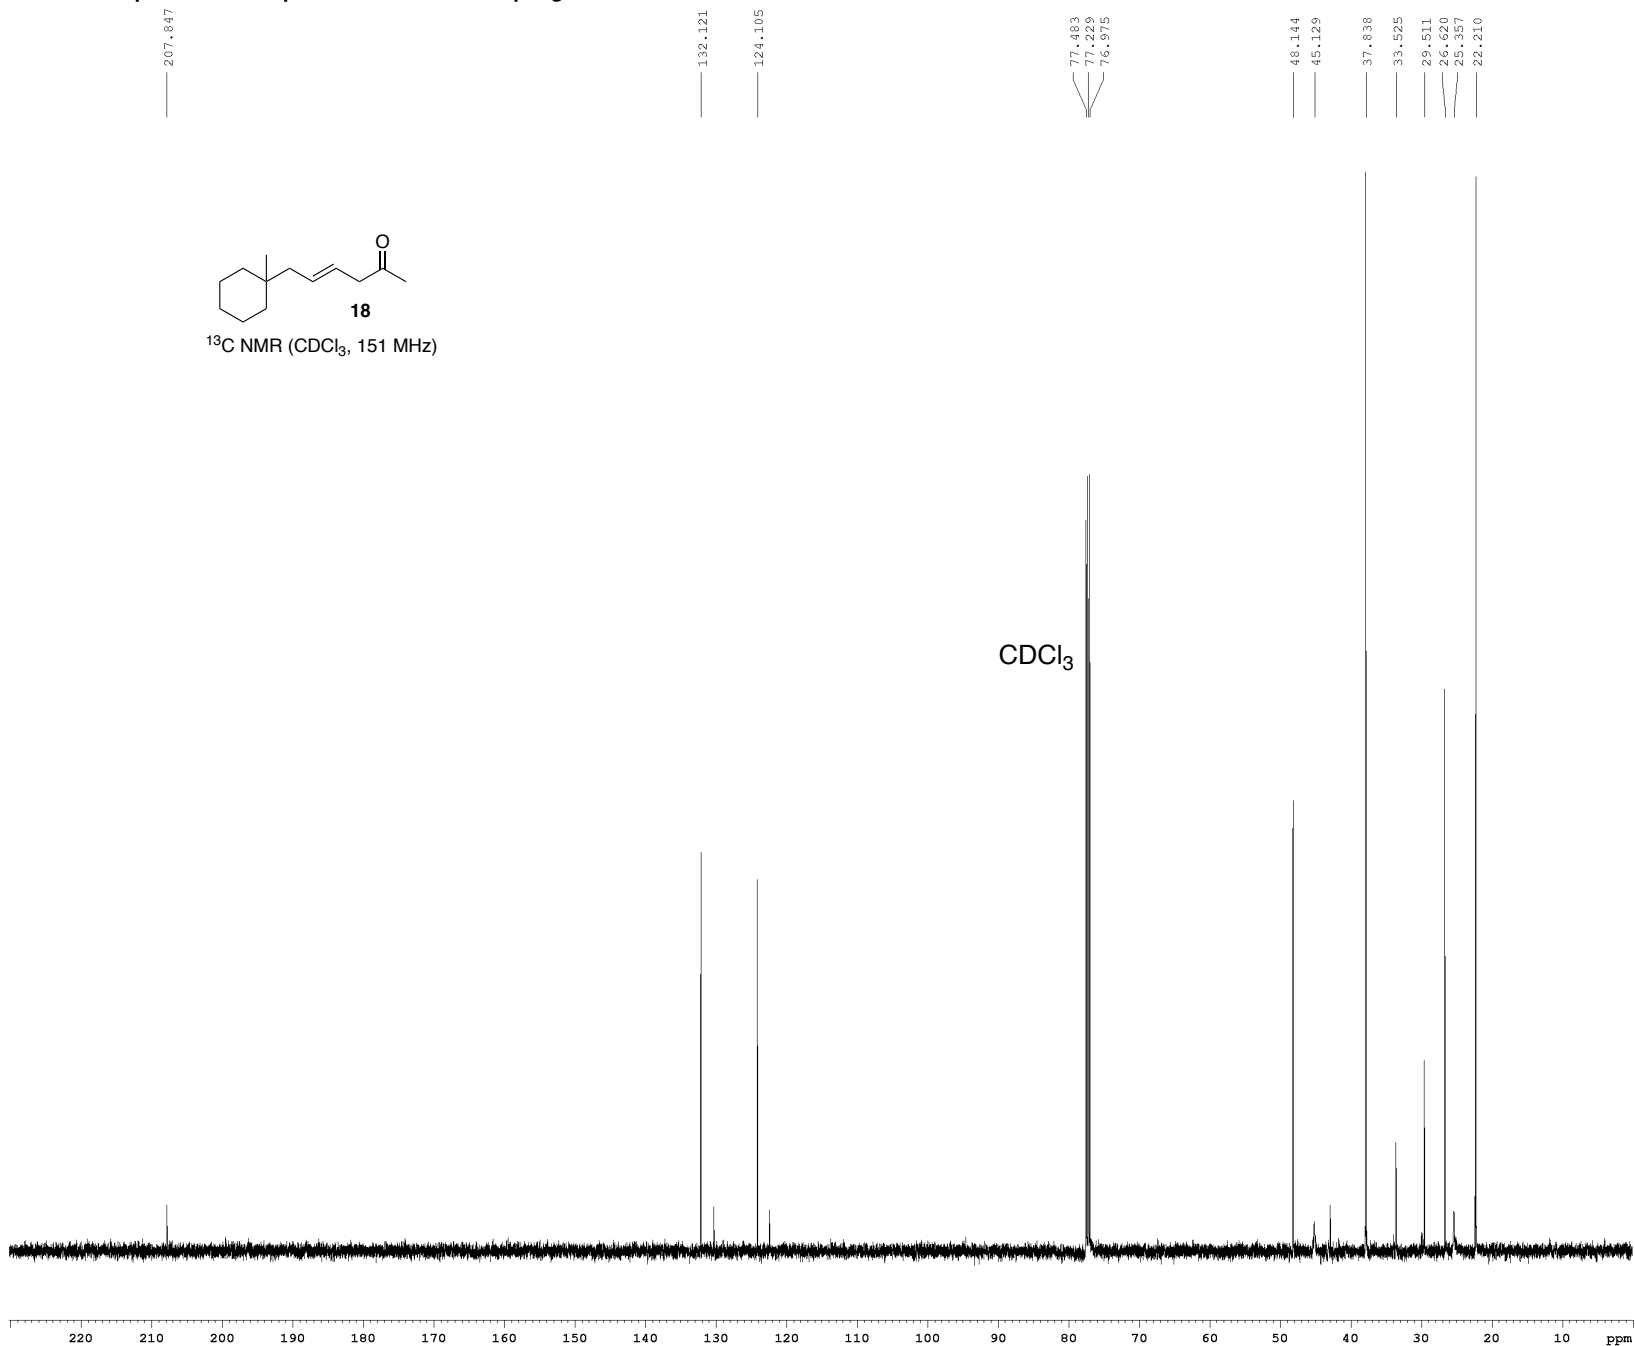

```

Current Data Parameters
NAME      F2-2151-B
EXPNO     5
PROCNO    1
DATPATH   /v/data/zhaop3/nmr

F2 - Acquisition Parameters
Date_     20170421
Time      17.34
INSTRUM   cryo500
PROBHD    5 mm CPTCI 1H-
PULPROG   SpinEcho300pp.prd
TD         65536
SOLVENT   CDCl3
NS         449
DS         16
SWH        30303.031 Hz
FIDRES     0.462388 Hz
AQ         1.0813440 sec
RG         3649.1
DW         16.500 usec
DE         6.00 usec
TE         298.0 K
D1         0.25000000 sec
d11        0.03000000 sec
D16        0.00020000 sec
d17        0.00019600 sec
MCREST     0 sec
MCWRK      0.01500000 sec
F2         33.10 usec

===== CHANNEL f1 =====
NUC1       13c
P1         16.55 usec
P11        500.00 usec
P12        2000.00 usec
PL0        120.00 dB
PL1        -1.00 dB
SFO1       125.7942548 MHz
SF1         2.70 dB
SF2         2.70 dB
SFBAM[1]   Crp60,0.5,20.1
SFBAM[2]   Crp60comp.4
SFOFF1     0 Hz
SFOFF2     0 Hz

===== CHANNEL f2 =====
CPDPRG2    waltz16
NUC2       1H
PCPD2      100.00 usec
PL2        1.60 dB
PL12       24.50 dB
SFO2       500.2225011 MHz

===== GRADIENT CHANNEL =====
GFBAM[1]   SINE.100
GFBAM[2]   SINE.100
GFX1       0 %
GFX2       0 %
GPY1       0 %
GPY2       0 %
GPD1       30.00 %
GPD2       50.00 %
p15        500.00 usec
p16        1000.00 usec

F2 - Processing parameters
SI         65536
SF         125.7803992 MHz
WDW        EM
SSB        0
LB         1.00 Hz
GB         0
PC         2.00
    
```

<sup>1</sup>H spectrum

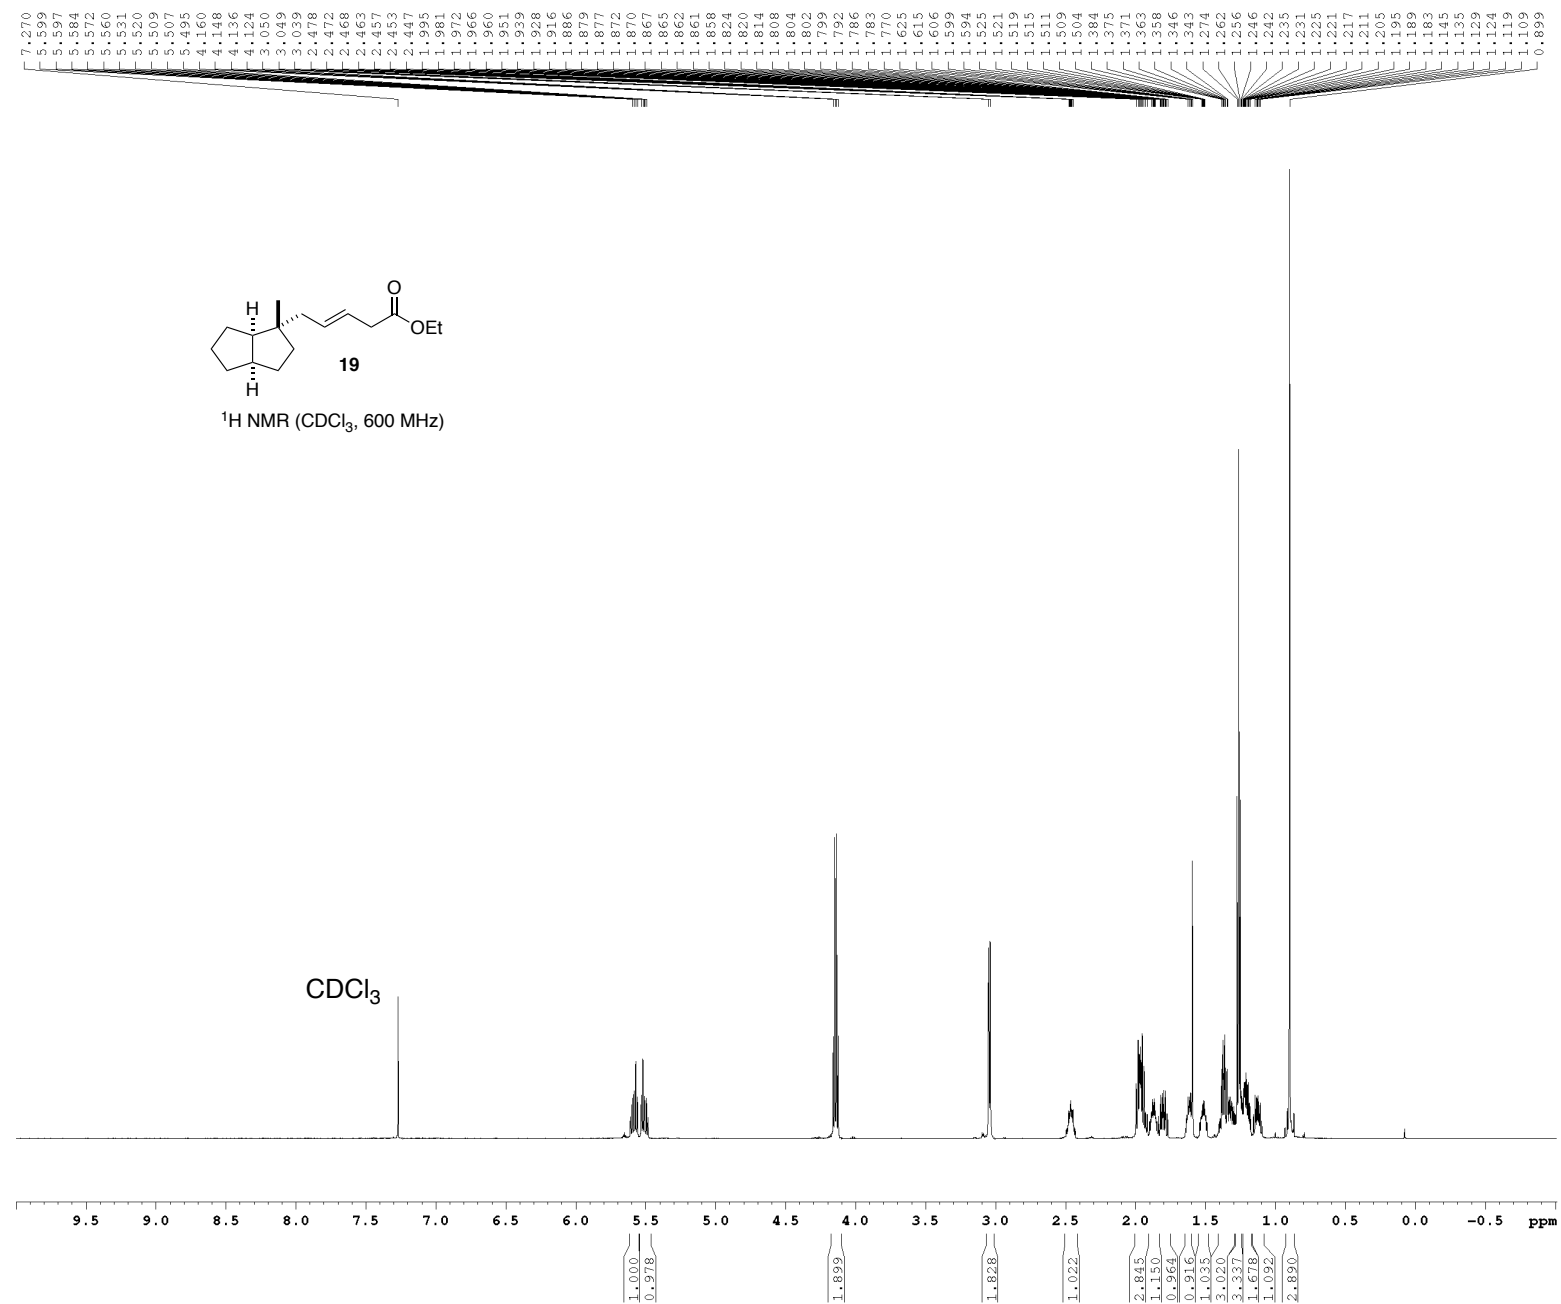

Current Data Parameters  
 NAME PZ-4044-C  
 EXPNO 1  
 PROCNO 1  
 DATPATH /v/data/zhaop3/nmr

F2 - Acquisition Parameters  
 Date\_ 20171115  
 Time 9.52  
 INSTRUM av600  
 PROBHD 5 mm CPBBO BB-  
 PULPROG zg30  
 TD 98074  
 SOLVENT CDCl3  
 NS 8  
 DS 2  
 SWH 9615.385 Hz  
 FIDRES 0.098042 Hz  
 AQ 5.0998478 sec  
 RG 10  
 DW 52.000 usec  
 DE 13.70 usec  
 TE 298.0 K  
 D1 0.10000000 sec  
 TD0 1

===== CHANNEL f1 =====  
 SF01 600.1342009 MHz  
 NUC1 1H  
 P1 12.00 usec  
 PLW1 20.00000000 W

F2 - Processing parameters  
 SI 65536  
 SF 600.1300301 MHz  
 WDW EM  
 SSB 0  
 LB 0.30 Hz  
 GB 0  
 FC 1.00



**<sup>13</sup>C spectrum with <sup>1</sup>H decoupling**

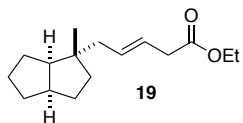

<sup>13</sup>C NMR (CDCl<sub>3</sub>, 151 MHz)

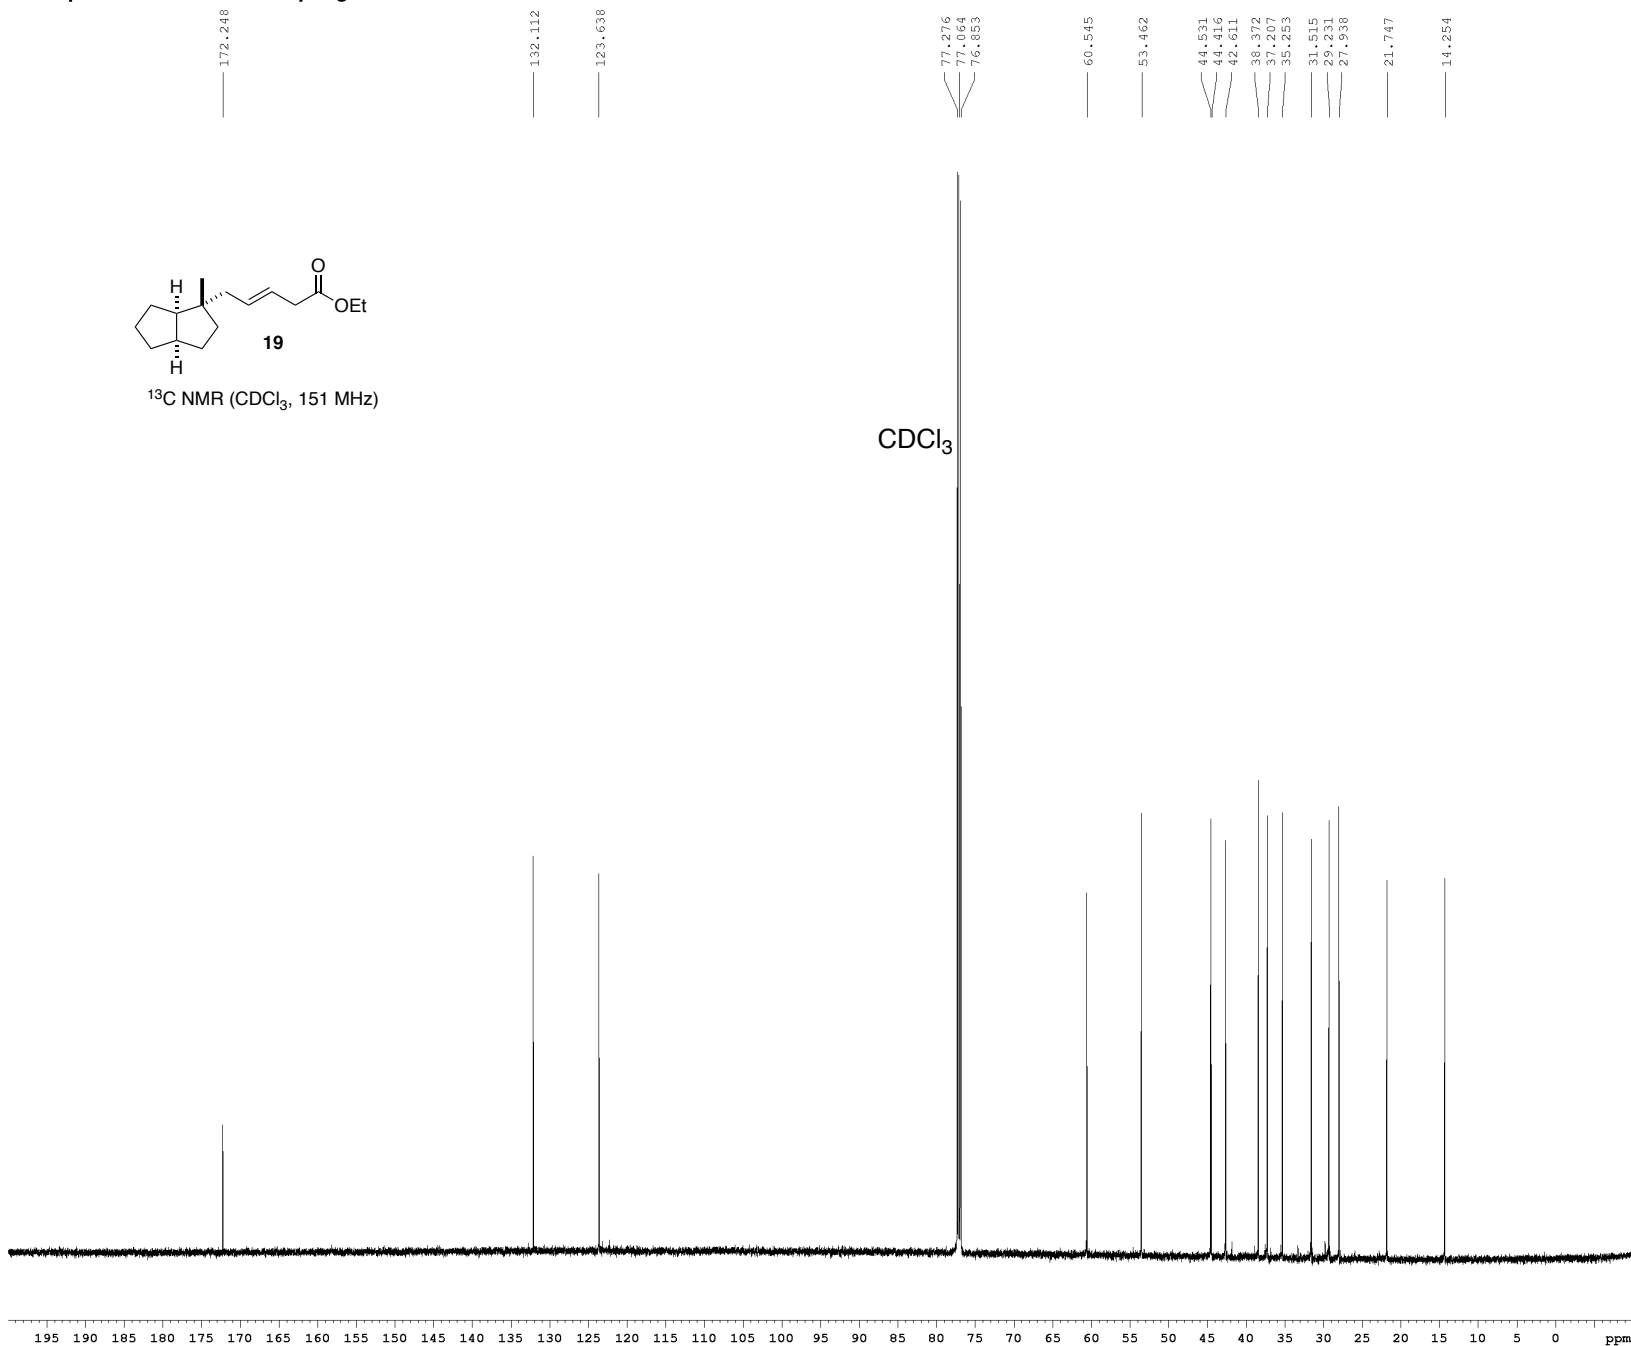

```

Current Data Parameters
NAME      F2-4044-C
EXPNO     2
PROCNO    1
DATPATH   /v/data/zhaop3/nmr

F2 - Acquisition Parameters
Date_     20171118
Time      9.38
INSTRUM   av600
PROBHD    5 mm CPBBO BB-
PULPROG   zgpg30
TD         65536
SOLVENT   CDCl3
NS         117
DS         4
SWH        36231.883 Hz
FIDRES     0.552855 Hz
AQ         0.9043968 sec
RG         2050
DW         13.800 usec
DE         19.65 usec
TE         298.0 K
D1         0.40000001 sec
D11        0.03000000 sec
TDO        1

===== CHANNEL f1 =====
SFO1      150.9194080 MHz
NUC1       13C
P1         10.00 usec
PLW1      64.00000000 W

===== CHANNEL f2 =====
SFO2      600.1330910 MHz
NUC2       1H
CPDPRG2    waltz16
PCPD2      80.00 usec
PLW2      20.00000000 W
PLW12     0.36000001 W

F2 - Processing parameters
SI         65536
SF         150.9028085 MHz
WDW        EM
SSB         0
LB         1.00 Hz
GB         0
PC         1.00
    
```

<sup>1</sup>H spectrum

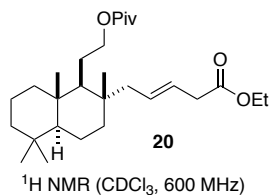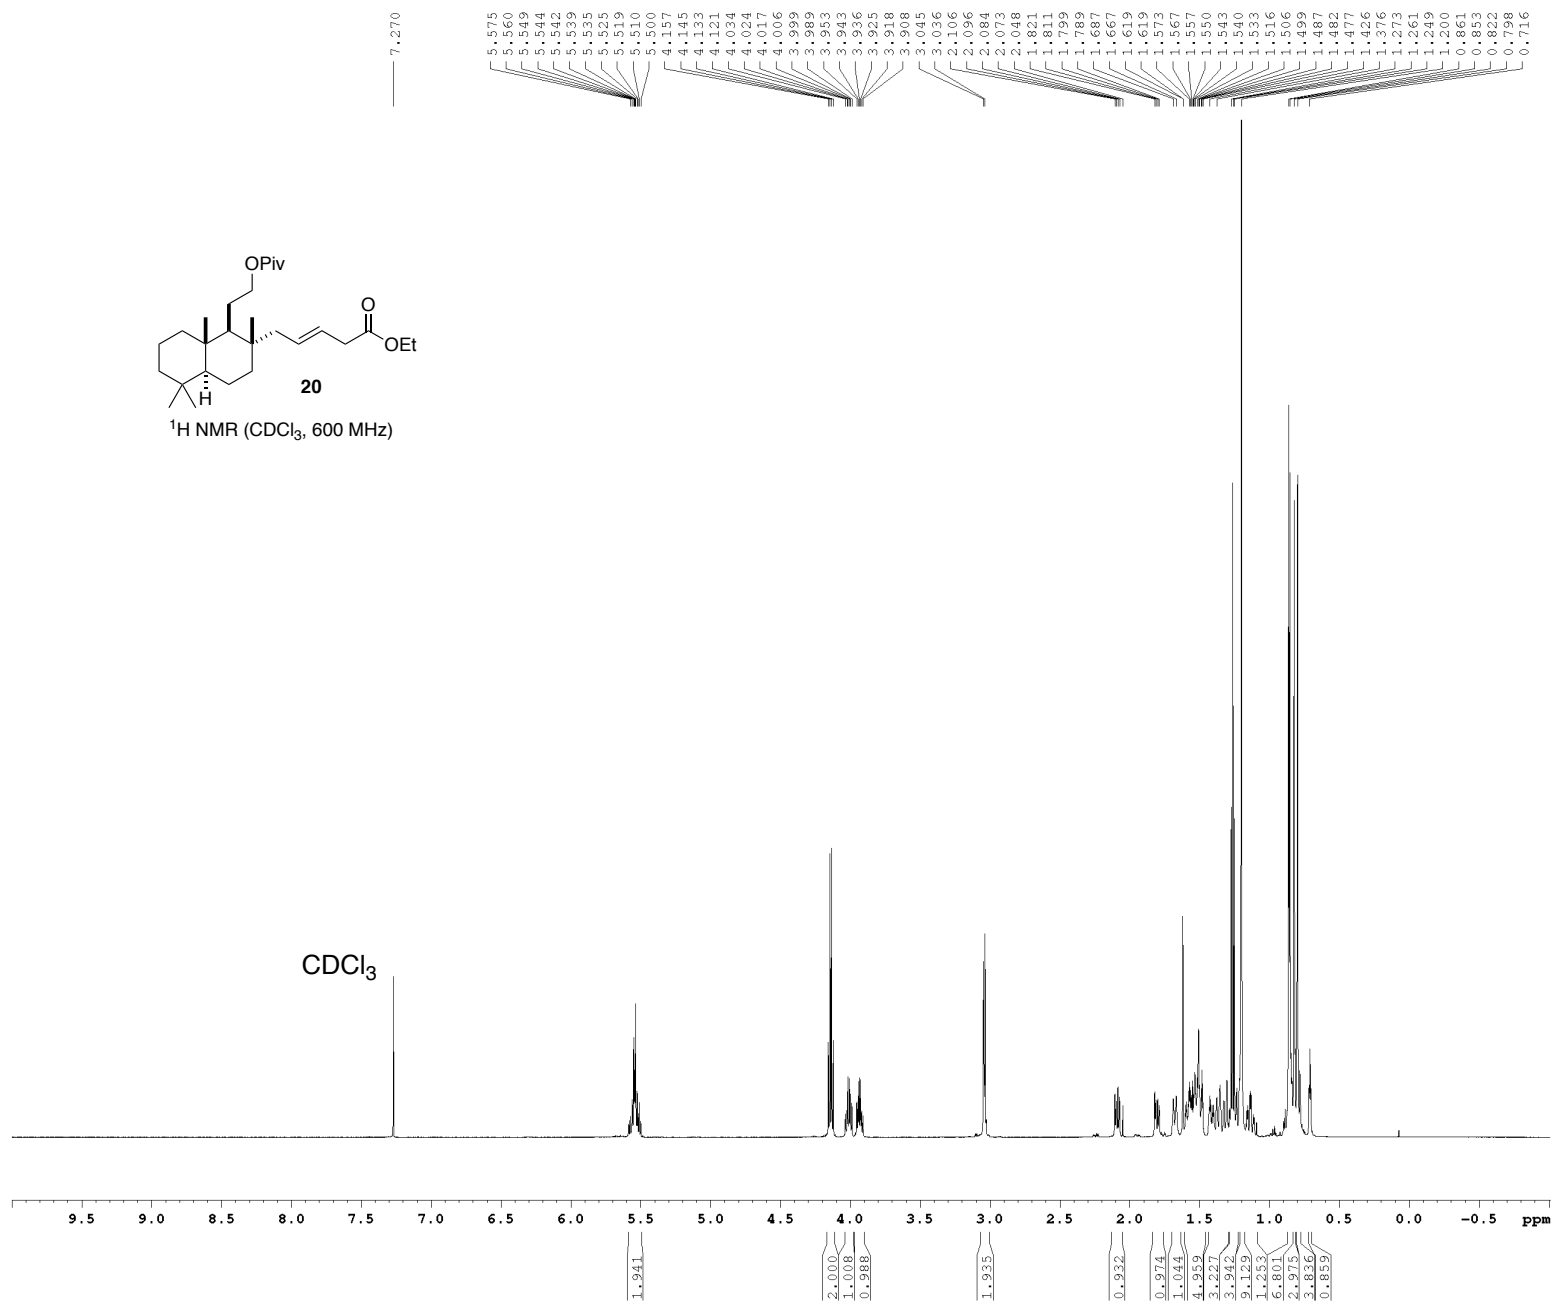

Current Data Parameters  
 NAME PZ-4044-B  
 EXPNO 1  
 PROCNO 1  
 DATPATH /v/data/zhaop3/nmr

F2 - Acquisition Parameters  
 Date\_ 20171115  
 Time 9.48  
 INSTRUM av600  
 PROBHD 5 mm CPBBO BB-  
 PULPROG zg30  
 TD 98074  
 SOLVENT CDCl3  
 NS 8  
 DS 2  
 SWH 9615.385 Hz  
 FIDRES 0.098042 Hz  
 AQ 5.0998478 sec  
 RG 10  
 DW 52.000 usec  
 DE 13.70 usec  
 TE 298.0 K  
 D1 0.10000000 sec  
 TDO 1

===== CHANNEL f1 =====  
 SFO1 600.1342009 MHz  
 NUC1 1H  
 P1 12.00 usec  
 PLW1 20.00000000 W

F2 - Processing parameters  
 SI 65536  
 SF 600.1300300 MHz  
 WDW EM  
 SSB 0  
 LB 0.30 Hz  
 GB 0  
 PC 1.00

# **<sup>13</sup>C spectrum with <sup>1</sup>H decoupling**

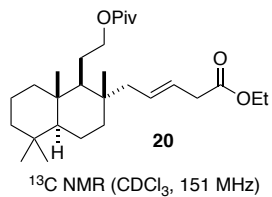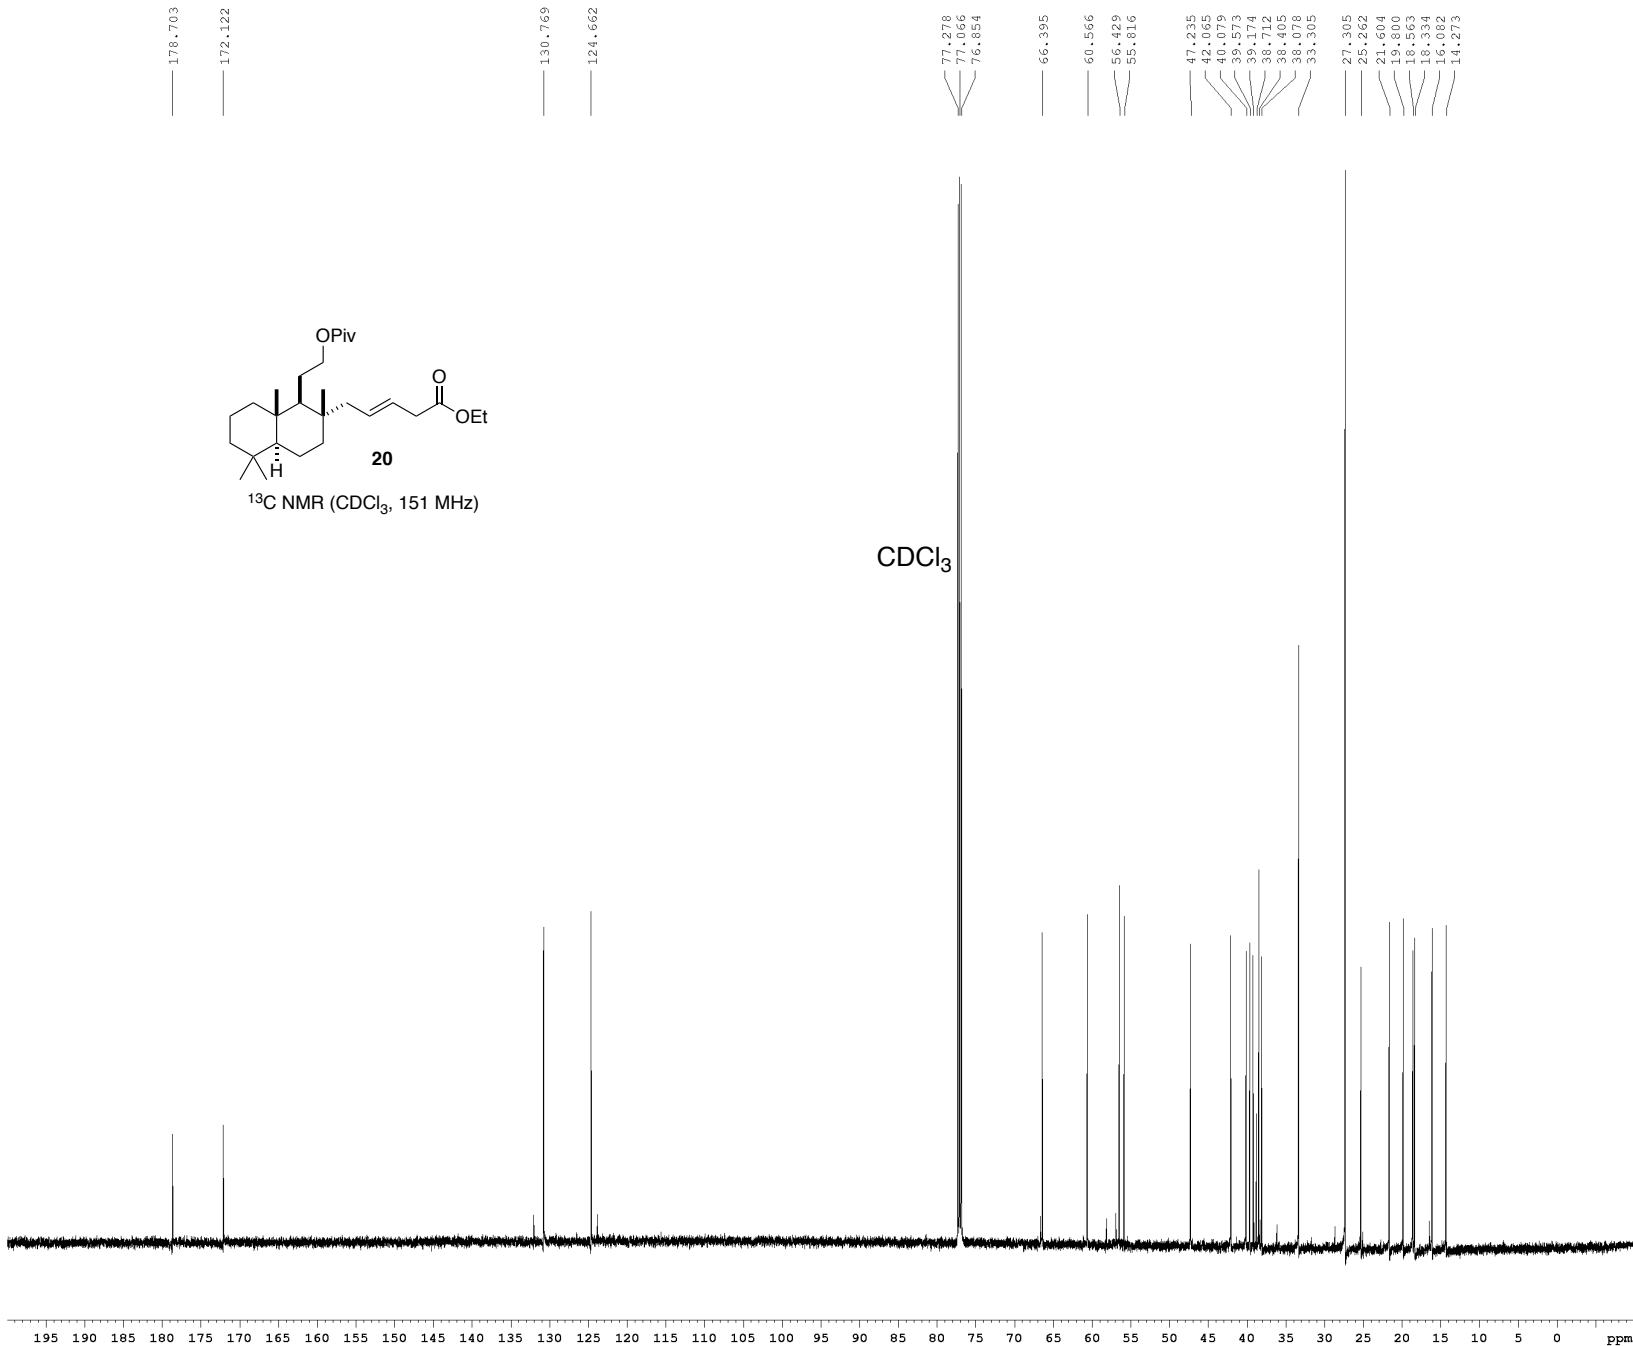

```

Current Data Parameters
NAME      P2-4044-B
EXPNO     2
PROCNO    1
DATPATH   /v/data/zhaop3/nmr

F2 - Acquisition Parameters
Date_     20171117
Time      9.25
INSTRUM   ag600
PROBHD     5 mm CPBBO BB-
PULPROG    zgpg30
TD         65536
SOLVENT    cdcl3
NS          52
DS          4
SWH         36231.883 Hz
FIDRES      0.552855 Hz
AQ          0.9043968 sec
RG          2050
DW          13.800 usec
DE          19.65 usec
TE          298.0 K
D1          0.40000001 sec
D11         0.03000000 sec
TD0         1

===== CHANNEL f1 =====
SFO1       150.9194080 MHz
NUC1        13C
P1         10.00 usec
PLW1       64.00000000 W

===== CHANNEL f2 =====
SFO2       600.1330010 MHz
NUC2         1H
CPDPRG2     waltz16
PCPD2       80.00 usec
PLW2       20.00000000 W
PLW12      0.36000001 W

F2 - Processing parameters
SI          65536
SF         150.9028085 MHz
WDW         EM
SSB         0
LB          1.00 Hz
GB          0
PC          1.00
  
```

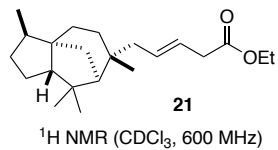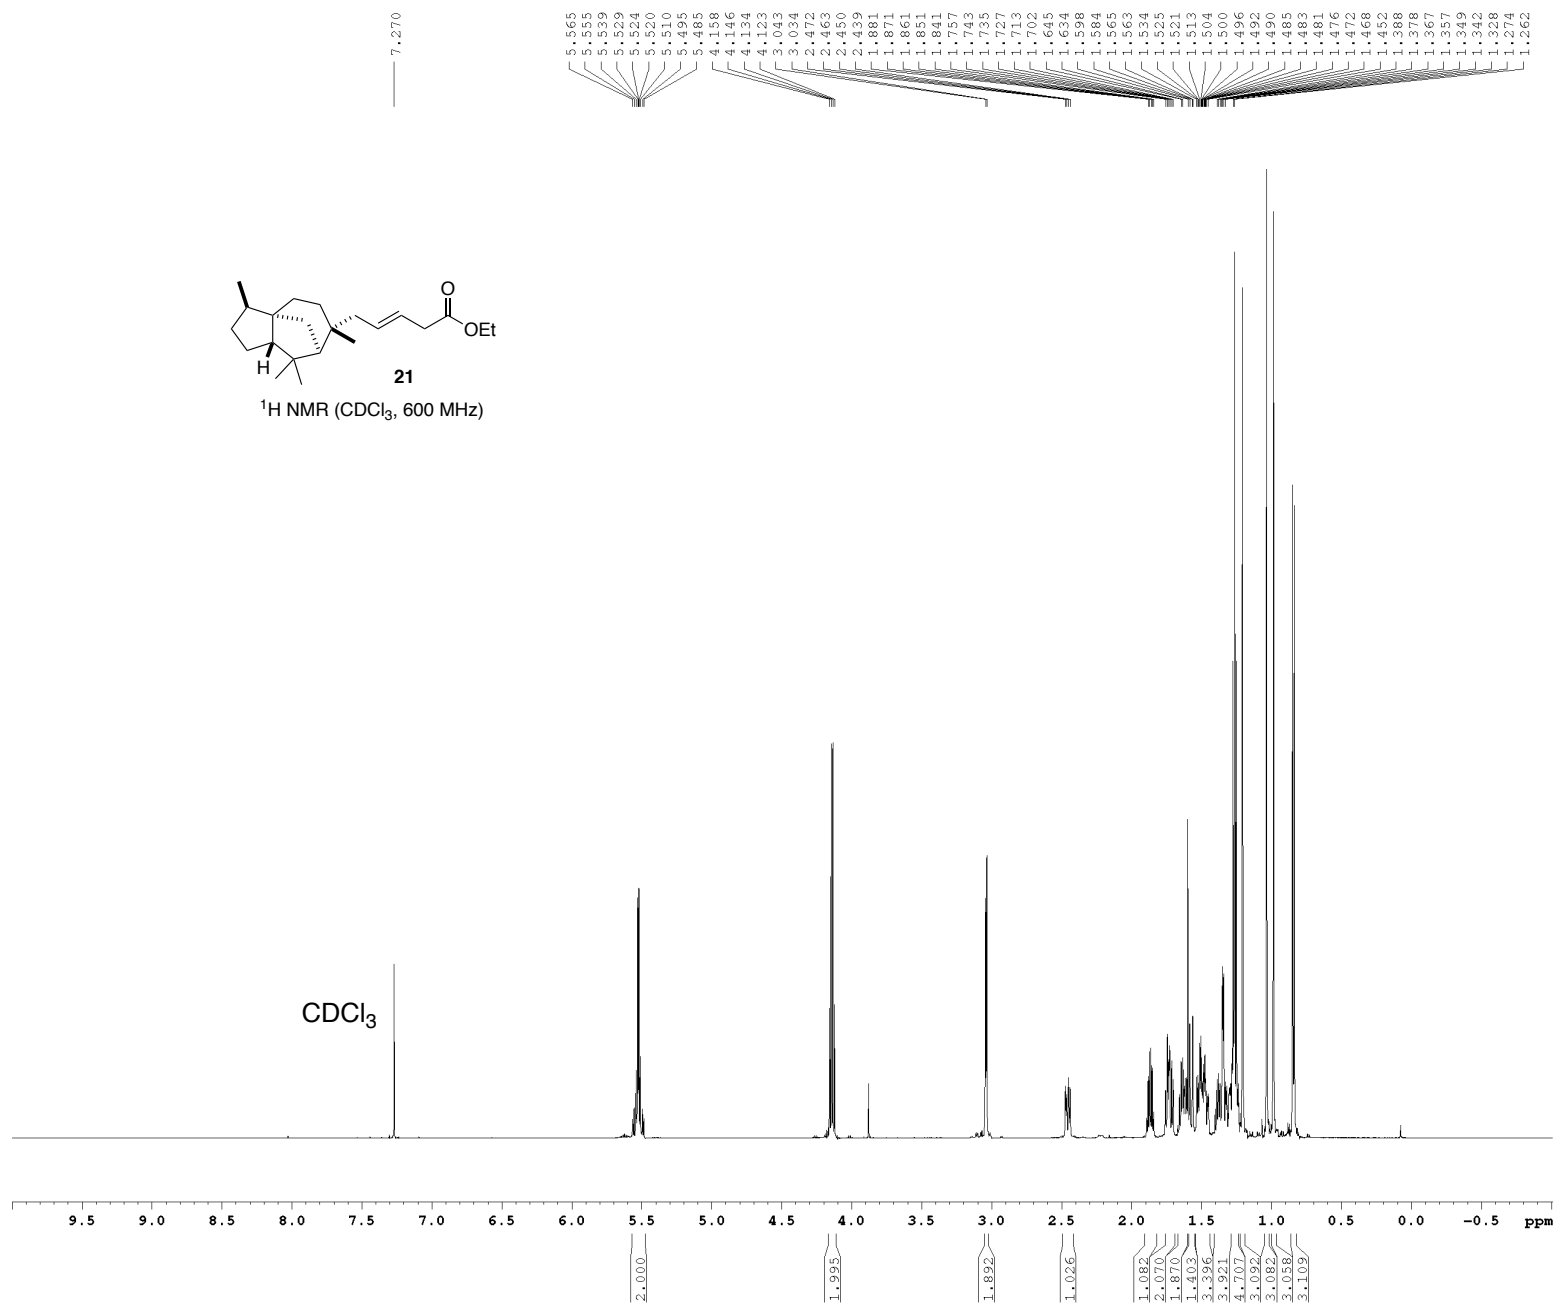

Current Data Parameters  
 NAME PZ-4044-D  
 EXPNO 1  
 PROCNO 1  
 DATPATH /v/data/zhaop3/nmr  
  
 F2 - Acquisition Parameters  
 Date\_ 20171115  
 Time 9.57  
 INSTRUM av600  
 PROBHD 5 mm CPBBO BB-  
 PULPROG zg30  
 TD 98074  
 SOLVENT CDCl3  
 NS 8  
 DS 2  
 SWH 9615.385 Hz  
 FIDRES 0.098042 Hz  
 AQ 5.0998478 sec  
 RG 10  
 DW 52.000 usec  
 DE 13.70 usec  
 TE 298.0 K  
 D1 0.10000000 sec  
 TD0 1  
  
 ===== CHANNEL f1 =====  
 SF01 600.1342009 MHz  
 NUC1 1H  
 P1 12.00 usec  
 PLW1 20.00000000 W  
  
 F2 - Processing parameters  
 SI 65536  
 SF 600.1300302 MHz  
 WDW EM  
 SSB 0  
 LB 0.30 Hz  
 GB 0  
 FC 1.00

**<sup>13</sup>C spectrum with <sup>1</sup>H decoupling**

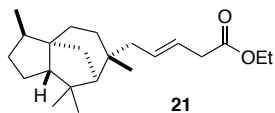

<sup>13</sup>C NMR (CDCl<sub>3</sub>, 151 MHz)

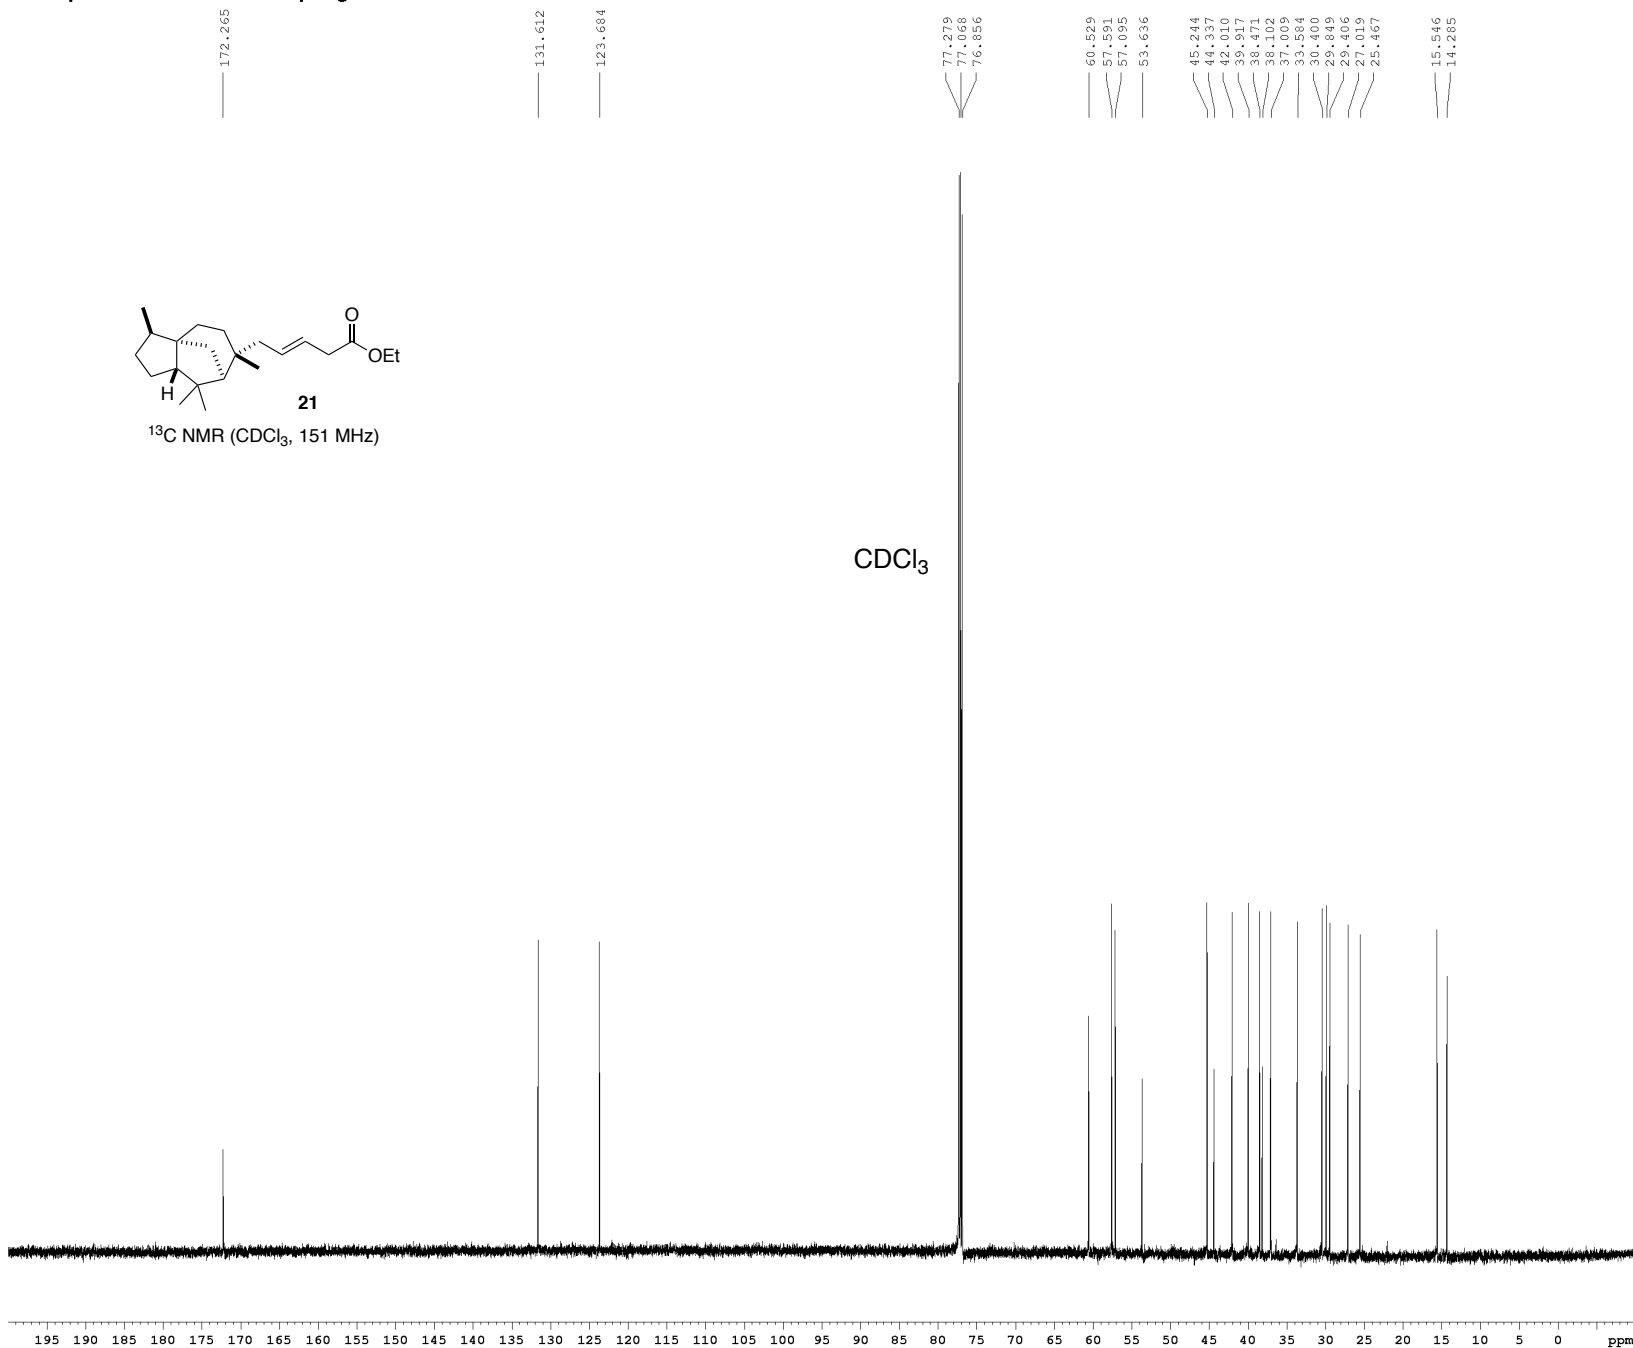

```

Current Data Parameters
NAME      PZ-4044-D
EXPNO     2
PROCNO    1
DATPATH   /v/data/zhaop3/nmr

F2 - Acquisition Parameters
Date_     20171120
Time      11.24
INSTRUM    av600
PROBHD     5 mm CFBBO BB-
PULPROG    zgpg30
TD         65536
SOLVENT    CDCl3
NS          33
DS          4
SWH         36231.883 Hz
FIDRES      0.552855 Hz
AQ          0.9043968 sec
RG          2050
DW          13.800 usec
DE          19.65 usec
TE          298.0 K
D1          0.40000001 sec
D11         0.03000000 sec
TD0         1

===== CHANNEL f1 =====
SFO1       150.9194080 MHz
NUC1        13C
P1         10.00 usec
PLW1       64.00000000 W

===== CHANNEL f2 =====
SFO2       600.1330010 MHz
NUC2        1H
CPDPRG2    waltz16
PCPD2      80.00 usec
PLW2       20.00000000 W
PLW12      0.36000001 W

F2 - Processing parameters
SI         65536
SF         150.9028085 MHz
WDW        EM
SSB         0
LB          1.00 Hz
GB          0
PC          1.00
    
```

<sup>1</sup>H spectrum

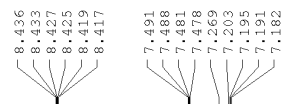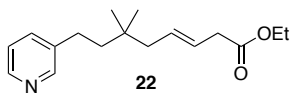

<sup>1</sup>H NMR (CDCl<sub>3</sub>, 600 MHz)

Current Data Parameters  
NAME P2-4044-E  
EXPNO 1  
PROCNO 1  
DATPATH /v/data/zhaop3/nmr

F2 - Acquisition Parameters  
Date\_ 20171116  
Time 9.34  
INSTRUM av600  
PROBHD 5 mm CPBBO BB-  
PULPROG zg30  
TD 98074  
SOLVENT CDCl3  
NS 8  
DS 2  
SWH 9615.385 Hz  
FIDRES 0.098042 Hz  
AQ 5.0998478 sec  
RG 20.2  
DW 52.000 usec  
DE 13.70 usec  
TE 298.0 K  
D1 0.10000000 sec  
TD0 1

===== CHANNEL f1 =====  
SF01 600.1342009 MHz  
NUC1 1H  
P1 12.00 usec  
PLW1 20.00000000 W

F2 - Processing parameters  
SI 65536  
SF 600.1300308 MHz  
WDW EM  
SSB 0  
LB 0.30 Hz  
GB 0  
PC 1.00

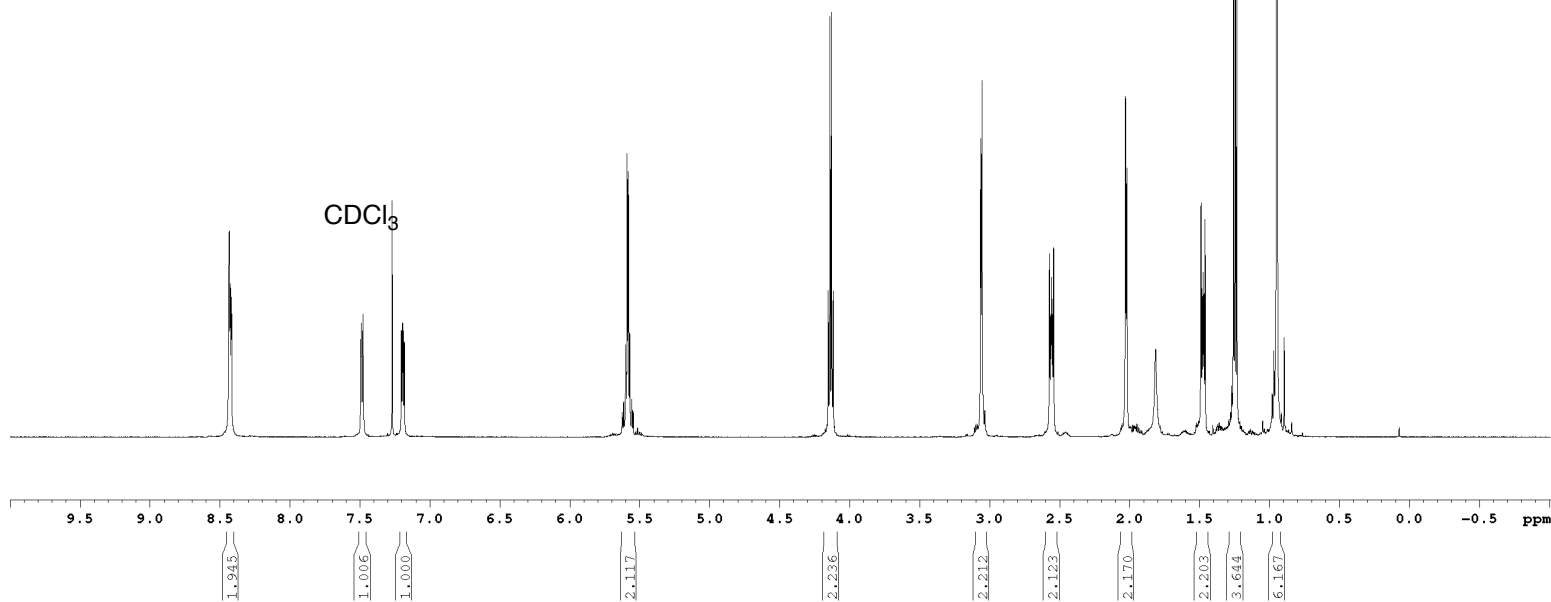

# **<sup>13</sup>C spectrum with <sup>1</sup>H decoupling**

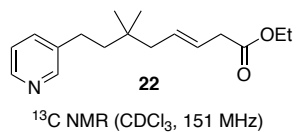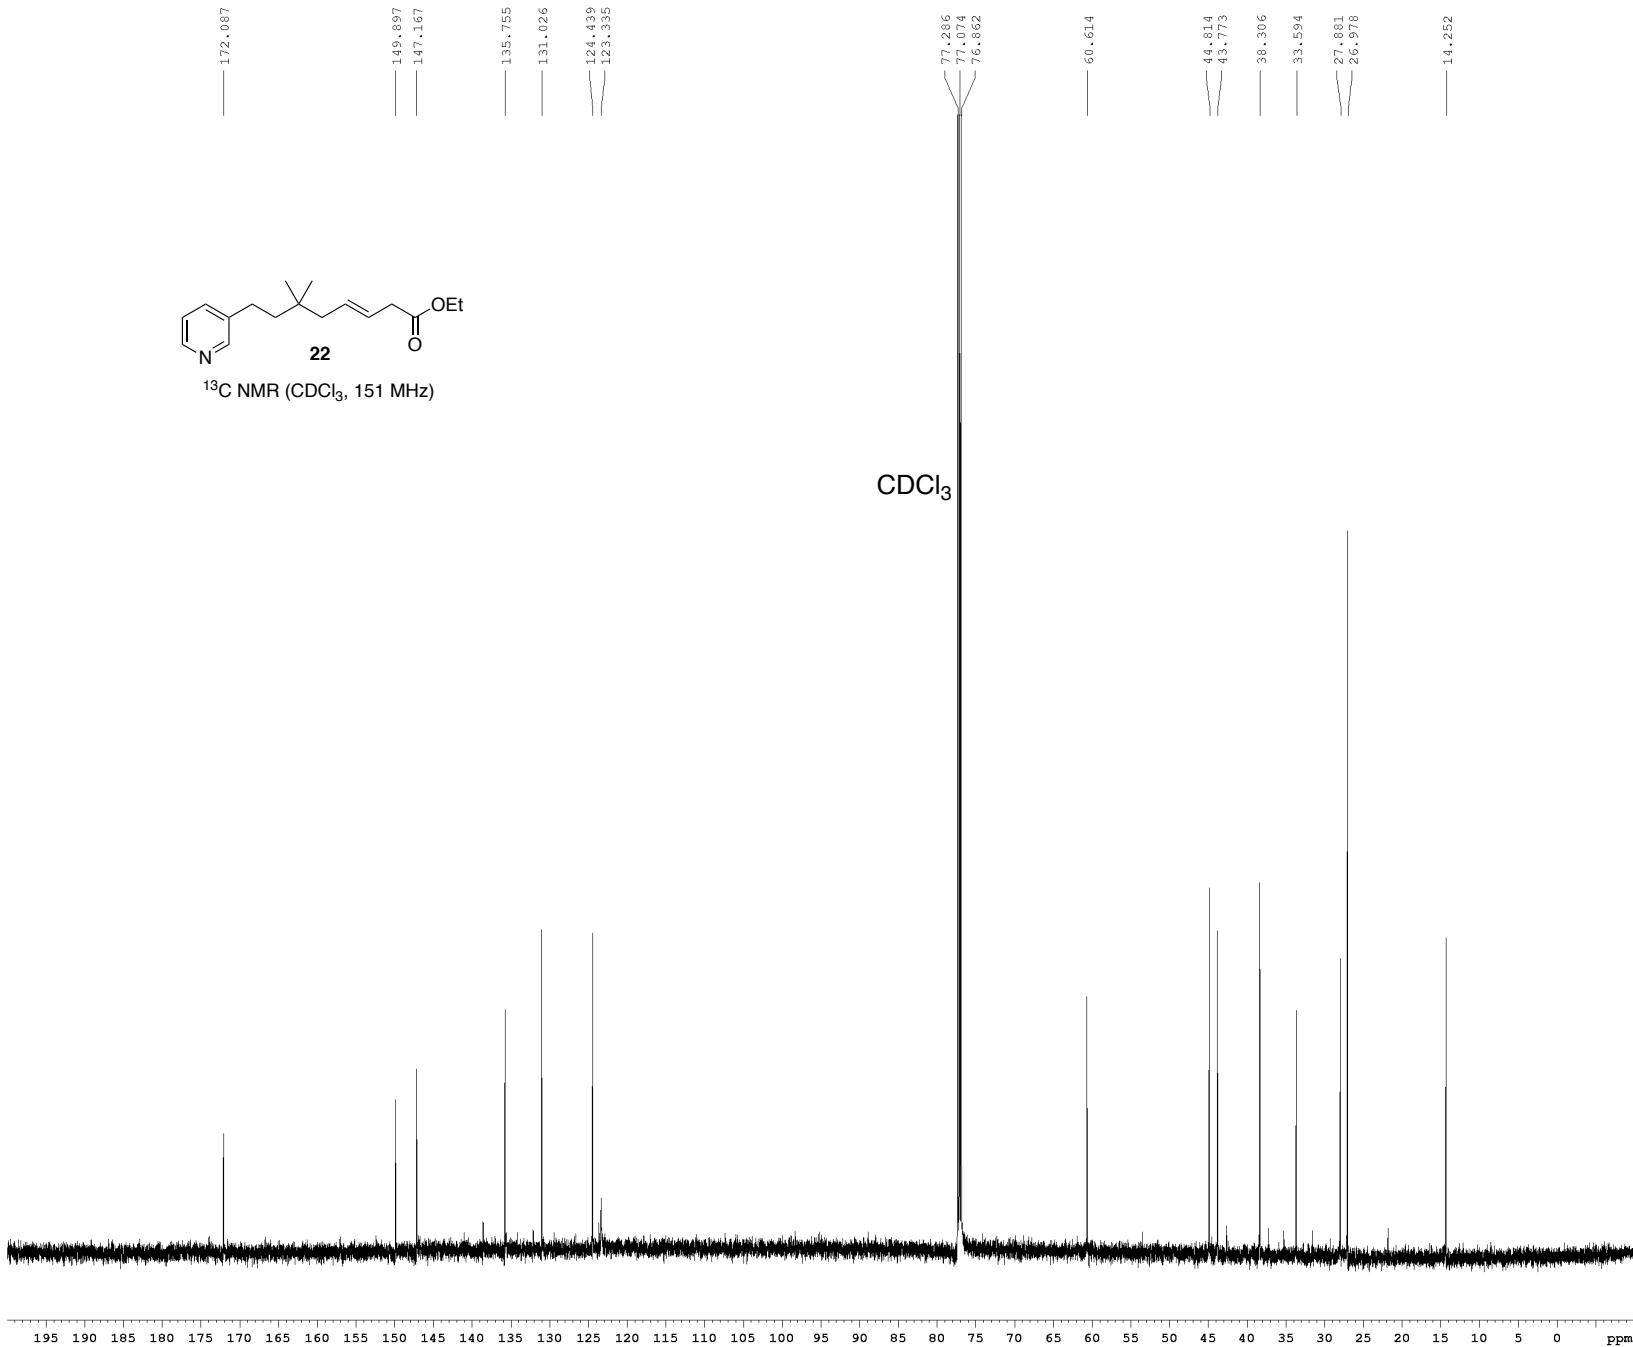

```

Current Data Parameters
NAME      P2-4044-E
EXPNO     5
PROCNO    1
DATPATH   /v/data/zhaop3/nmr

F2 - Acquisition Parameters
Date_     20171120
Time      11.16
INSTRUM   av600
PROBHD    5 mm CPBBO BB-
PULPROG   zgpg30
TD         65536
SOLVENT   CDCl3
NS         31
DS         4
SWH        36231.883 Hz
FIDRES     0.552855 Hz
AQ         0.9043968 sec
RG         2050
DW         13.800 usec
DE         19.65 usec
TE         298.0 K
D1         0.40000001 sec
D11        0.03000000 sec
TD0        1

===== CHANNEL f1 =====
SFO1      150.9194080 MHz
NUC1       13C
P1        10.00 usec
PLW1      64.00000000 W

===== CHANNEL f2 =====
SFO2      600.1330010 MHz
NUC2       1H
CPDPRG2   waltz16
PCPD2     80.00 usec
PLW2      20.00000000 W
PLW12     0.36000001 W

F2 - Processing parameters
SI         65536
SF         150.9028085 MHz
WDW        EM
SSB        0
LB         1.00 Hz
GB         0
PC         1.00
  
```

<sup>1</sup>H spectrum

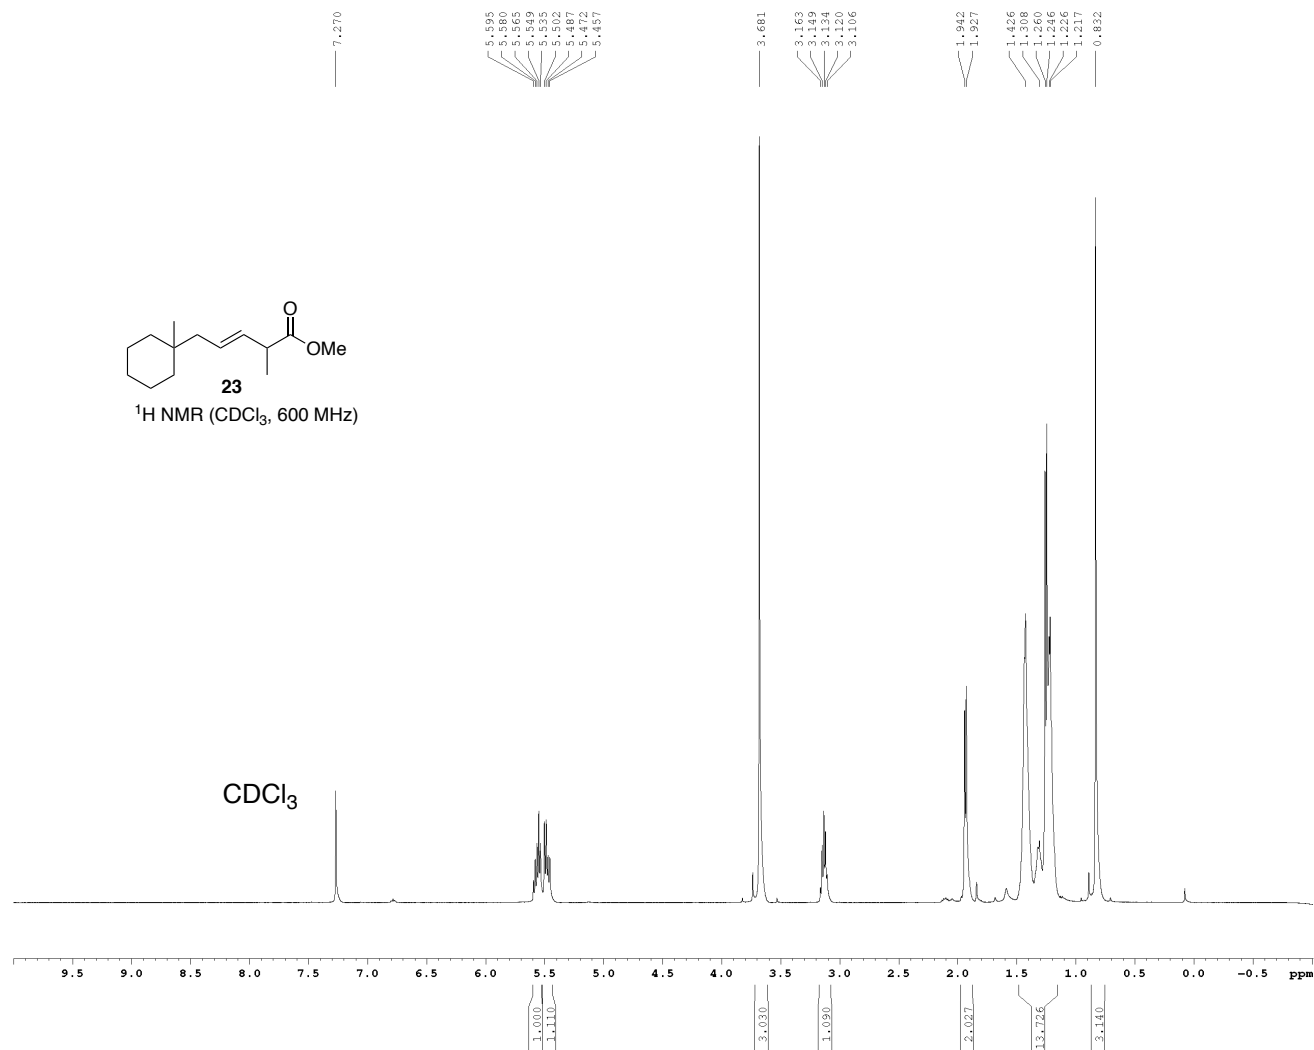

Current Data Parameters  
NAME P2-2083-P  
EXPNO 1  
PROCNO 1  
DATE\_ /v/data/zhaop3/nmr  
F2 - Acquisition Parameters  
Date\_ 20170223  
Time 10.04  
INSTRUM cryo500  
PROBHD 5 mm CPTCI 1H-  
PULPROG zg30  
TD 81728  
SOLVENT CDCl3  
NS 8  
DS 2  
SWH 8012.820 Hz  
FIDRES 0.098043 Hz  
AQ 5.0998273 sec  
RG 7.1  
DW 62.400 usec  
DE 6.00 usec  
TE 296.0 K  
D1 0.10000000 sec  
MCREST 0 sec  
MCWEE 0.01500000 sec  
----- CHANNEL f1 -----  
NUC1 1H  
P1 7.50 usec  
PL1 1.50 dB  
SFO1 500.2235015 MHz  
F2 - Processing parameters  
SI 65536  
SF 500.2200270 MHz  
WDW EM  
SSB 0  
LB 0.30 Hz  
GB 0  
PC 1.00



# **<sup>13</sup>C spectrum with <sup>1</sup>H decoupling**

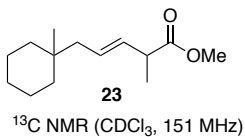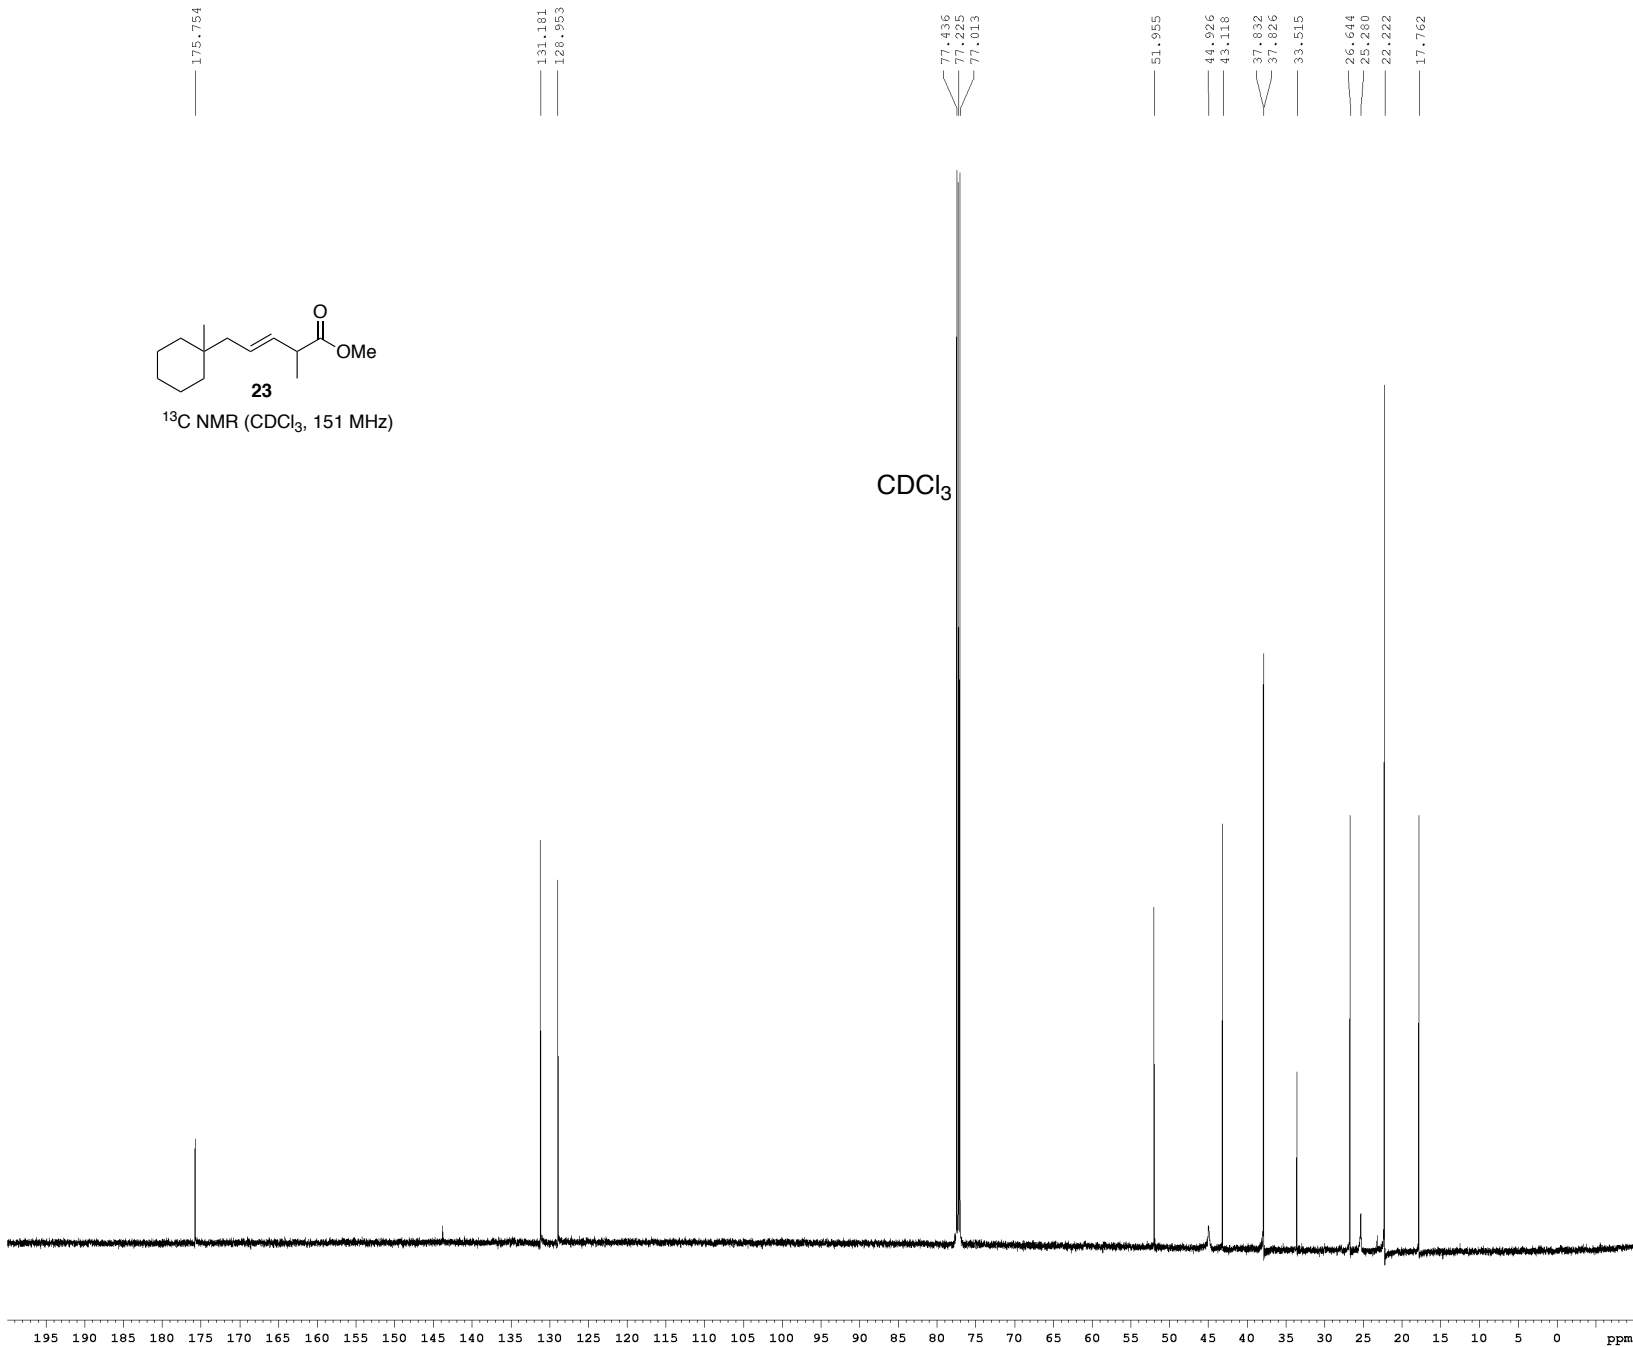

```

Current Data Parameters
NAME      P2-2083-P
EXPNO     5
PROCNO    1
DATPATH   /v/data/zhaop3/nmr

F2 - Acquisition Parameters
Date_     20170225
Time      23.14
INSTRUM   av600
PROBHD    5 mm CPBBO BB-
PULPROG   zgpg30
TD         65536
SOLVENT    CDCl3
NS         126
DS         4
SWH        36231.883 Hz
FIDRES     0.552855 Hz
AQ         0.9043968 sec
RG         2050
DW         13.800 usec
DE         19.65 usec
TE         298.0 K
D1         0.40000001 sec
D11        0.03000000 sec
TD0        1

===== CHANNEL f1 =====
SFO1      150.9194080 MHz
NUC1       13C
P1        10.00 usec
PLW1      64.00000000 W

===== CHANNEL f2 =====
SFO2      600.1330010 MHz
NUC2       1H
CPDPRG2   waltz16
PCPD2     80.00 usec
PLW2      20.00000000 W
PLW12     0.36000001 W

F2 - Processing parameters
SI         65536
SF         150.9027833 MHz
WDW        EM
SSB        0
LB         1.00 Hz
GB         0
PC         1.00
  
```

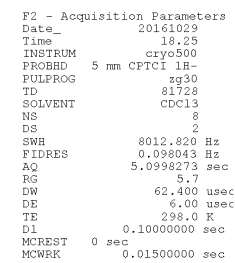

```
===== CHANNEL f1 =====
NUC1                1H
P1                  7.50 usec
PL1                 1.60 dB
SFO1               500.2235015 MHz
```

```
F2 - Processing parameters
SI                      65536
SF                      500.2200266 MHz
WDW                      EM
SSB                      0
LB                      0.30 Hz
GB                      0
PC                      4.00
```

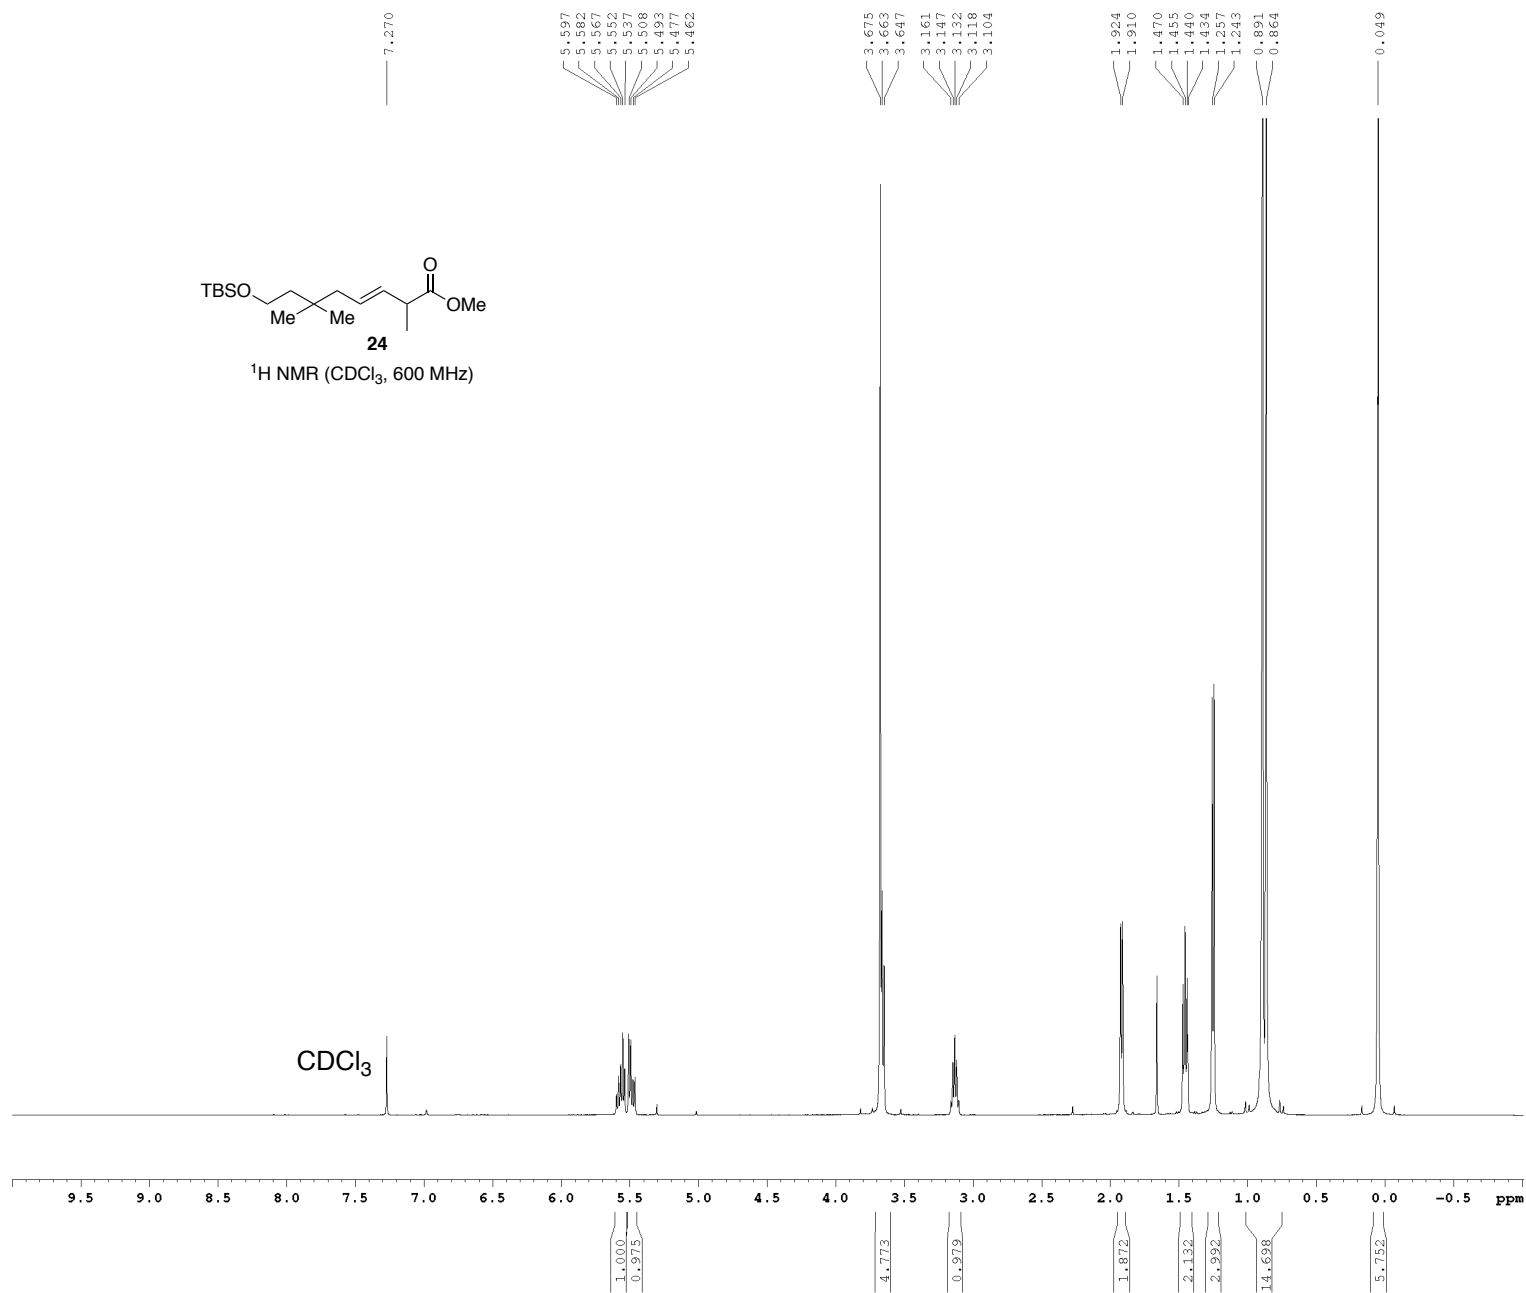

|       |         |
|-------|---------|
| _____ | 175.664 |
| _____ | 131.491 |
| _____ | 129.036 |

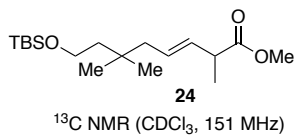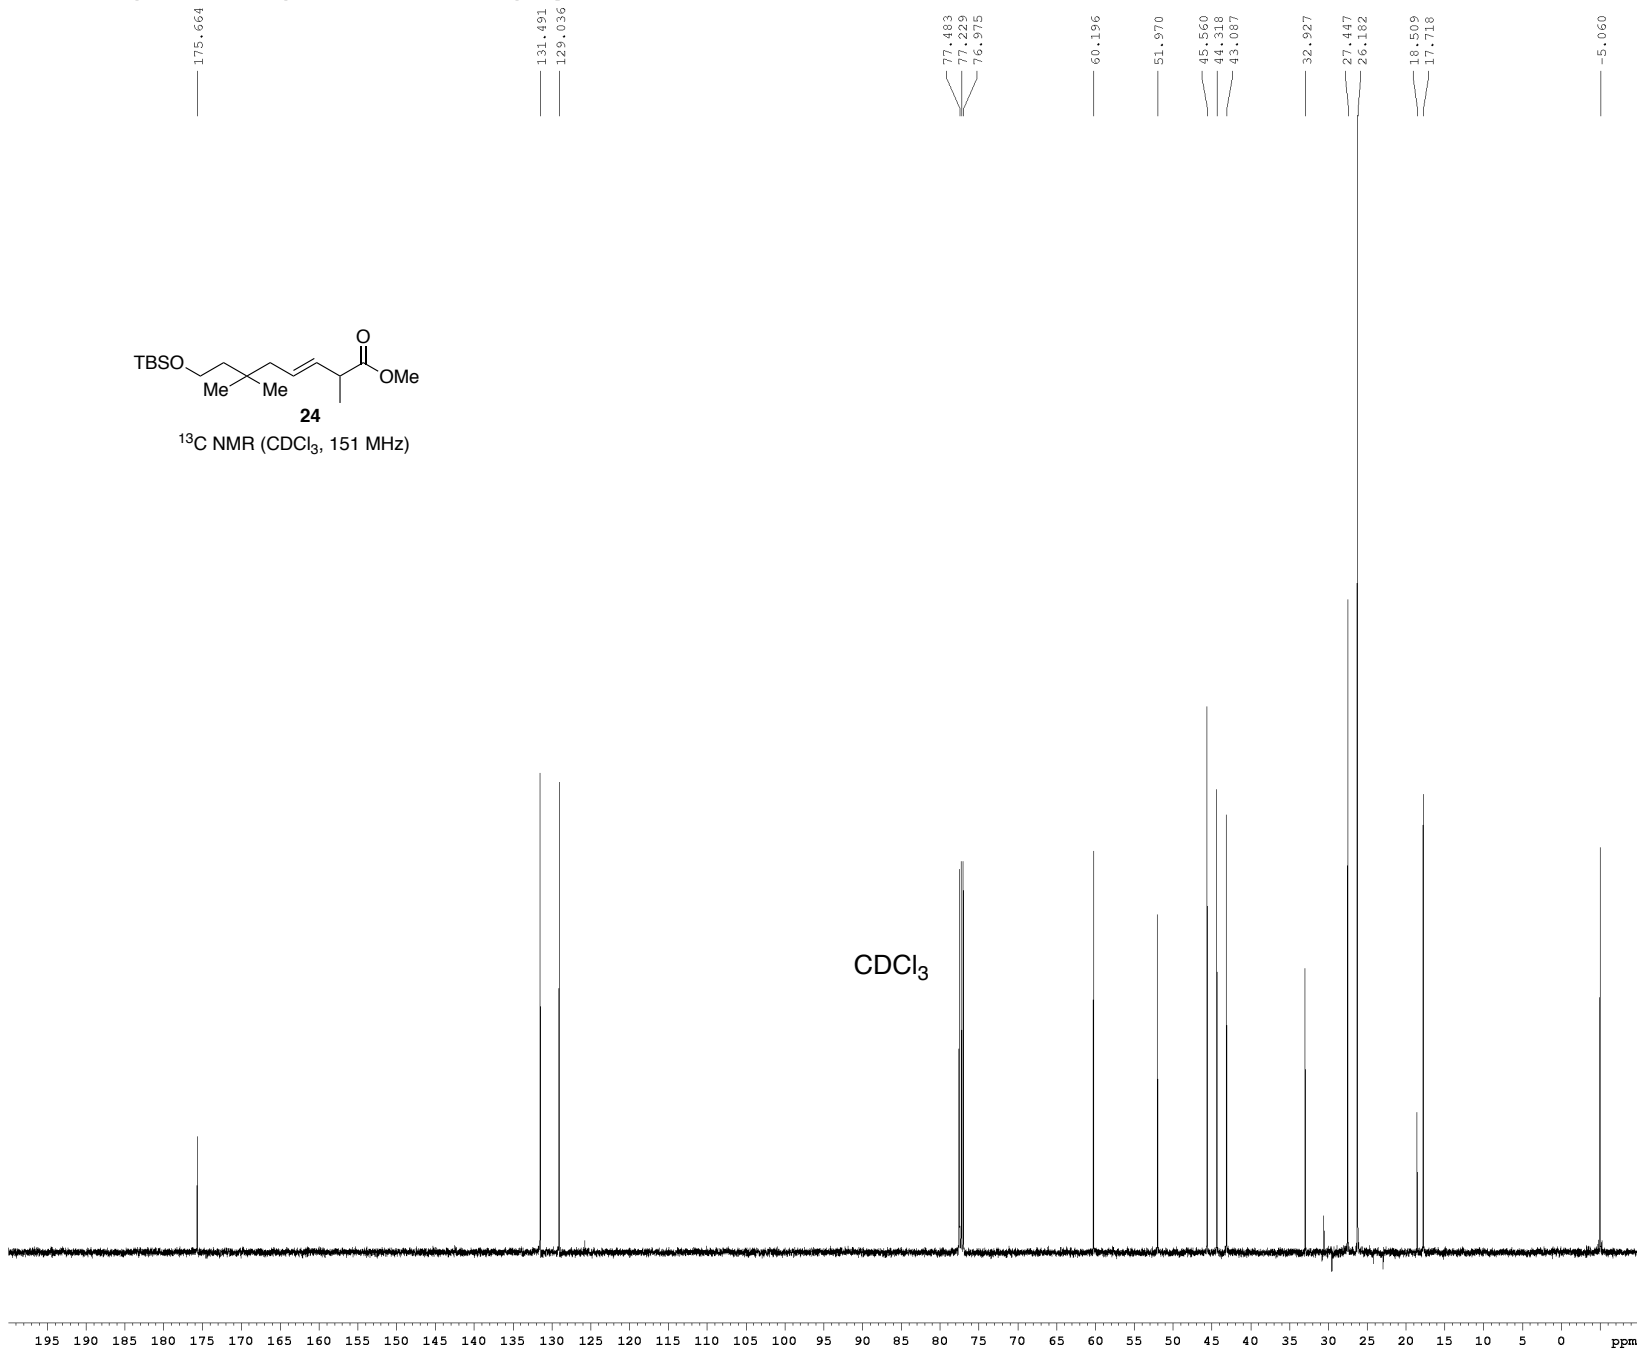

```

Current Data Parameters
NAME          SL165-13C
EXPNO         1
PROCNO        1
PROCNAME      /v/data/zhaop3/1mr

F2 - Acquisition Parameters
Date_         20161029
Time          18.33
INSTRUM       cryso50
PROBHD        5 mm CP1H1-13
PULPROG       SpinEcho3p30pgp.prd
TD            65536
SOLVENT       CDCl3
NS            256
DS            15
FIDRES        30303.031 Hz
AQ            4.062388 Hz
RG            2896.3
DE            16.500 usec
TE            298.0 K
d1            0.25000000 sec
d11           0.03000000 sec
d17           0.00200000 sec
d16           0.00013600 sec
MCRSTRT       0 sec
MCKWRK        0.01500000 sec
F2            33.10 usec

===== CHANNEL f1 =====
NUC1           13C
P1            16.55 usec
P11           500.00 usec
P12           2000.00 usec
PL1           120.00 dB
PL11          1.00 dB
SFO1          125.7942548 MHz
SP1           2.70 dB
SP2           2.70 dB
SFNAM[1]      Crp60, 0.5, 2.0
SFNAM[2]      Crp60comp, 4
SFOFF1        0 Hz
SFOFF2        0 Hz

===== CHANNEL f2 =====
CPDPRG[F2]   waltz16
NUC2           1H
P2            100.00 usec
PL2           1.60 dB
PL12          24.50 dB
SFO2          500.2225011 MHz

===== GRADIENT CHANNEL =====
GRNAM[1]      SINE, 100
GRNAM[2]      SINE, 100
GPX1          0 %
GPX2          0 %
GPY1          0 %
GPY2          0 %
GZ1           30.00 %
GZ2           50.00 %
P15           500.00 usec
p16           1000.00 usec

F2 - Processing parameters
SI            65536
SF            125.7803993 MHz
WDW           EM
SSB           0
LB            1.00 Hz
GB            0
PC            2.00

```

<sup>1</sup>H spectrum

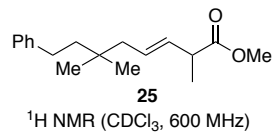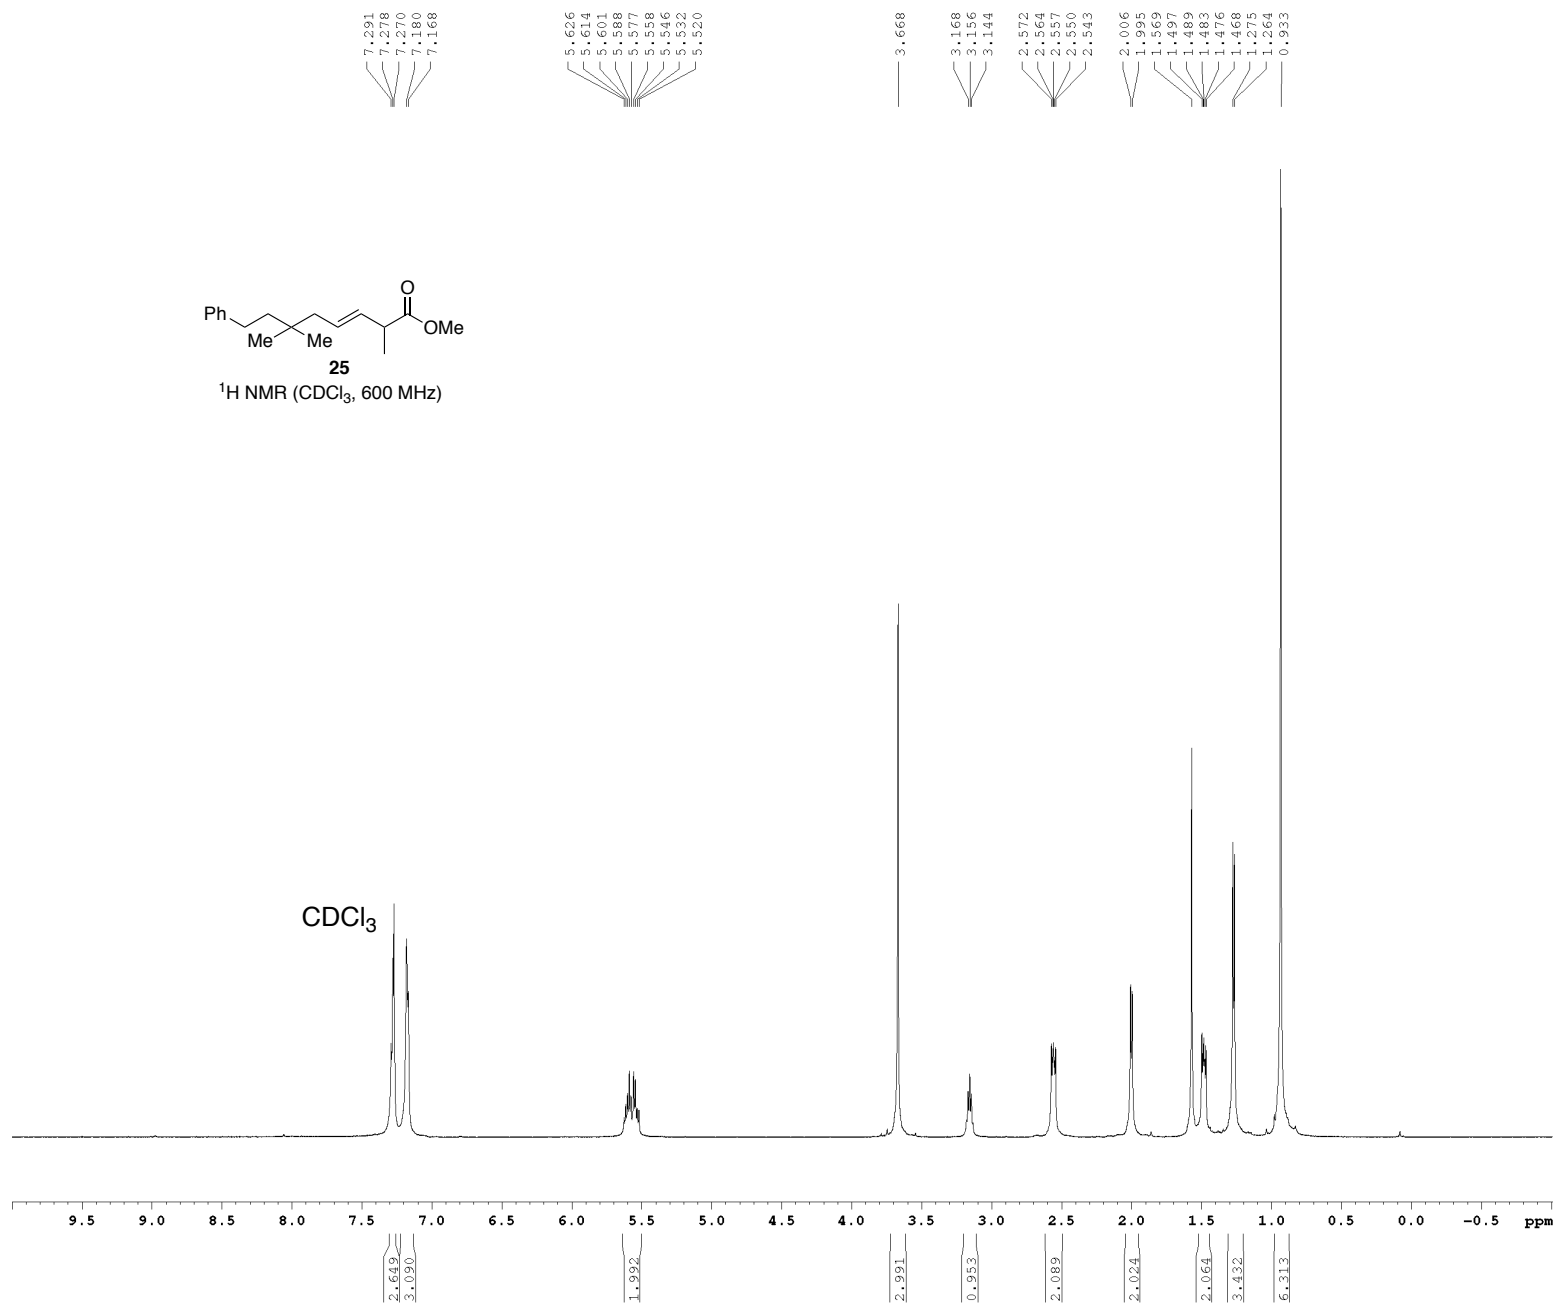

Current Data Parameters  
 NAME F2-4039-F1  
 EXPNO 1  
 PROCNO 1  
 DATPATH /v/data/zhaop3/nmr

F2 - Acquisition Parameters  
 Date\_ 20171113  
 Time 16.44  
 INSTRUM av600  
 PROBHD 5 mm CPBBO BB-  
 PULPROG zg30  
 TD 98074  
 SOLVENT CDCl3  
 NS 8  
 DS 2  
 SWH 9615.385 Hz  
 FIDRES 0.098042 Hz  
 AQ 5.0998478 sec  
 RG 10  
 DW 52.000 usec  
 DE 13.70 usec  
 TE 298.0 K  
 D1 0.10000000 sec  
 TD0 1

===== CHANNEL f1 =====  
 SF01 600.1342009 MHz  
 NUC1 1H  
 P1 12.00 usec  
 PLW1 20.00000000 W

F2 - Processing parameters  
 SI 65536  
 SF 600.1300311 MHz  
 WDW EM  
 SSB 0  
 LB 0.30 Hz  
 GB 0  
 PC 1.00

# **<sup>13</sup>C spectrum with <sup>1</sup>H decoupling**

Current Data Parameters  
NAME F2-4039-P1  
EXPNO 2  
PROCNO 1  
DATPATH /v/data/zhaop3/nmr

F2 - Acquisition Parameters  
Date\_ 20171113  
Time 16.48  
INSTRUM av600  
PROBHD 5 mm CPBBO BB-  
PULPROG zgpg30  
TD 65536  
SOLVENT CDCl3  
NS 324  
DS 4  
SWH 36231.883 Hz  
FIDRES 0.552855 Hz  
AQ 0.9043968 sec  
RG 2050  
DW 13.800 usec  
DE 19.65 usec  
TE 298.0 K  
D1 0.40000001 sec  
D11 0.03000000 sec  
TD0 1

===== CHANNEL f1 =====  
SFO1 150.9194080 MHz  
NUC1 13C  
P1 10.00 usec  
PLW1 64.00000000 W

===== CHANNEL f2 =====  
SFO2 600.1330010 MHz  
NUC2 1H  
CPDPRG2 waltz16  
PCPD2 80.00 usec  
PLW2 20.00000000 W  
PLW12 0.36000001 W

F2 - Processing parameters  
SI 65536  
SF 150.9028085 MHz  
WDW EM  
SSB 0  
LB 1.00 Hz  
GB 0  
PC 1.00

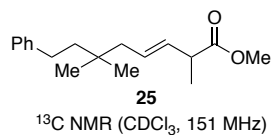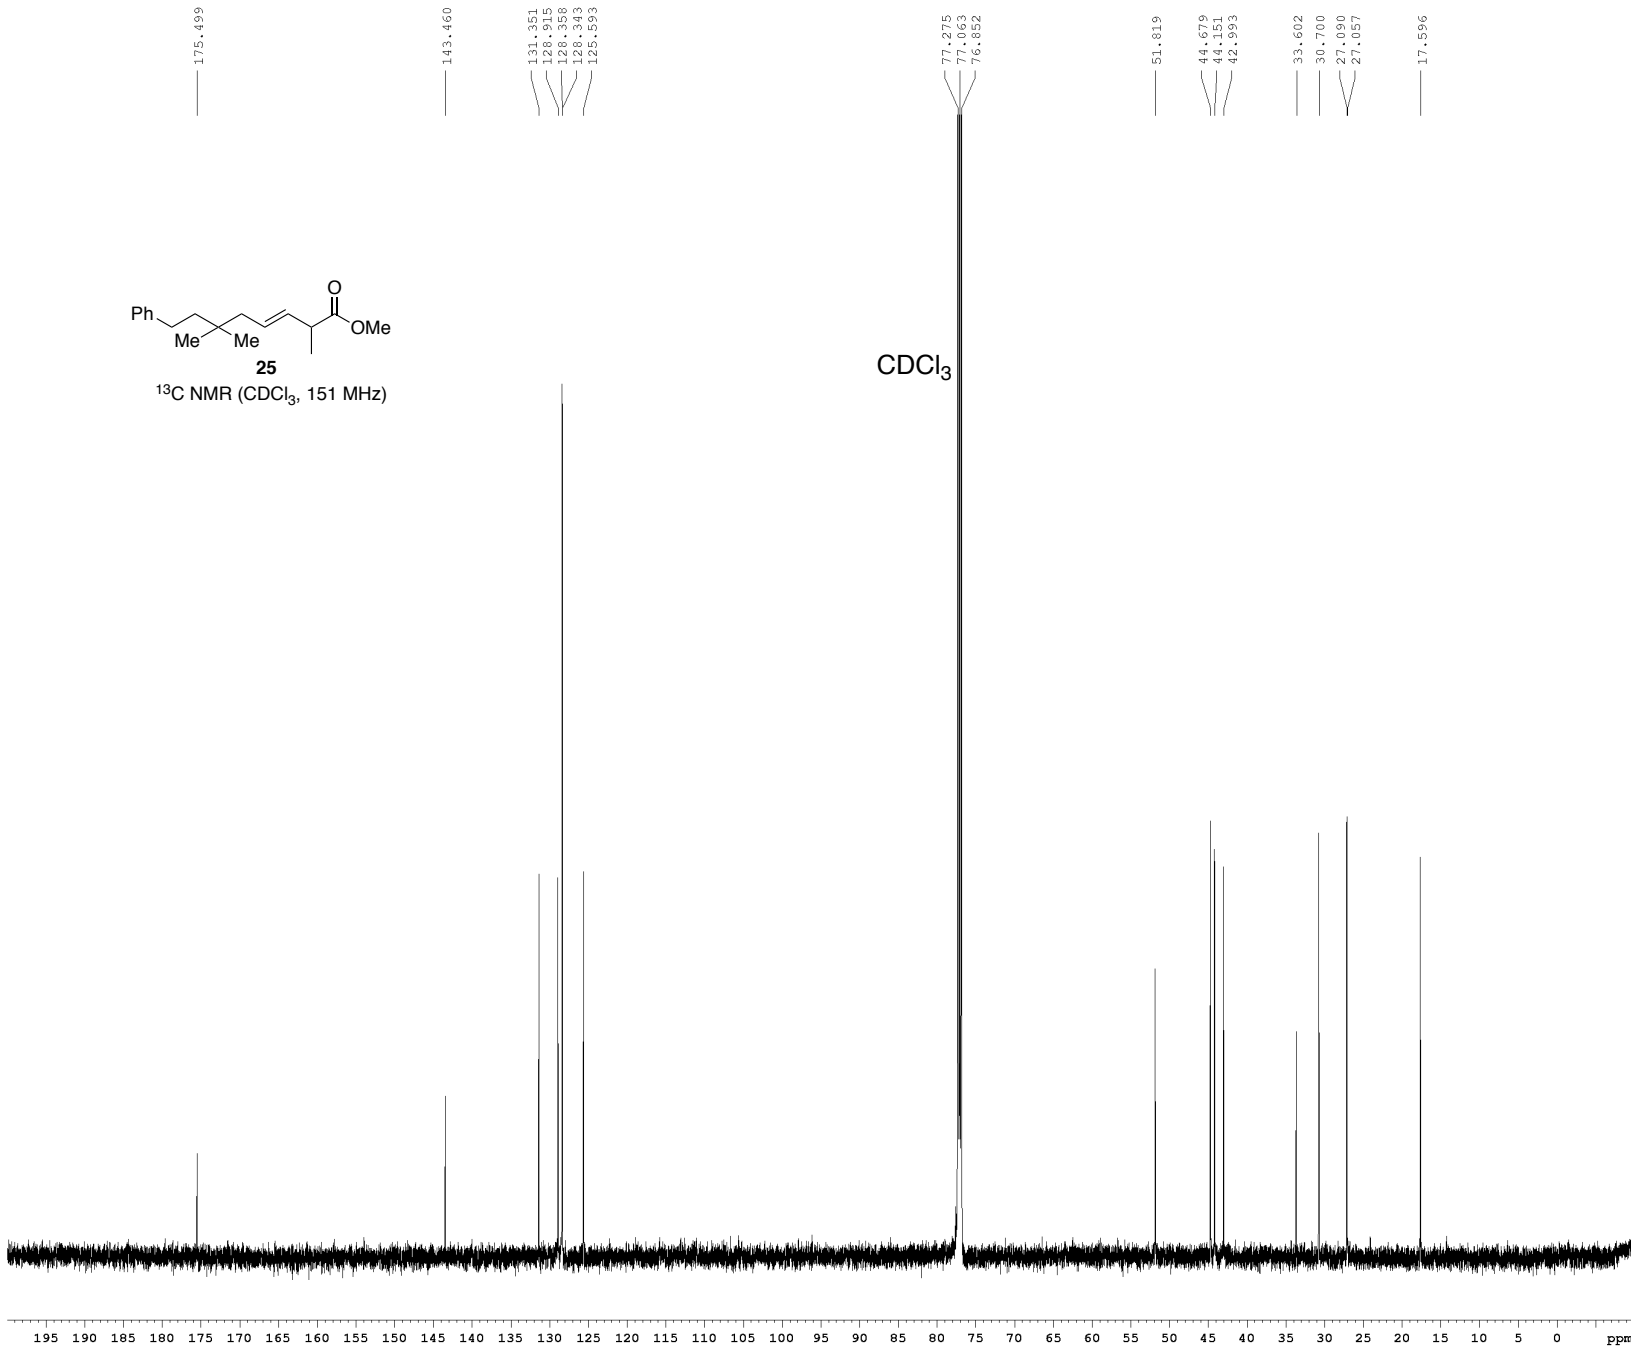

<sup>1</sup>H spectrum

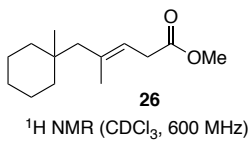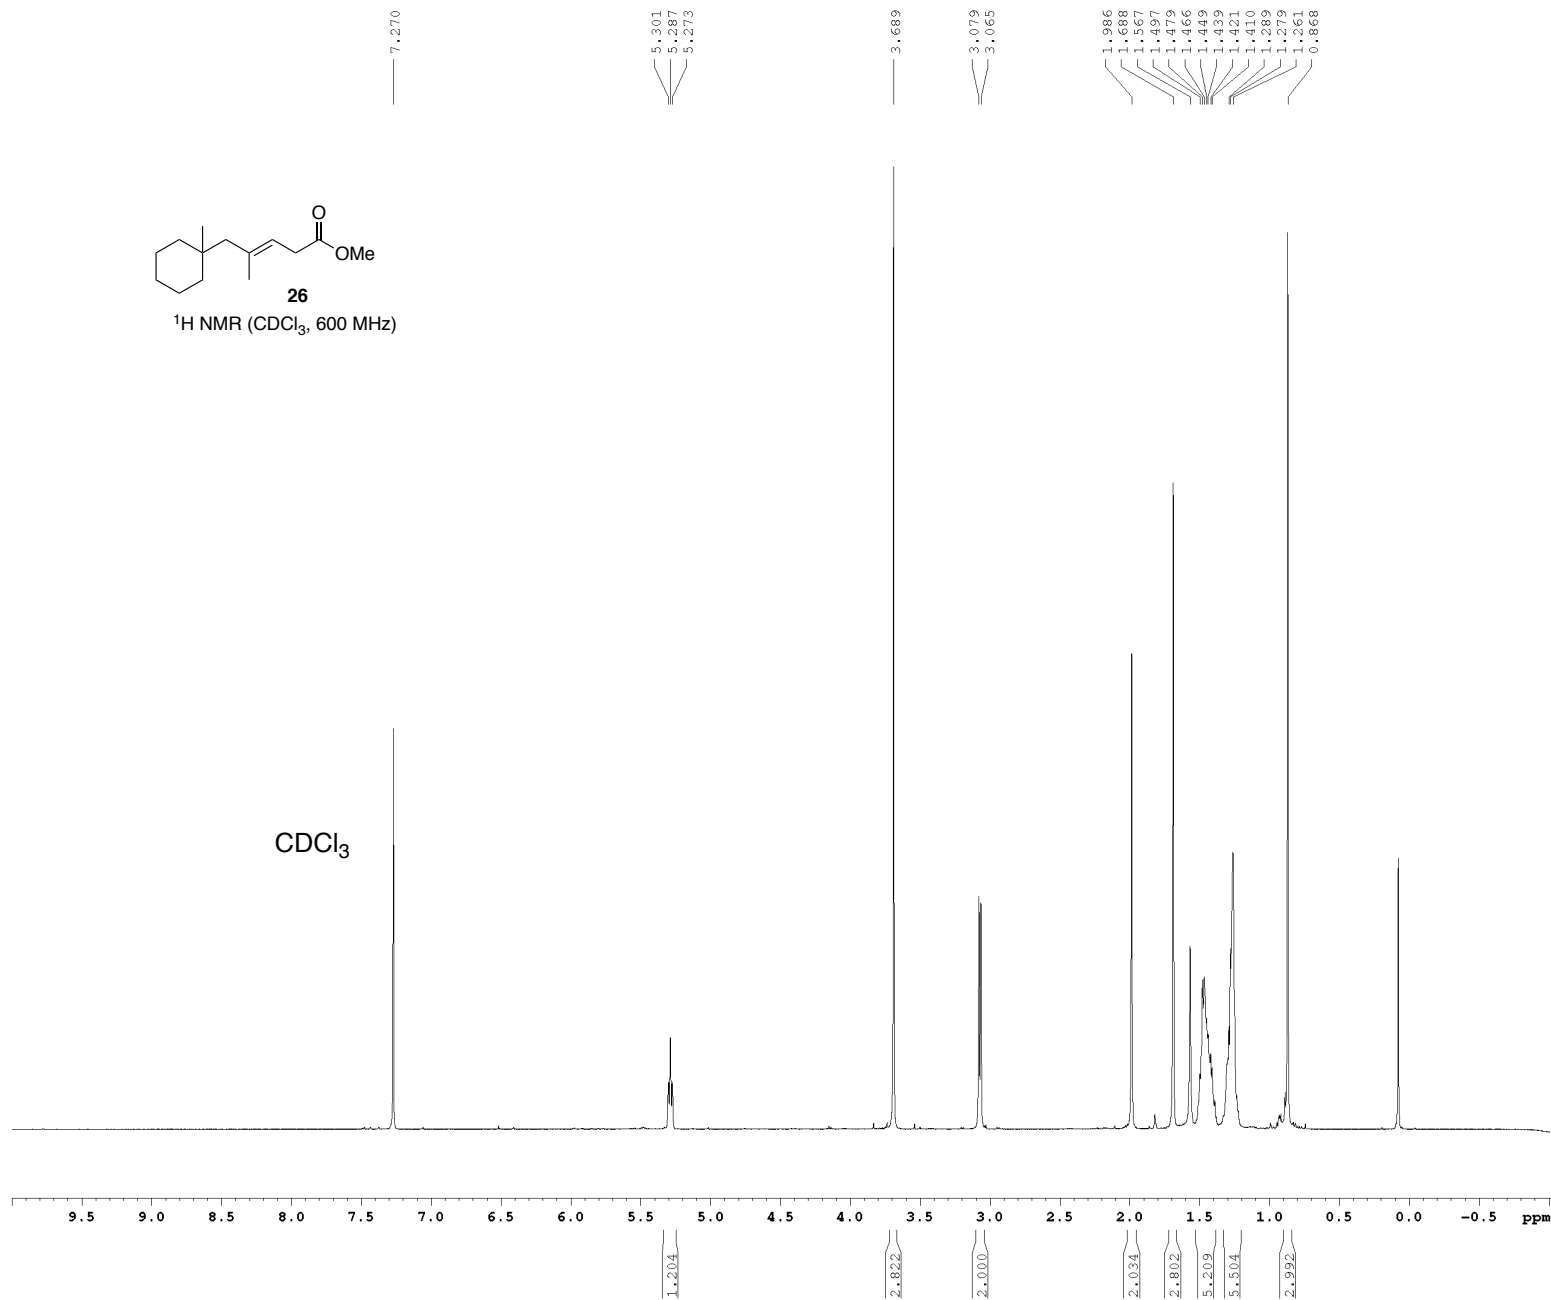

Current Data Parameters  
 NAME F2-2112-#10  
 EXPNO 1  
 PROCNO 1  
 DATPATH /v/data/zhaop3/nmr

F2 - Acquisition Parameters  
 Date\_ 20170319  
 Time 16.43  
 INSTRUM cryo500  
 PROBHD 5 mm CPTCI 1H-  
 PULPROG zg30  
 TD 61728  
 SOLVENT CDCl3  
 NS 8  
 DS 2  
 SWH 8012.820 Hz  
 FIDRES 0.098043 Hz  
 AQ 5.0998273 sec  
 RG 7.1  
 DW 62.400 usec  
 DE 6.00 usec  
 TE 298.0 K  
 D1 0.10000000 sec  
 MCREST 0 sec  
 MCWPK 0.01500000 sec

===== CHANNEL f1 =====  
 NUC1 1H  
 P1 7.50 usec  
 PL1 1.60 dB  
 SFO1 500.2235015 MHz

F2 - Processing parameters  
 SI 65536  
 SF 500.2200265 MHz  
 WDW EM  
 SSB 0  
 LB 0.30 Hz  
 GB 0  
 PC 1.00

# **<sup>13</sup>C spectrum with <sup>1</sup>H decoupling**

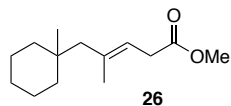

<sup>13</sup>C NMR (CDCl<sub>3</sub>, 151 MHz)

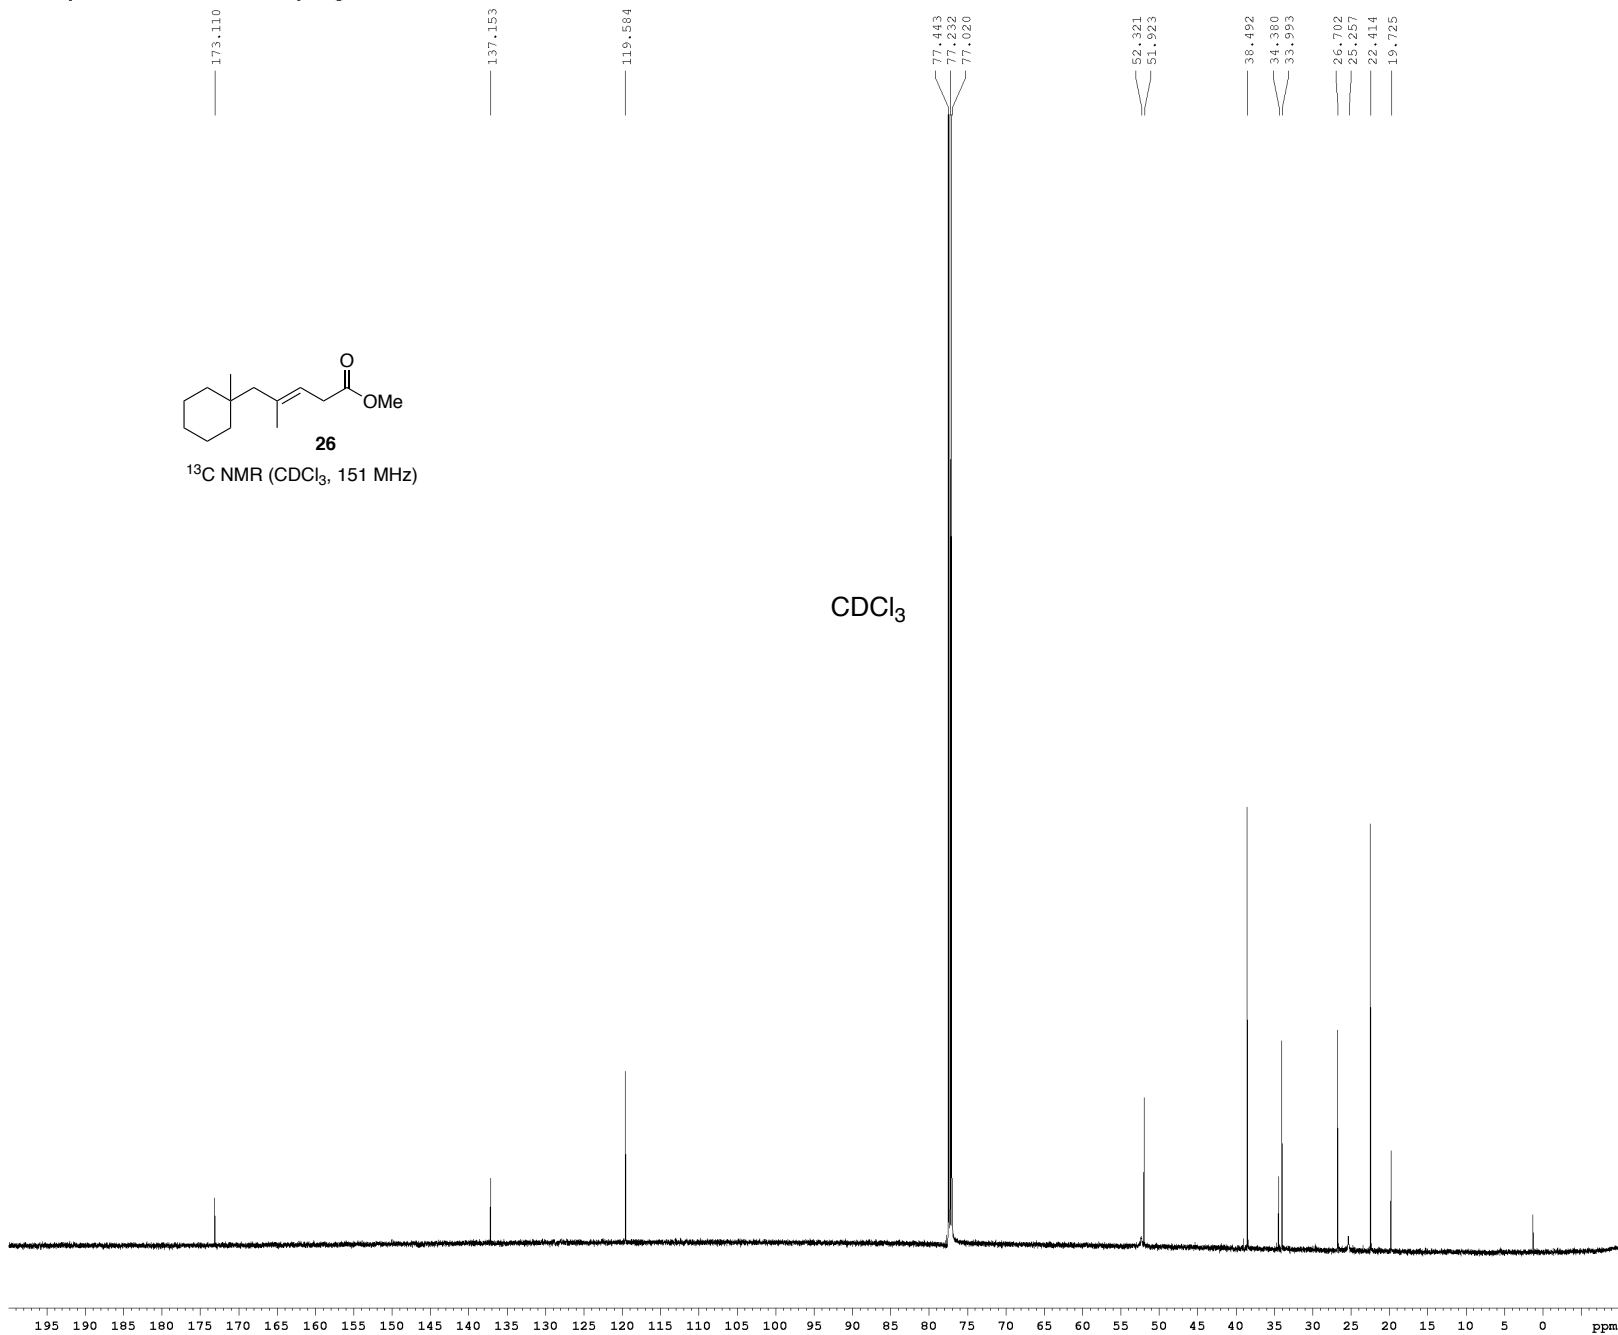

```

Current Data Parameters
NAME      F2-2112-#10
EXPNO     2
PROCNO    1
DATPATH   /v/data/zhaop3/nmr

F2 - Acquisition Parameters
Date_     20170320
Time      10.27
INSTRUM   av600
PROBHD    5 mm CPBBO BB-
PULPROG   zgpg30
TD         65536
SOLVENT   CDCl3
NS         500
DS         4
SWH        36231.883 Hz
FIDRES     0.552855 Hz
AQ         0.9043968 sec
RG         2050
DW         13.800 usec
DE         19.65 usec
TE         298.0 K
D1         0.40000001 sec
D11        0.03000000 sec
TD0        1

===== CHANNEL f1 =====
SFO1      150.9194080 MHz
NUC1       13C
P1         10.00 usec
PLW1       64.00000000 W

===== CHANNEL f2 =====
SFO2      600.1330010 MHz
NUC2       1H
CQPRG12   waltz16
PCPD2      80.00 usec
PLW2       20.00000000 W
PLW12      0.36000001 W

F2 - Processing parameters
SI         65536
SF         150.9027820 MHz
WDW        EM
SSB        0
LB         1.00 Hz
GB         0
PC         1.00
    
```

<sup>1</sup>H spectrum

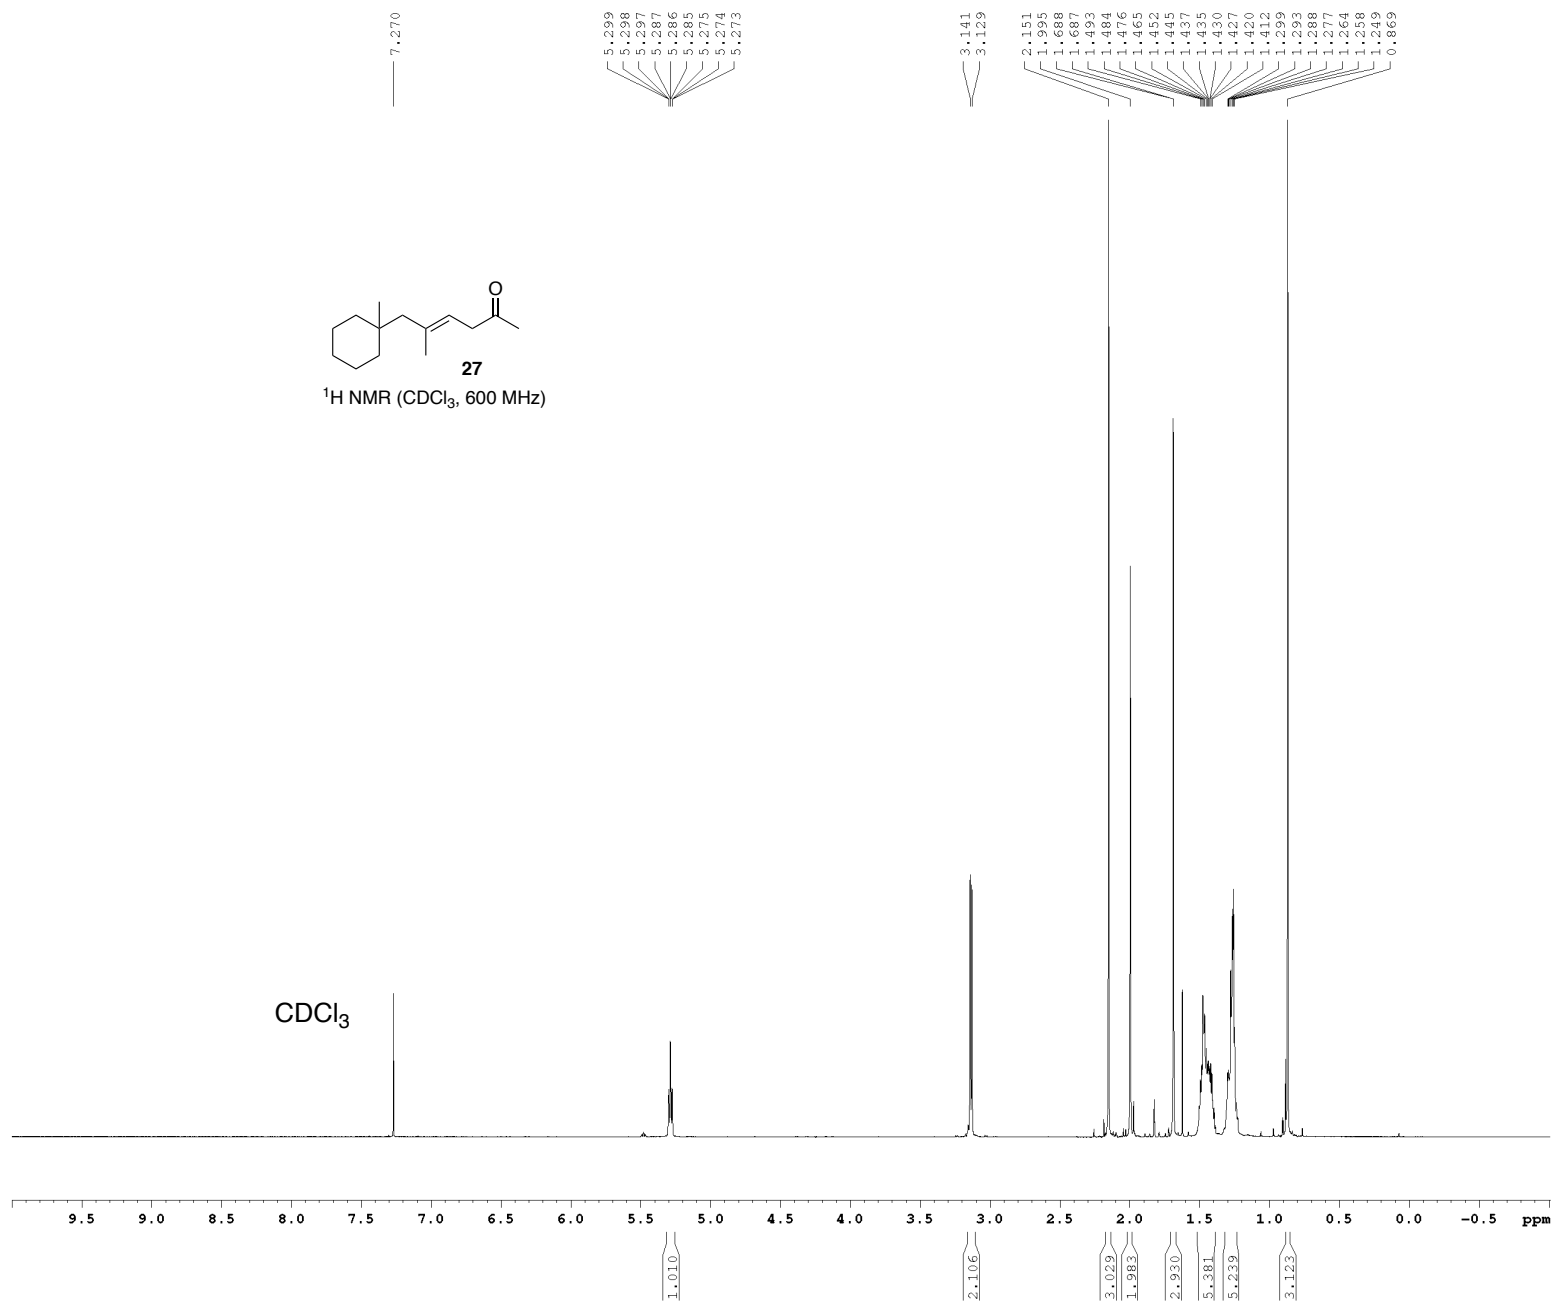

Current Data Parameters  
 NAME F2-2151-P  
 EXPNO 2  
 PROCNO 1  
 DATPATH /v/data/zhaop3/nmr

F2 - Acquisition Parameters  
 Date\_ 20170419  
 Time 14.31  
 INSTRUM av600  
 PROBHD 5 mm CPBBO BB-  
 PULPROG zg30  
 TD 98074  
 SOLVENT CDCl3  
 NS 8  
 DS 2  
 SWH 9615.385 Hz  
 FIDRES 0.098042 Hz  
 AQ 5.0998478 sec  
 RG 10  
 DW 52.000 usec  
 DE 13.70 usec  
 TE 298.0 K  
 D1 0.10000000 sec  
 TDO 1

===== CHANNEL f1 =====  
 SFO1 600.1342009 MHz  
 NUC1 1H  
 P1 12.00 usec  
 PLW1 20.00000000 W

F2 - Processing parameters  
 SI 65536  
 SF 600.1300281 MHz  
 WDW EM  
 SSB 0  
 LB 0.30 Hz  
 GB 0  
 PC 1.00



**<sup>13</sup>C spectrum with <sup>1</sup>H decoupling**

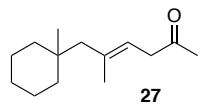

<sup>13</sup>C NMR (CDCl<sub>3</sub>, 151 MHz)

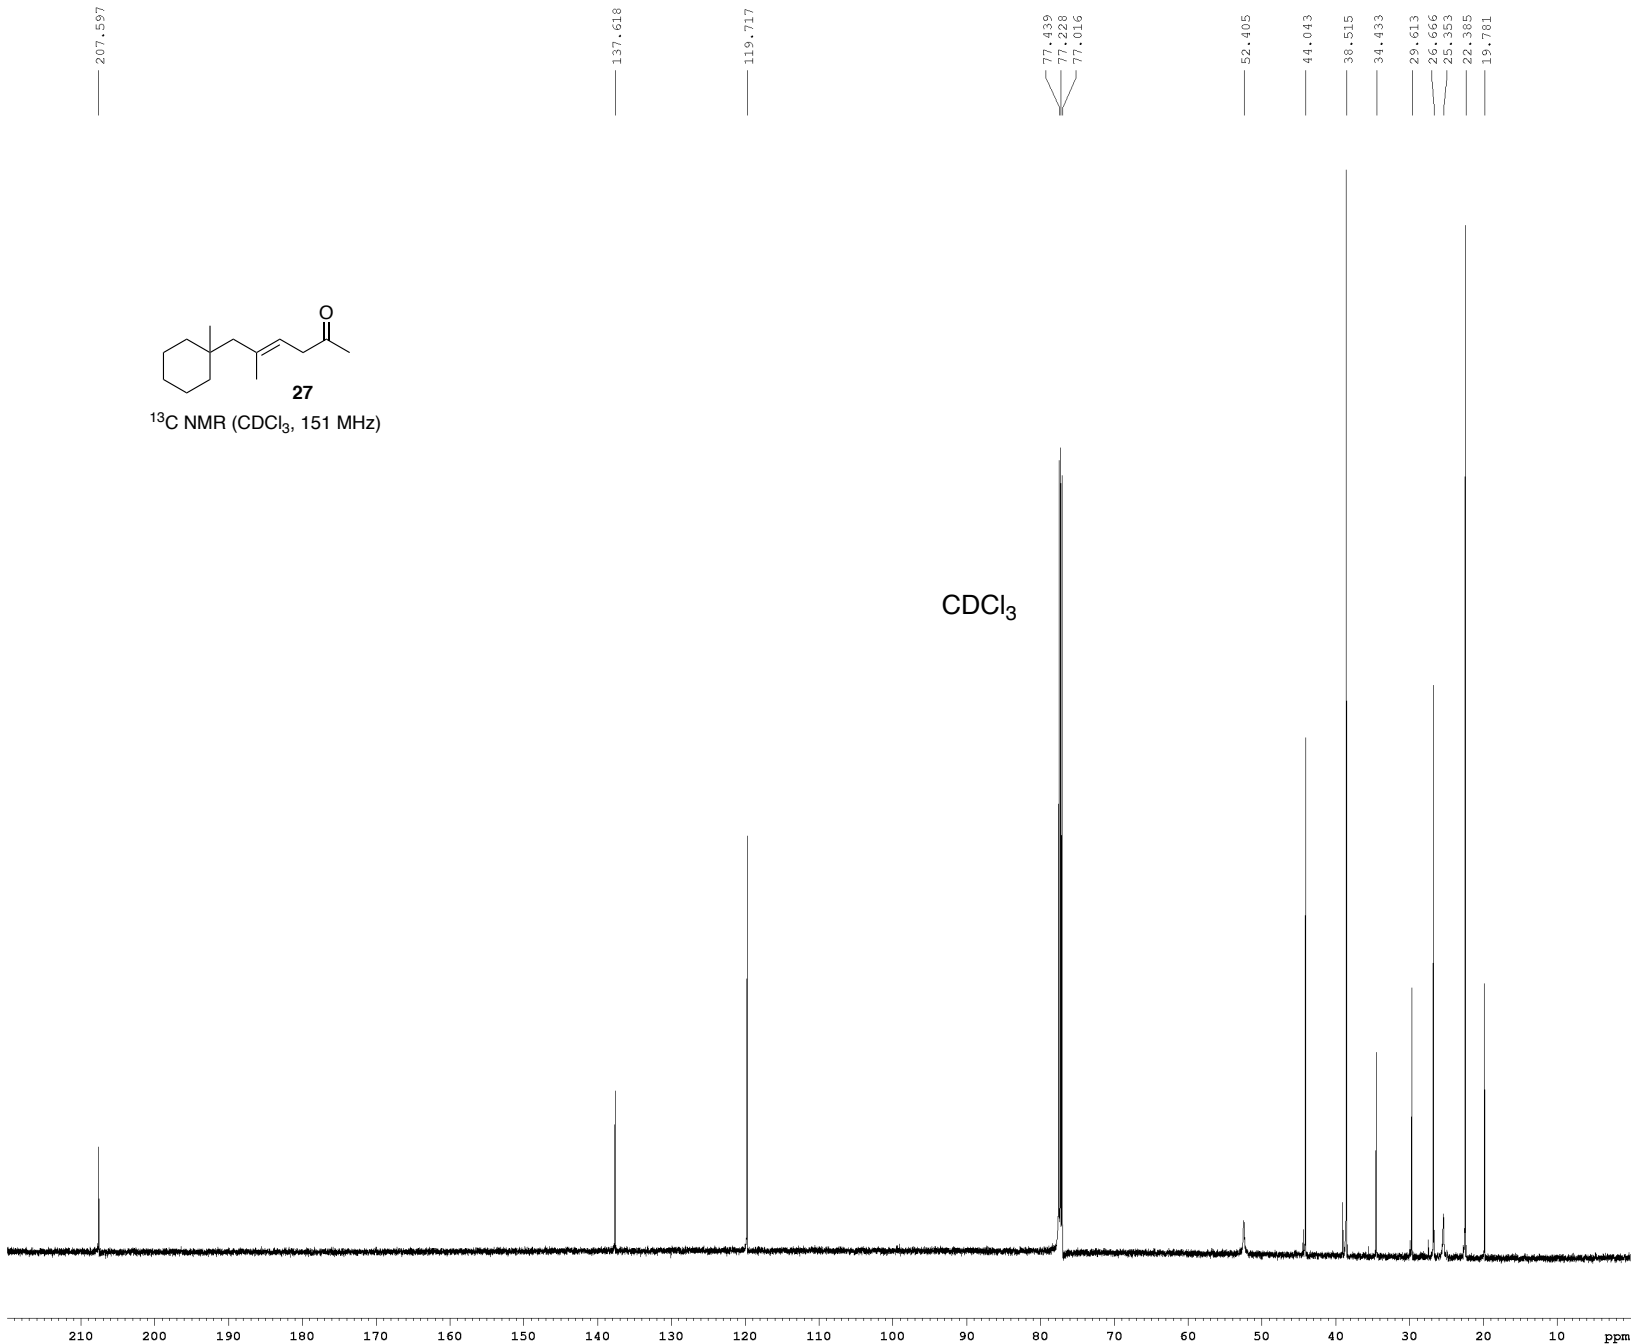

```

Current Data Parameters
NAME      PS-2151-P
EXPNO     4
PROCNO    1
DATPATH   /v/data/zhaop3/nmr

F2 - Acquisition Parameters
Date_     20170413
Time      15.49
INSTRUM   av600
PROBHD    5 mm CPBBO BB-
PULPROG   zgpg30
TD         65536
SOLVENT    CDCl3
NS         160
DS         4
SWH        36231.889 Hz
FIDRES     0.552855 Hz
AQ         0.9043968 sec
RG         2050
DW         13.800 usec
DE         19.65 usec
TE         298.0 K
D1         0.40000001 sec
D11        0.03000000 sec
TD0        1

===== CHANNEL f1 =====
SFO1      150.9194080 MHz
NUC1       13C
P1         10.00 usec
PLW1       64.00000000 W

===== CHANNEL f2 =====
SFO2      600.1330010 MHz
NUC2       1H
CPDPRG2    waltz16
PCPD2      80.00 usec
PLW2       20.00000000 W
PLW12      0.36000001 W

F2 - Processing parameters
SI         65536
SF         150.9027836 MHz
WDW        EM
SSB        0
LB         1.00 Hz
GB         0
PC         1.00
    
```

S53

# **<sup>13</sup>C spectrum with <sup>1</sup>H decoupling**

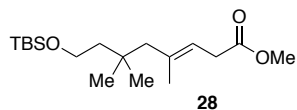

<sup>13</sup>C NMR (CDCl<sub>3</sub>, 151 MHz)

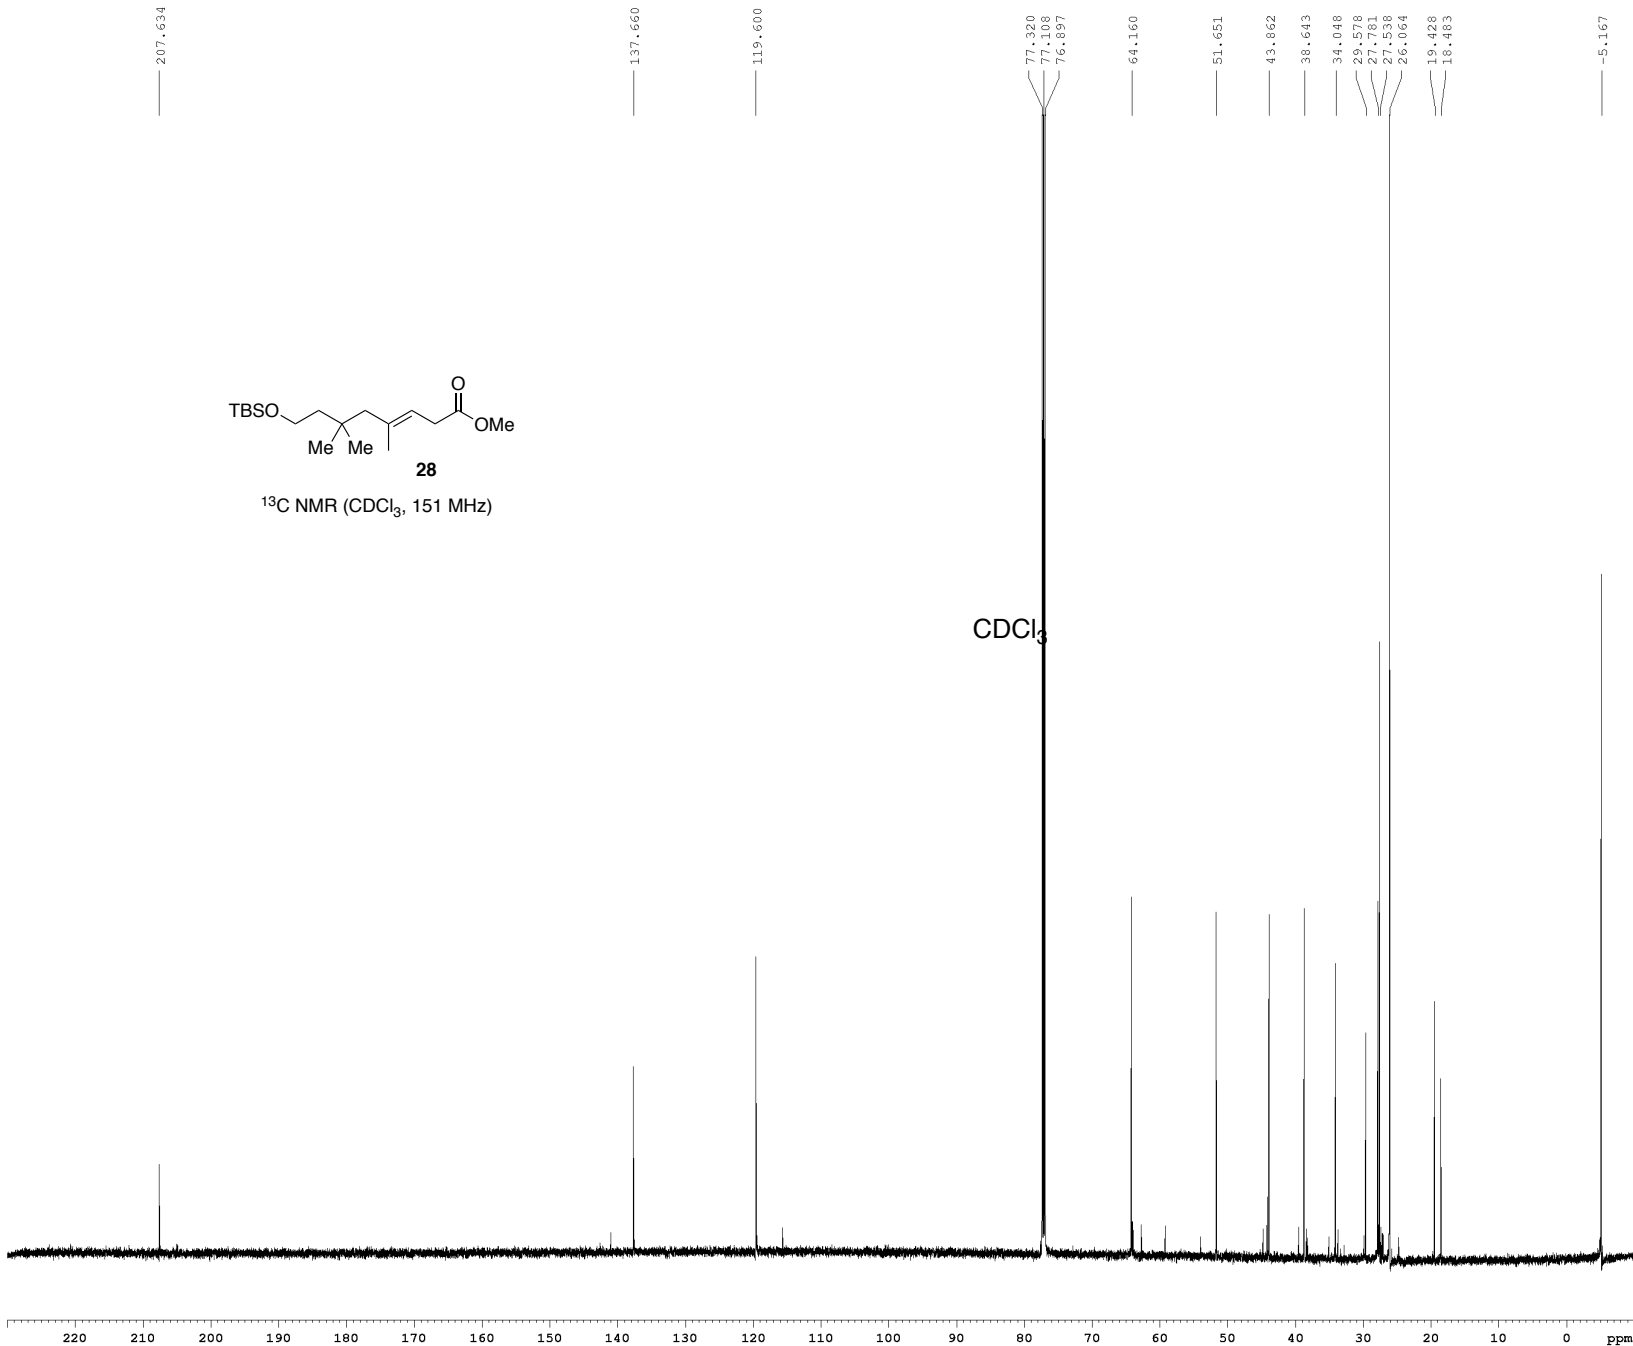

```

Current Data Parameters
NAME      F2-4040-#19
EXPNO     2
PROCNO    1
DATPATH   /v/data/zhaop3/nmr

F2 - Acquisition Parameters
Date_     20171110
Time      10.38
INSTRUM   av600
PROBHD    5 mm CPBBO BB-
PULPROG   zgpg30
TD         65536
SOLVENT    CDCl3
NS         226
DS         4
SWH        36231.883 Hz
FIDRES     0.552855 Hz
AQ         0.9043968 sec
RG         2050
DW         13.800 usec
DE         19.65 usec
TE         284.9 K
D1         0.40000001 sec
D11        0.03000000 sec
TD0        1

===== CHANNEL f1 =====
SFO1      150.9194080 MHz
NUC1       13C
P1        10.00 usec
PLW1      64.00000000 W

===== CHANNEL f2 =====
SFO2      600.1330010 MHz
NUC2       1H
CPDPRG2    waltz16
PCPD2      80.00 usec
PLW2      20.00000000 W
PLW12     0.36000001 W

F2 - Processing parameters
SI         65536
SF         150.9028085 MHz
WDW        EM
SSB        0
LB         1.00 Hz
GB         0
PC         1.00
    
```

<sup>1</sup>H spectrum

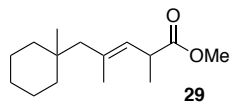

<sup>1</sup>H NMR (CDCl<sub>3</sub>, 600 MHz)

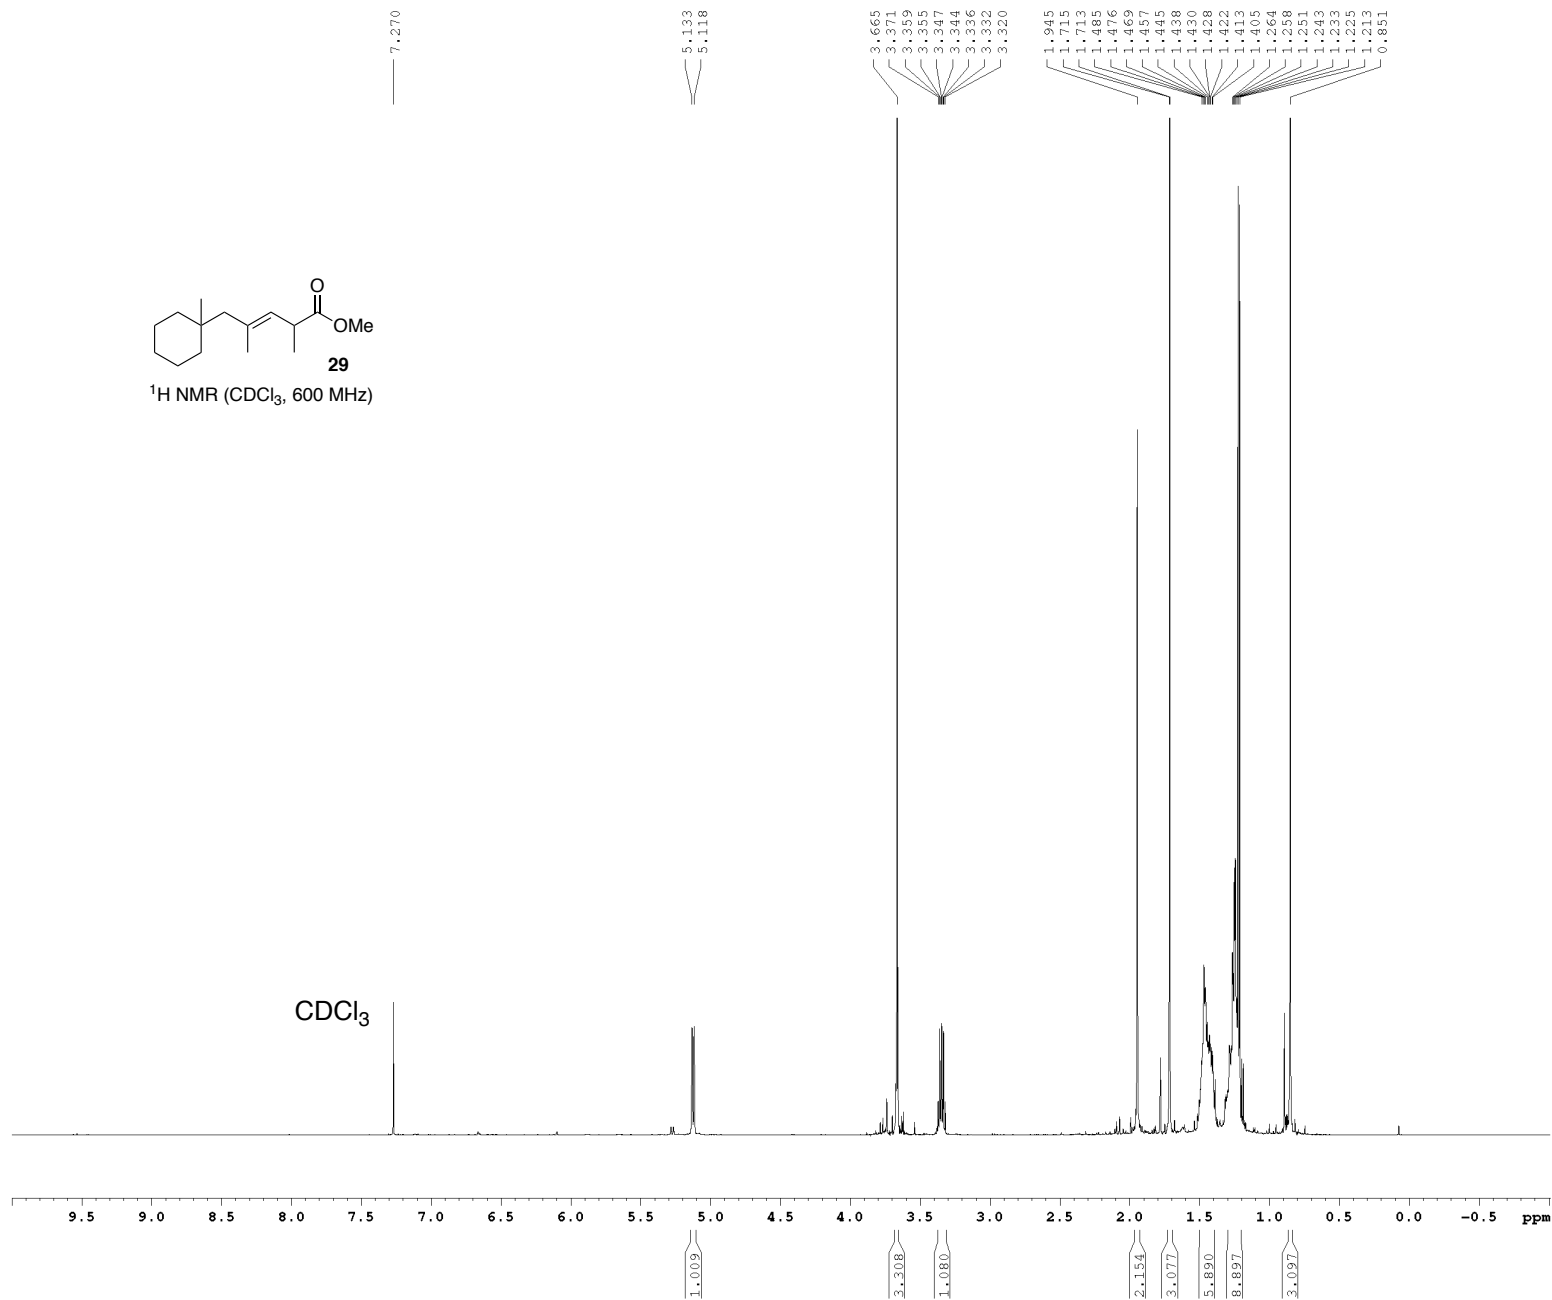

Current Data Parameters  
 NAME PZ-2151-D  
 EXPNO 1  
 PROCNO 1  
 DATPATH /v/data/zhaop3/nmr

F2 - Acquisition Parameters  
 Date 20170421  
 Time 12.10  
 INSTRUM av600  
 PROBHD 5 mm CPBBO BB-  
 FULPROG zg30  
 TD 98074  
 SOLVENT CDCl3  
 NS 8  
 DS 2  
 SWH 9615.385 Hz  
 FIDRES 0.098042 Hz  
 AQ 5.0998478 sec  
 RG 20.2  
 DW 52.000 usec  
 DE 13.70 usec  
 TE 298.0 K  
 D1 0.10000000 sec  
 TD0 1

===== CHANNEL f1 =====  
 SFO1 600.1342009 MHz  
 NUC1 1H  
 P1 12.00 usec  
 PLW1 20.00000000 W

F2 - Processing parameters  
 SI 65536  
 SF 600.1300279 MHz  
 WDW EM  
 SSB 0  
 LB 0.30 Hz  
 GB 0  
 PC 1.00

# Z-restored spin-echo <sup>13</sup>C spectrum with 1H decoupling

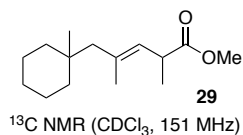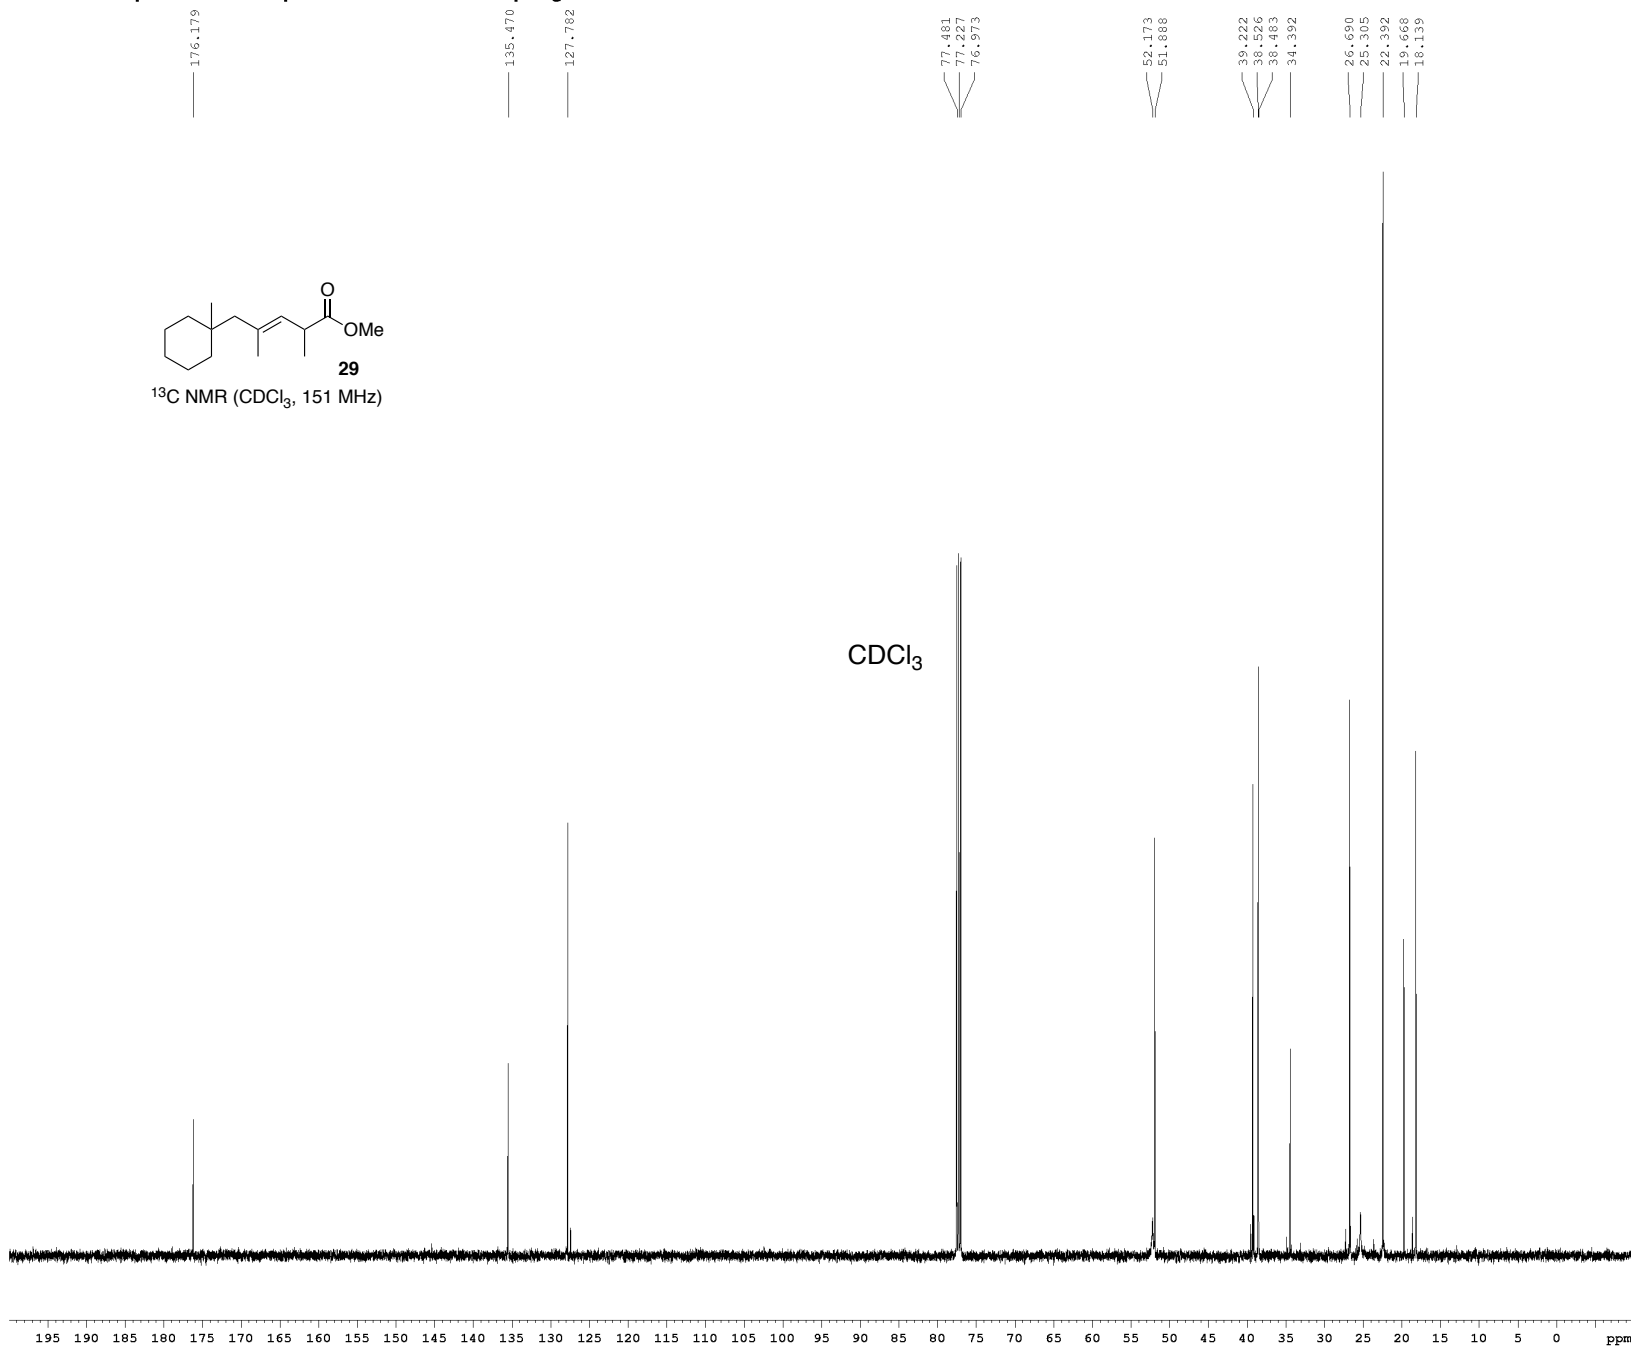

```

Current Data Parameters
NAME          SL-158-13C
EXPNO         1
PROCNO        1
DATAPATH      /v/data/zhaop3/nmr

F2 - Acquisition Parameters
Date_         20161030
Time          12.21
INSTRUM       cryo500
PROBHD        5 mm CPTCI 1H-
PULPROG       SpinEchopg30gp.prd
TD            65536
SOLVENT       CDCl3
NS            256
DS            16
SWH           30303.031 Hz
FIDRES        0.462388 Hz
AQ            1.0813440 sec
RG            4096
DW            16.500 usec
DE            6.00 usec
TE            298.0 K
D1            0.25000000 sec
d11           0.03000000 sec
D16           0.00020000 sec
d17           0.00019600 sec
MCREST        0 sec
MCWRK         0.01500000 sec
F2            33.10 usec

===== CHANNEL f1 =====
NUC1           13C
P1            16.55 usec
P11           500.00 usec
P12           2000.00 usec
PL0           120.00 dB
PL1           -1.00 dB
SFO1          125.7942548 MHz
SF1           2.70 dB
SF2           2.70 dB
SFOFF[1]      Crip60,0.5,20.1
SFOFF[2]      Crip60comp.4
SFOFF1        0 Hz
SFOFF2        0 Hz

===== CHANNEL f2 =====
CPDPRG2       waltz16
NUC2           1H
PCPD2         100.00 usec
PL2           1.60 dB
PL12          24.50 dB
SFO2          500.2225011 MHz

===== GRADIENT CHANNEL =====
GPNAM[1]      SINE.100
GPNAM[2]      SINE.100
GPX1          0 %
GPX2          0 %
GPY1          0 %
GPY2          0 %
GPD1          30.00 %
GPD2          50.00 %
p15           500.00 usec
p16           1000.00 usec

F2 - Processing parameters
SI            65536
SF            125.7803996 MHz
WDW           EM
SSB           0
LB            1.00 Hz
GB            0
PC            2.00
  
```

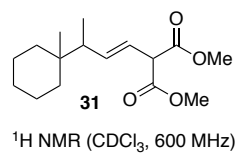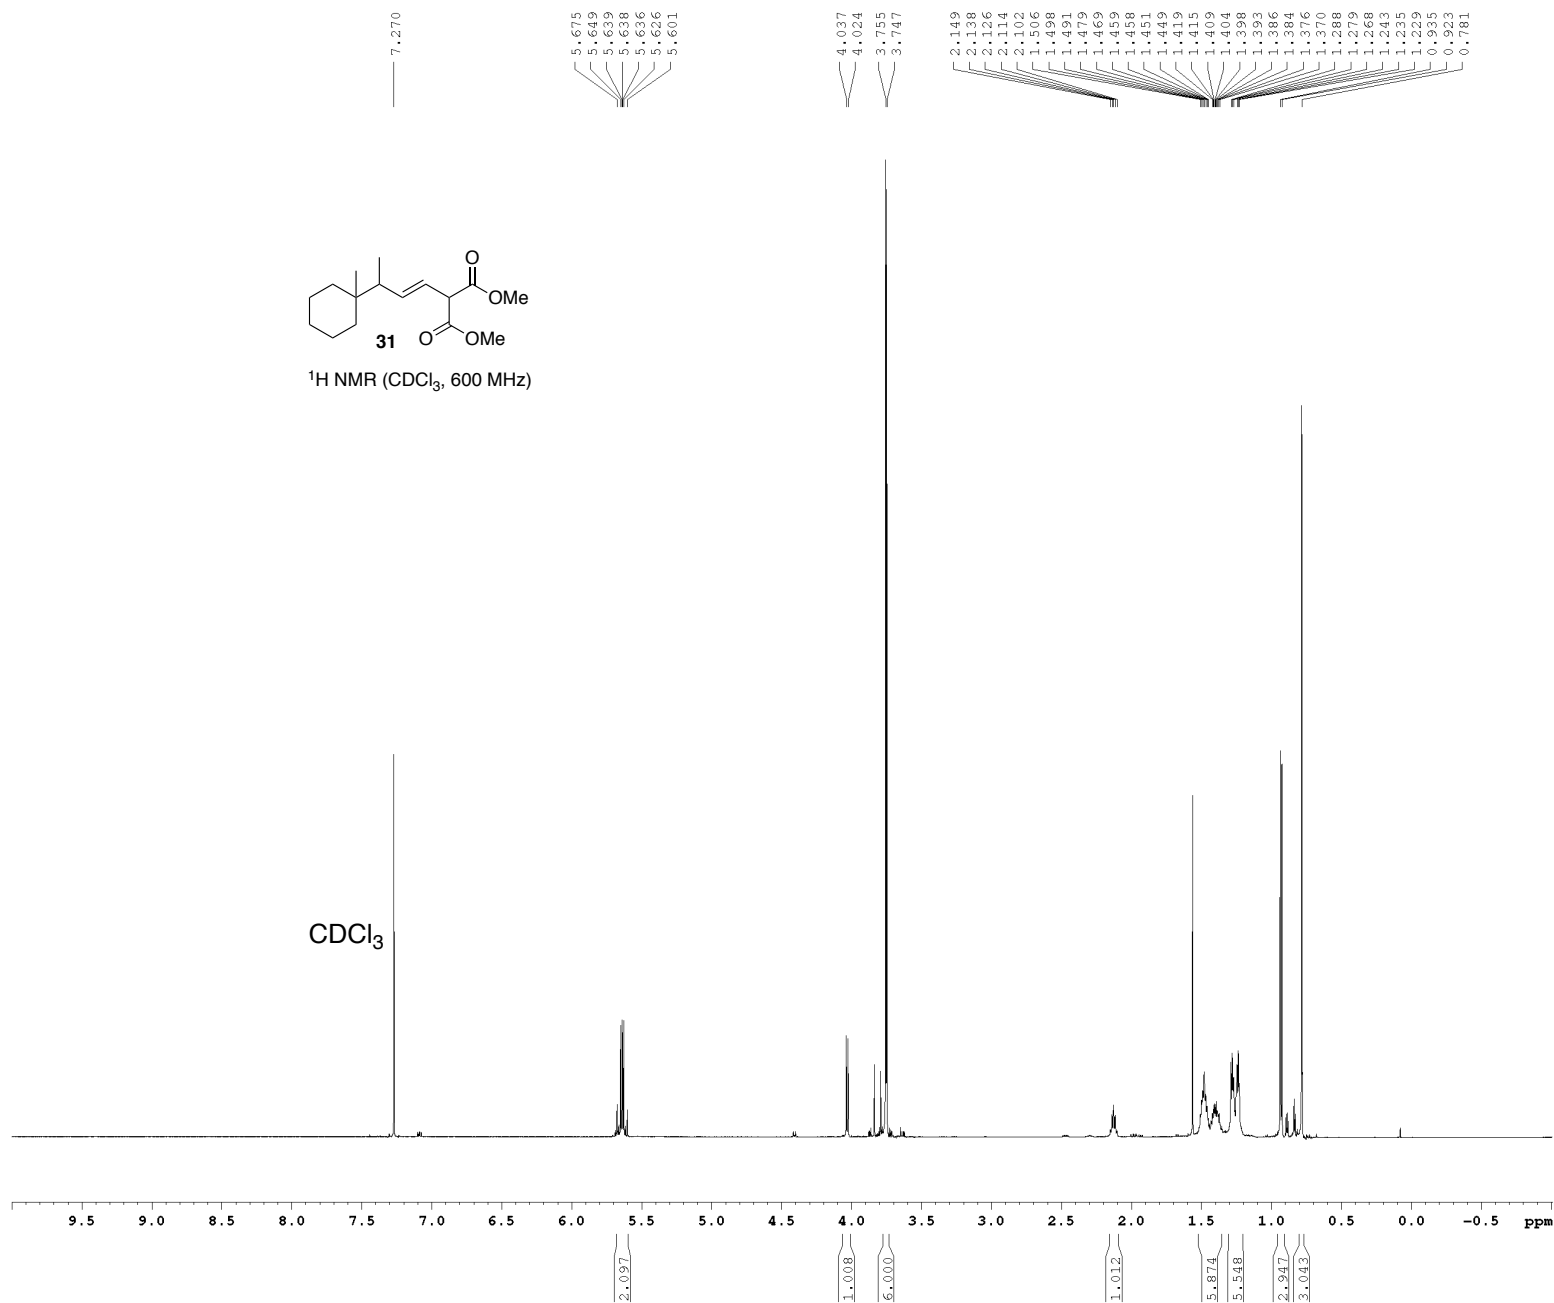

Current Data Parameters  
 NAME P2-2150-F  
 EXPNO 8  
 PROCNO 1  
 DATPATH /v/data/zhaop3/nmr

F2 - Acquisition Parameters  
 Date\_ 20170420  
 Time 14.04  
 INSTRUM av600  
 PROBHD 5 mm CPBBO BB-  
 PULPROG zg30  
 TD 98074  
 SOLVENT CDCl3  
 NS 8  
 DS 2  
 SWH 9615.385 Hz  
 FIDRES 0.098042 Hz  
 AQ 5.0998478 sec  
 RG 18  
 DW 52.000 usec  
 DE 13.70 usec  
 TE 298.0 K  
 D1 0.10000000 sec  
 TD0 1

===== CHANNEL f1 =====  
 SF01 600.1342009 MHz  
 NUC1 1H  
 P1 12.00 usec  
 PLW1 20.00000000 W

F2 - Processing parameters  
 SI 65536  
 SF 600.1300281 MHz  
 WDW EM  
 SSB 0  
 LB 0.30 Hz  
 GB 0  
 FC 1.00

# **<sup>13</sup>C spectrum with <sup>1</sup>H decoupling**

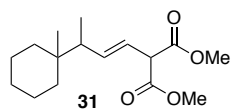

<sup>13</sup>C NMR (CDCl<sub>3</sub>, 151 MHz)

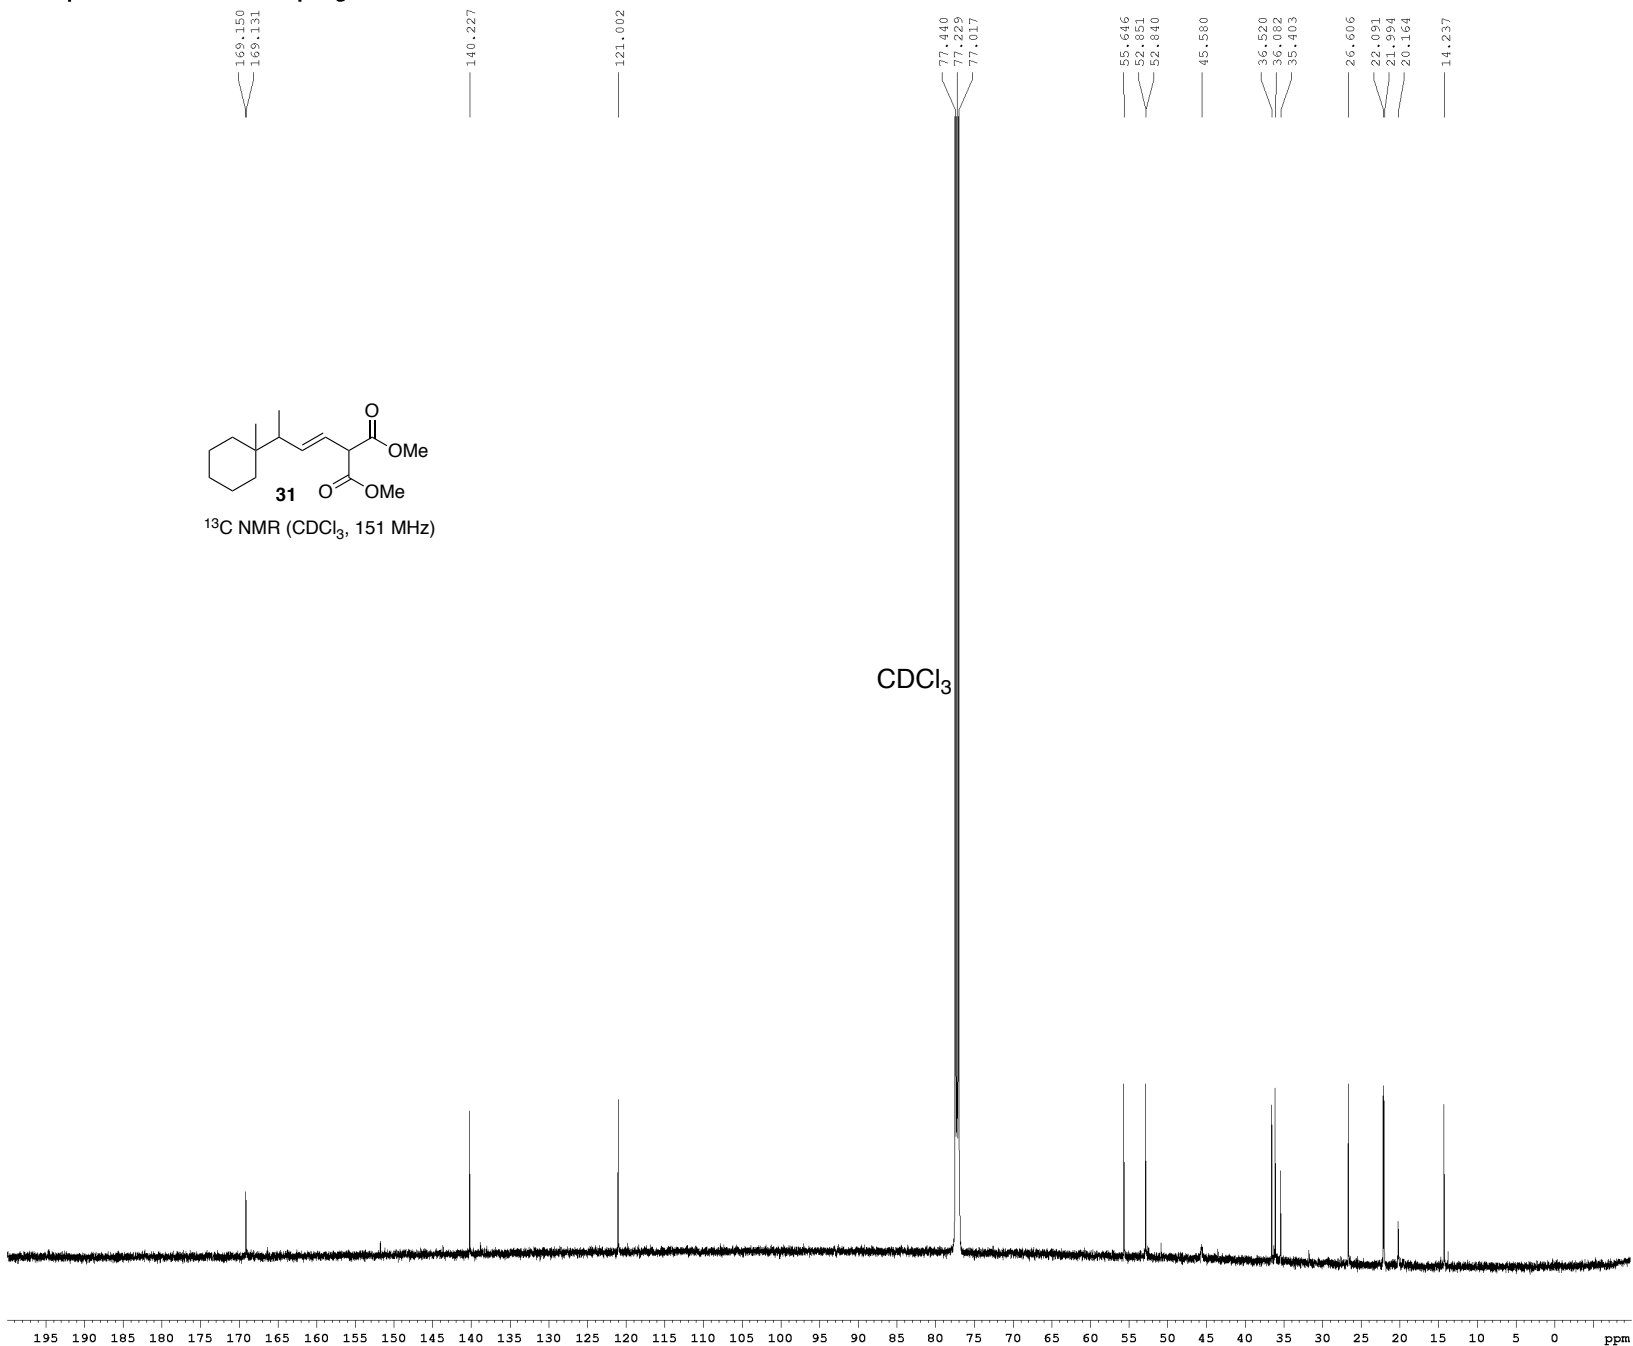

```

Current Data Parameters
NAME      F2-2150-P
EXPNO     10
PROCNO    1
DATPATH   /v/data/zhaop3/nmr

F2 - Acquisition Parameters
Date_     20170420
Time      14.14
INSTRUM   av600
PROBHD    5 mm CPBBO BB-
PULPROG   zgpg30
TD         65536
SOLVENT   CDCl3
NS         366
DS         4
SWH        36231.883 Hz
FIDRES     0.552855 Hz
AQ         0.9043968 sec
RG         2050
DW         13.800 usec
DE         19.65 usec
TE         298.0 K
D1         0.40000001 sec
D11        0.03000000 sec
TDO        1

===== CHANNEL f1 =====
SF01      150.9194080 MHz
NUC1       13C
P1        10.00 usec
PLW1      64.00000000 W

===== CHANNEL f2 =====
SF02      600.1330010 MHz
NUC2       1H
CPDPRG2   waltz16
PCPD2     80.00 usec
PLW2      20.00000000 W
PLW12     0.36000001 W

F2 - Processing parameters
SI         65536
SF         150.9027819 MHz
WDW        EM
SSB        0
LB         1.00 Hz
GB         0
PC         1.00
    
```

<sup>1</sup>H spectrum

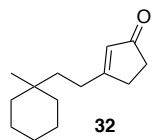

<sup>1</sup>H NMR (CDCl<sub>3</sub>, 600 MHz)

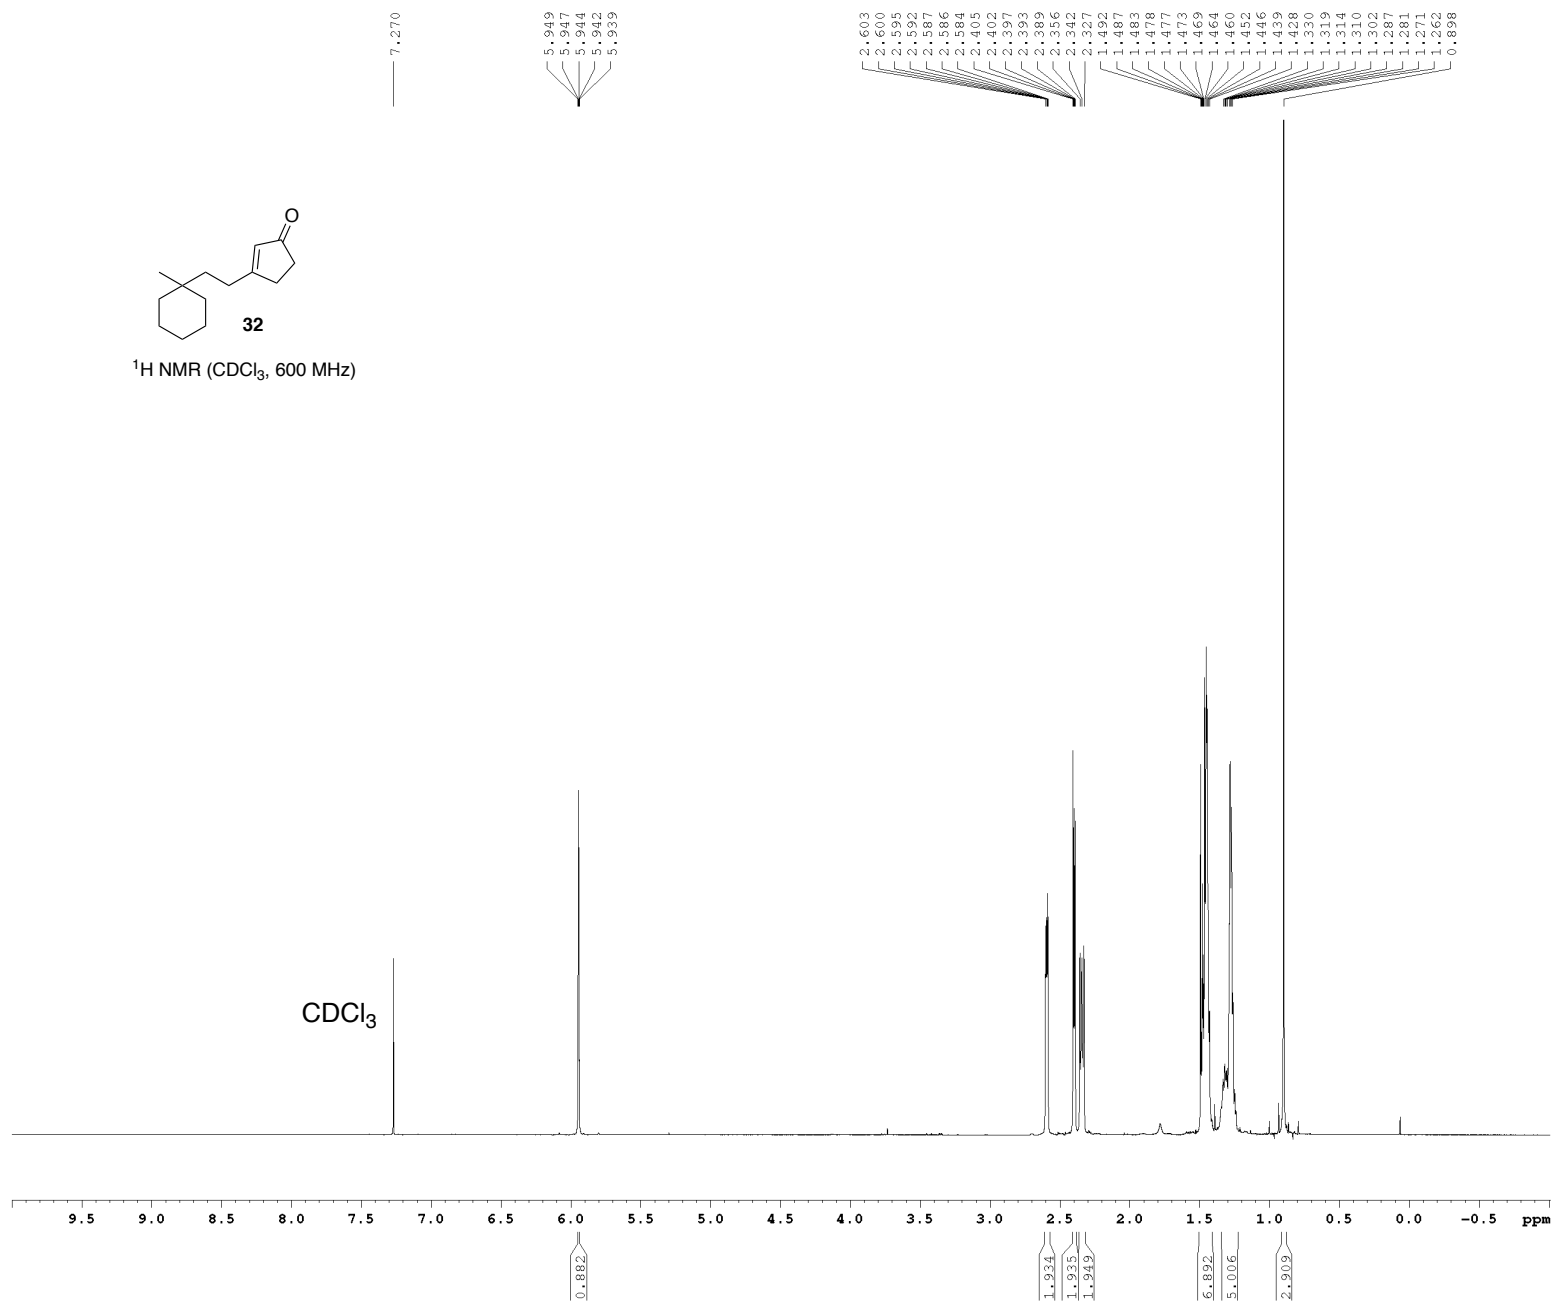

Current Data Parameters  
NAME PZ-2096-P  
EXPNO 1  
PROCNO 1  
DATPATH /v/data/zhaop3/nmr

F2 - Acquisition Parameters  
Date\_ 20170304  
Time 15.49  
INSTRUM av600  
PROBHD 5 mm CPBBO BB-  
PULPROG zg30  
TD 98074  
SOLVENT CDCl3  
NS 8  
DS 2  
SWH 9615.385 Hz  
FIDRES 0.098042 Hz  
AQ 5.0998478 sec  
RG 18  
DW 52.000 usec  
DE 13.70 usec  
TE 298.0 K  
D1 0.10000000 sec  
TD0 1

===== CHANNEL f1 =====  
SFO1 600.1342009 MHz  
NUC1 1H  
P1 12.00 usec  
PLW1 20.00000000 W

F2 - Processing parameters  
SI 65536  
SF 600.1300296 MHz  
WDW EM  
SSB 0  
LB 0.30 Hz  
GB 0  
PC 1.00



# **<sup>13</sup>C spectrum with 1H decoupling**

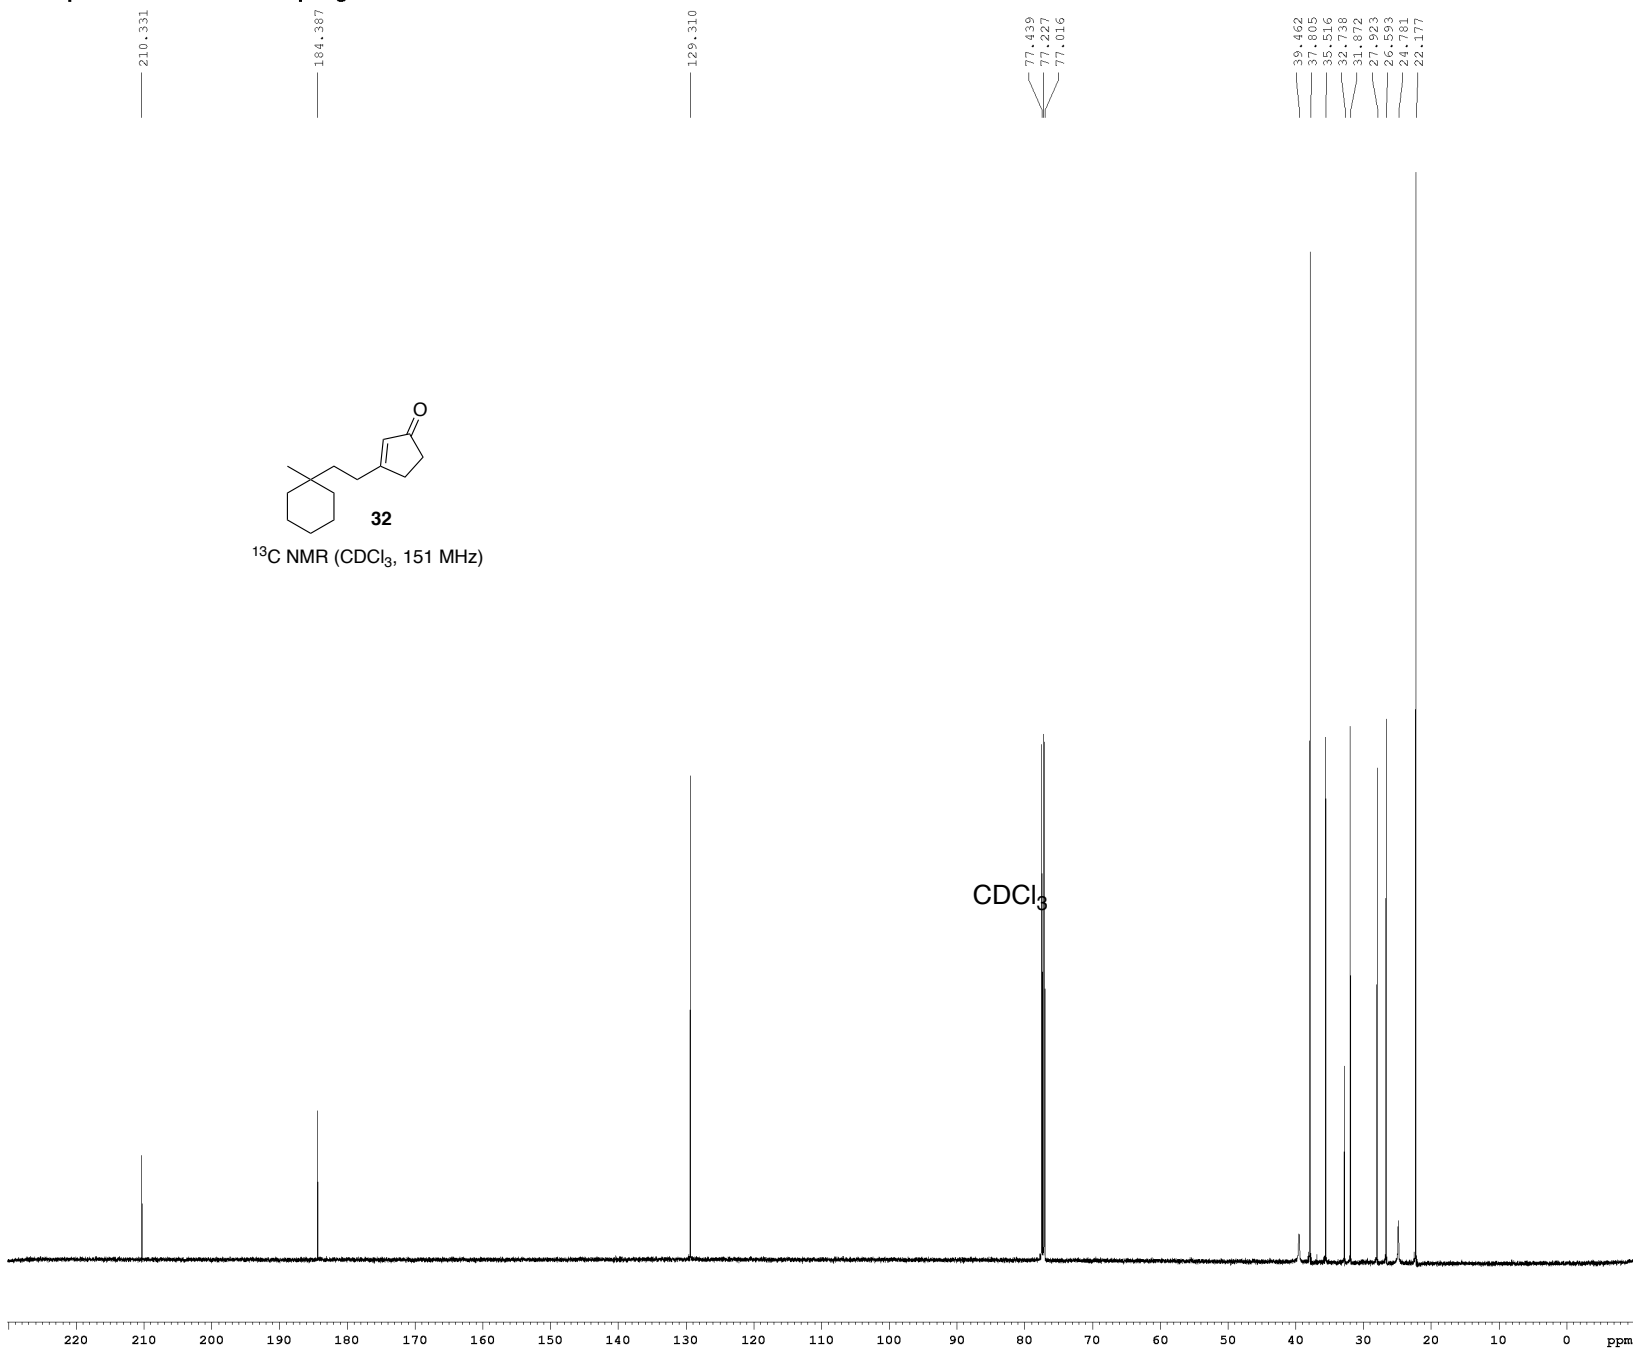

```

Current Data Parameters
NAME      F2-2096-P
EXPNO     2
PROCNO    1
DATPATH   /v/data/zhaop3/nmr

F2 - Acquisition Parameters
Date_     20170304
Time      15.53
INSTRUM   av600
PROBHD    5 mm CPBBO BB-
PULPROG   zgpg30
TD         65536
SOLVENT   cdcl3
NS         78
DS         4
SWH        36231.883 Hz
FIDRES     0.552855 Hz
AQ         0.9043968 sec
RG         2050
DW         13.800 usec
DE         19.65 usec
TE         298.0 K
D1         0.40000001 sec
D11        0.03000000 sec
TD0        1

===== CHANNEL f1 =====
SFO1      150.9194080 MHz
NUC1       13C
P1        10.00 usec
PLW1      64.00000000 W

===== CHANNEL f2 =====
SFO2      600.1330010 MHz
NUC2       1H
CPDPRG2   waltz16
PCPD2     80.00 usec
PLW2      20.00000000 W
PLW12     0.36000001 W

F2 - Processing parameters
SI         65536
SF         150.9027870 MHz
WDW        EM
SSB        0
LB         1.00 Hz
GB         0
PC         1.00
    
```

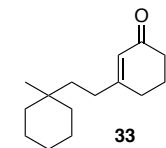

<sup>1</sup>H NMR (CDCl<sub>3</sub>, 600 MHz)

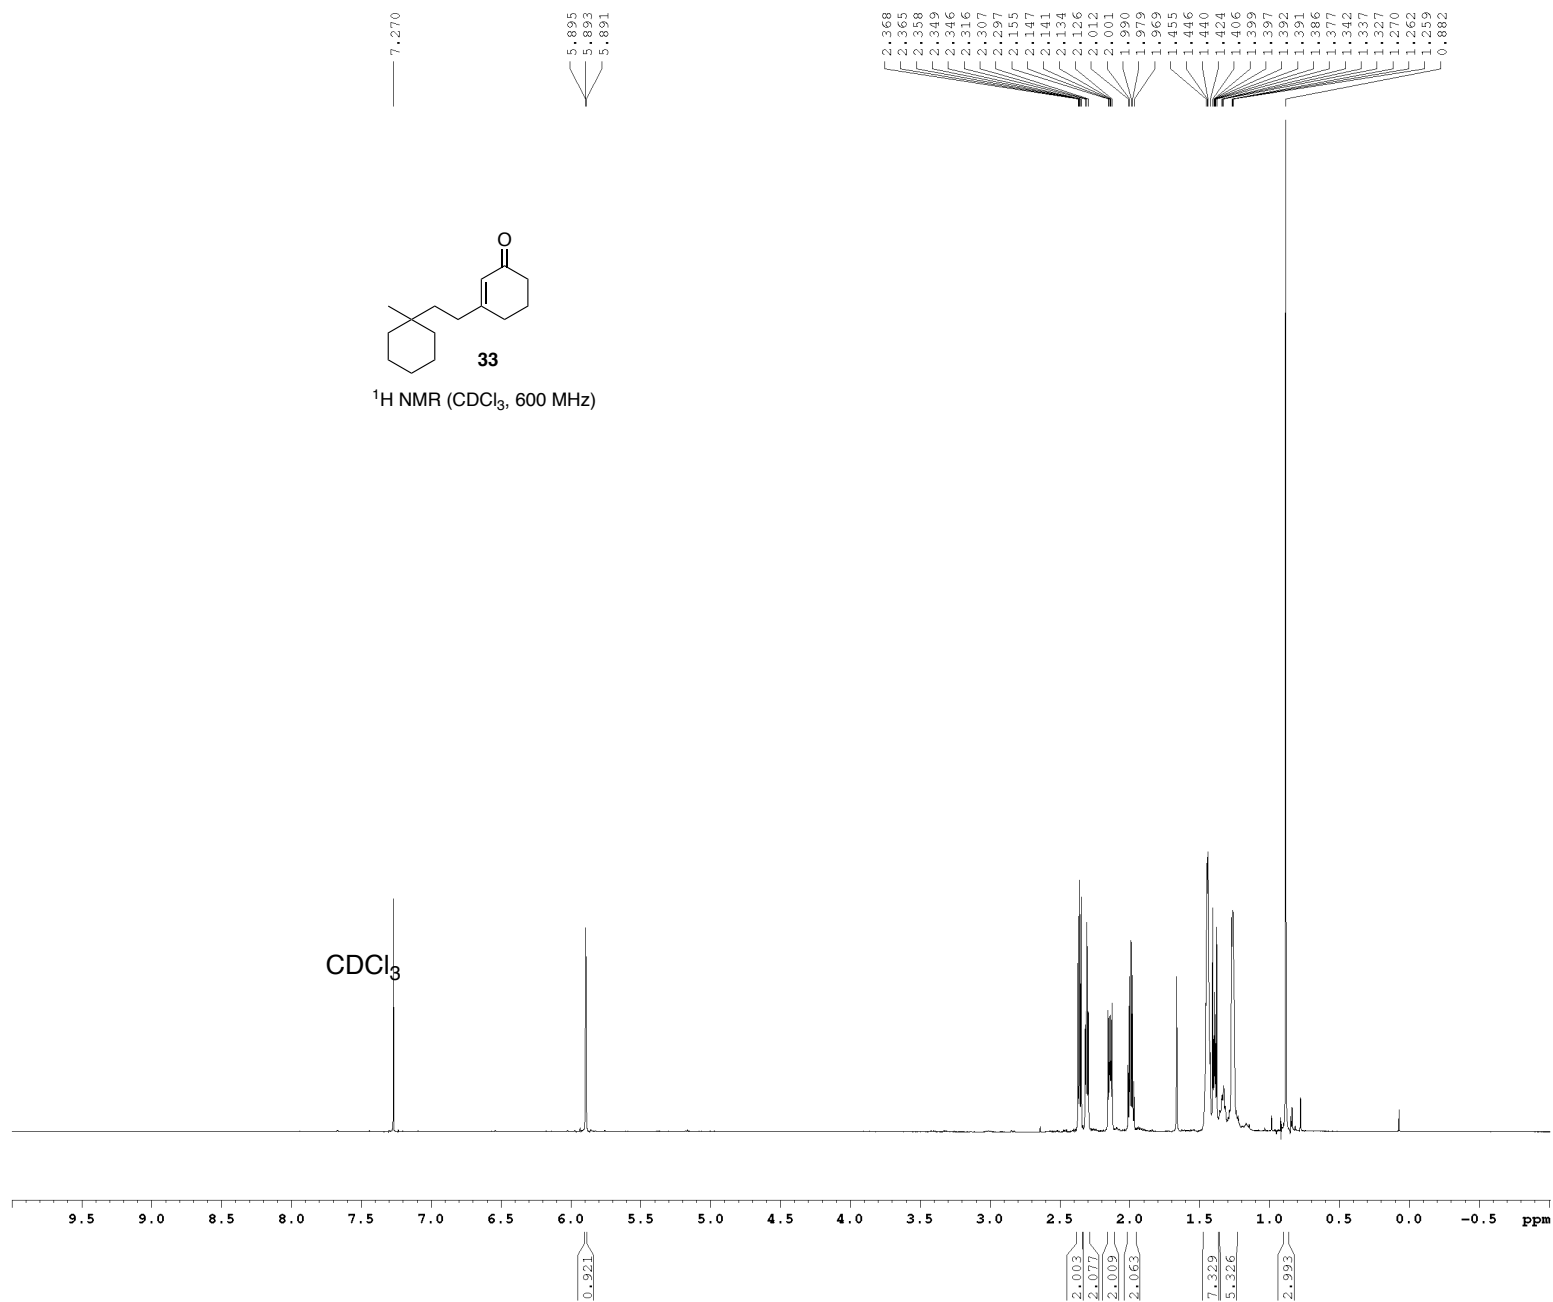

Current Data Parameters  
NAME PZ-2097-P  
EXPNO 1  
PROCNO 1  
DATPATH /v/data/zhaop3/nmr

F2 - Acquisition Parameters  
Date\_ 20170304  
Time 16.42  
INSTRUM av600  
PROBHD 5 mm CPBBO BB-  
PULPROG zg30  
TD 98074  
SOLVENT CDCl<sub>3</sub>  
NS 8  
DS 2  
SWH 9615.385 Hz  
FIDRES 0.098042 Hz  
AQ 5.0998478 sec  
RG 10  
DW 52.000 usec  
DE 13.70 usec  
TE 298.0 K  
D1 0.10000000 sec  
TD0 1

===== CHANNEL f1 =====  
SFO1 600.1342009 MHz  
NUC1 1H  
P1 12.00 usec  
PLW1 20.00000000 W

F2 - Processing parameters  
SI 65536  
SF 600.1300297 MHz  
WDW EM  
SSB 0  
LB 0.30 Hz  
GB 0  
PC 1.00

# **<sup>13</sup>C spectrum with <sup>1</sup>H decoupling**

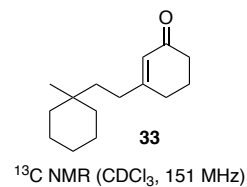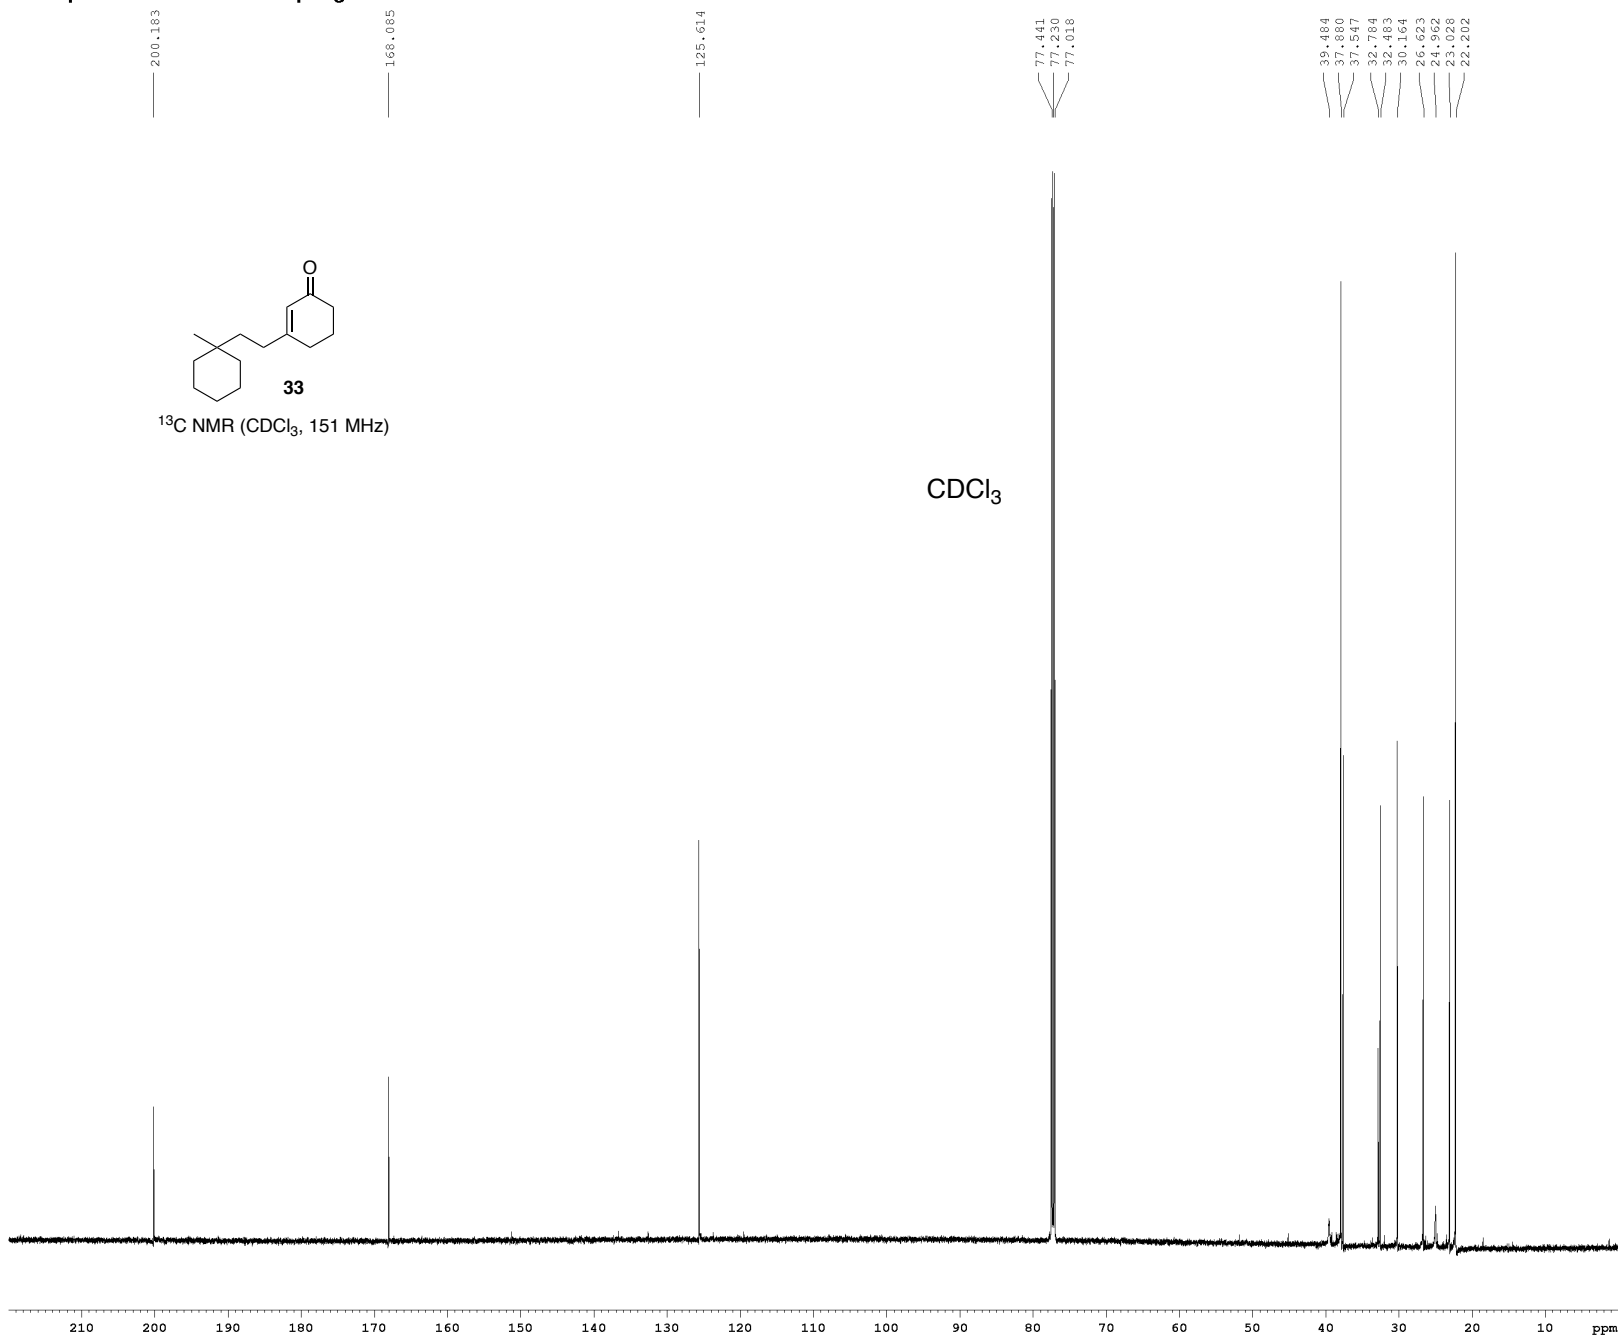

Current Data Parameters

NAME F2-2097-P  
 EXPNO 3  
 PROCNO 1  
 DATPATH /v/data/zhaop3/nmr

F2 - Acquisition Parameters

Date\_ 20170305  
 Time 15.42  
 INSTRUM av600  
 PROBHD 5 mm CPBBO BB-  
 PULPROG zgpg30  
 TD 65536  
 SOLVENT CDCl3  
 NS 290  
 DS 4  
 SWH 36231.883 Hz  
 FIDRES 0.552855 Hz  
 AQ 0.9043968 sec  
 RG 2050  
 DW 13.800 usec  
 DE 19.65 usec  
 TE 298.0 K  
 D1 0.40000001 sec  
 D11 0.03000000 sec  
 TD0 1

===== CHANNEL f1 =====

SFO1 150.9194080 MHz  
 NUC1 13C  
 P1 10.00 usec  
 PLW1 64.00000000 W

===== CHANNEL f2 =====

SFO2 600.1330010 MHz  
 NUC2 1H  
 CPDPRG2 waltz16  
 EPCD2 80.00 usec  
 PLW2 20.00000000 W  
 PLW12 0.36000001 W

F2 - Processing parameters

SI 65536  
 SF 150.9027838 MHz  
 WDW EM  
 SSB 0  
 LB 1.00 Hz  
 GB 0  
 PC 1.00

<sup>1</sup>H spectrum

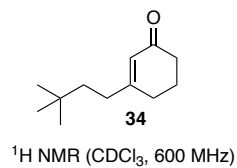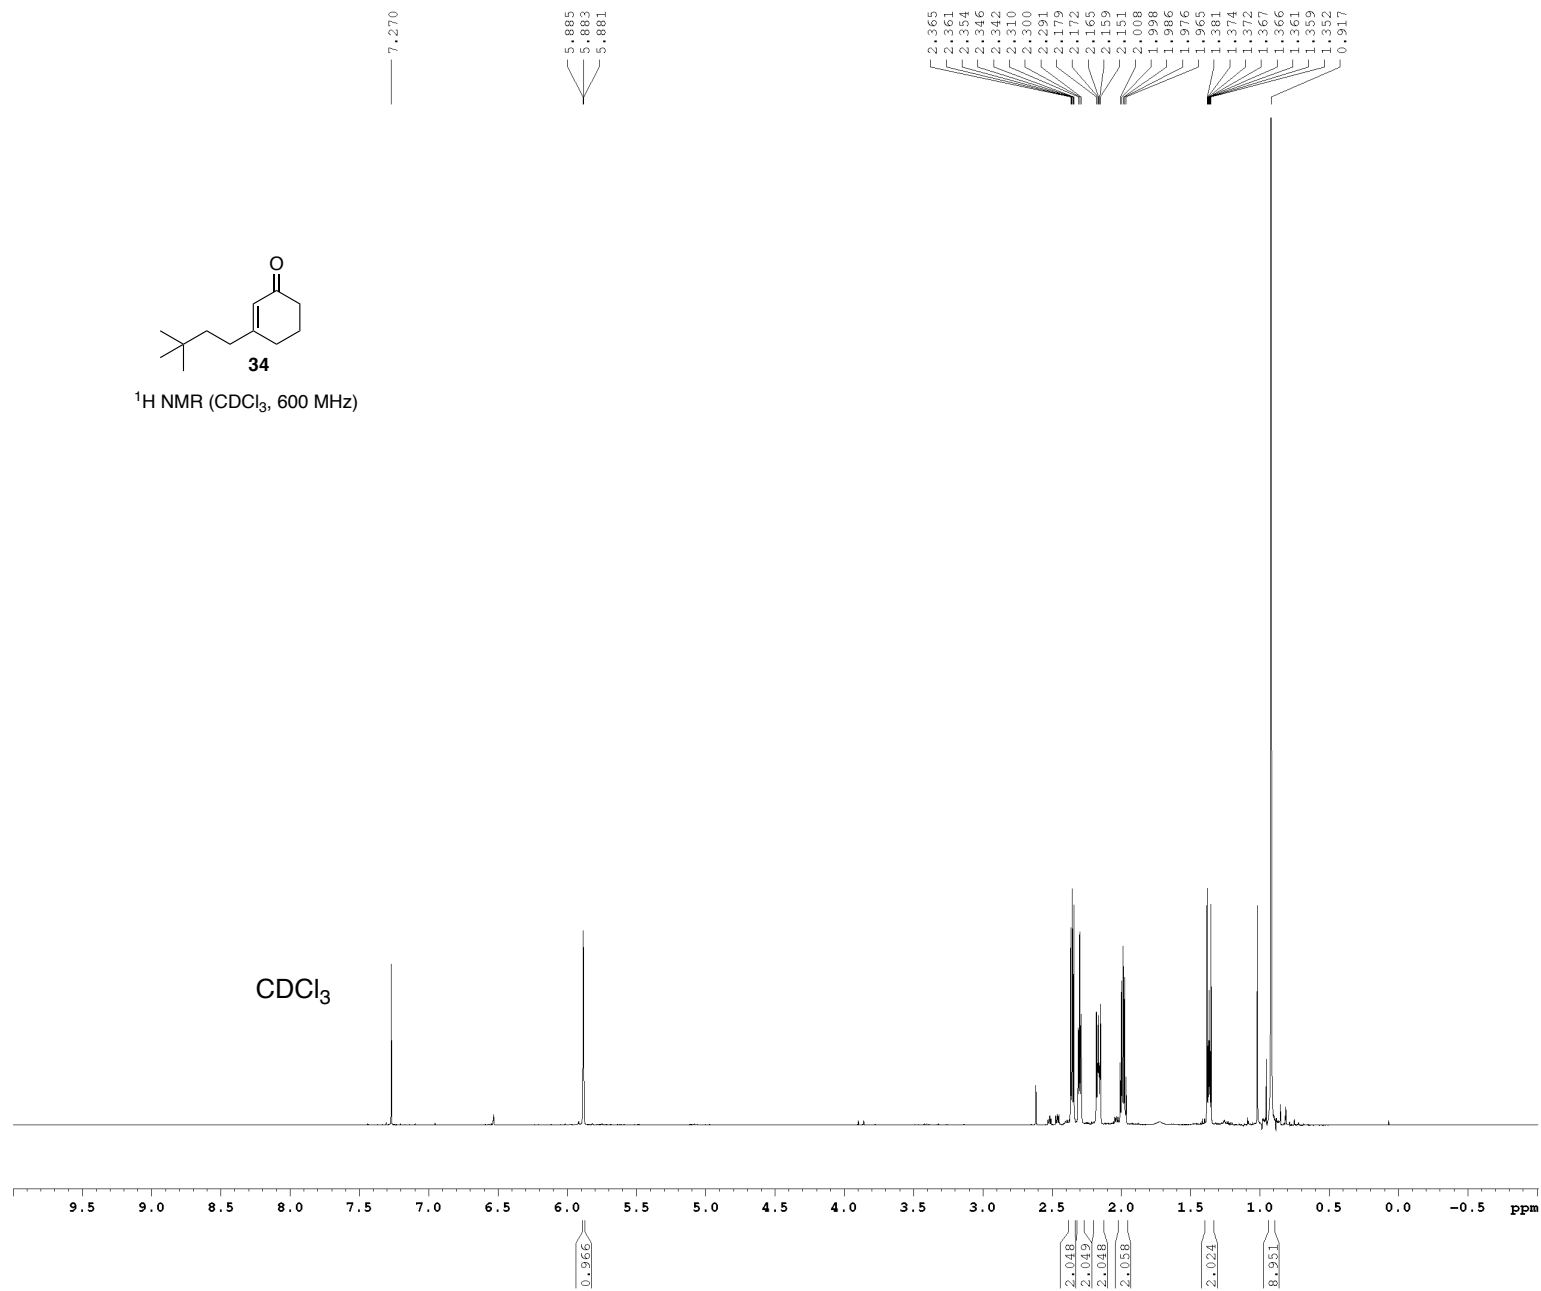

Current Data Parameters

NAME FZ-2102-P

EXPNO 1

PROCNO 1

DATPATH /v/data/zhaop3/nmr

F2 - Acquisition Parameters

Date\_ 20170307

Time 17.29

INSTRUM av600

PROBHD 5 mm CPBBO BB-

PULPROG zg30

TD 98074

SOLVENT CDC13

NS 8

DS 2

SWH 9615.385 Hz

FIDRES 0.098042 Hz

AQ 5.0998478 sec

RG 40.3

DW 52.000 usec

DE 13.70 usec

TE 298.0 K

D1 0.10000000 sec

TD0 1

===== CHANNEL f1 =====

SFO1 600.1342009 MHz

NUC1 1H

P1 12.00 usec

PLW1 20.00000000 W

F2 - Processing parameters

SI 65536

SF 600.1300296 MHz

WDW EM

SSB 0

LB 0.30 Hz

GB 0

PC 1.00

# **<sup>13</sup>C spectrum with <sup>1</sup>H decoupling**

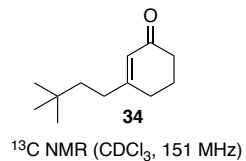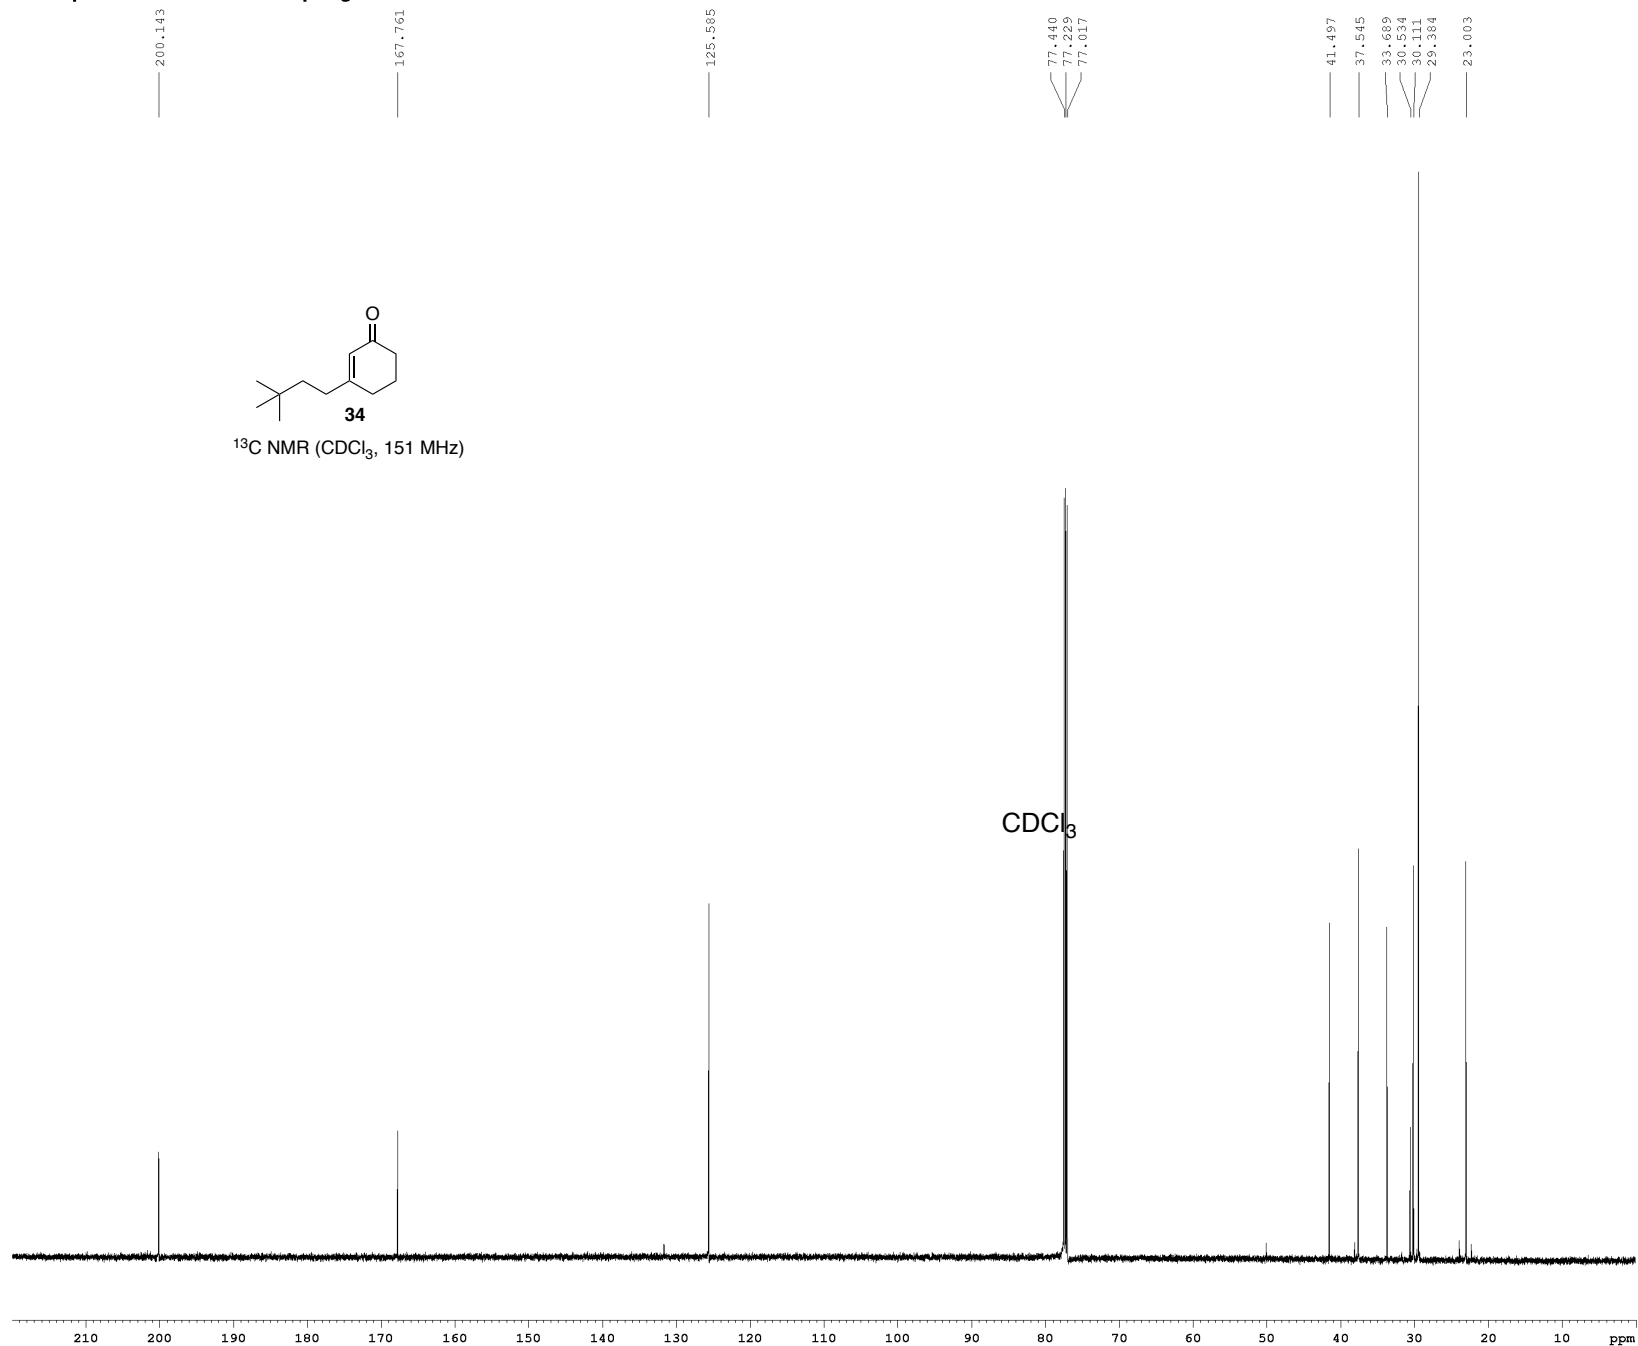

```

Current Data Parameters
NAME      F2-2102-F
EXPNO     2
PROCNO    1
DATPATH   /v/data/zhaop3/nmr

F2 - Acquisition Parameters
Date_     20170307
Time      17.37
INSTRUM   av600
PROBHD    5 mm CPBBO BB-
PULPROG   zgpg30
TD         65536
SOLVENT   CDCl3
NS         46
DS         4
SWH        36231.883 Hz
FIDRES     0.552855 Hz
AQ         0.9043968 sec
RG         2050
DW         13.800 usec
DE         19.65 usec
TE         298.0 K
D1         0.40000001 sec
D11        0.03000000 sec
TDO        1

===== CHANNEL f1 =====
SF01      150.9194080 MHz
NUC1       13C
P1         10.00 usec
PLW1       64.00000000 W

===== CHANNEL f2 =====
SF02      600.1330010 MHz
NUC2       1H
CPDPRG2    waltz16
PCPD2      80.00 usec
PLW2       20.00000000 W
PLW12      0.36000001 W

F2 - Processing parameters
SI         65536
SF         150.9027846 MHz
WDW        EM
SSB        0
LB         1.00 Hz
GB         0
PC         1.00
  
```

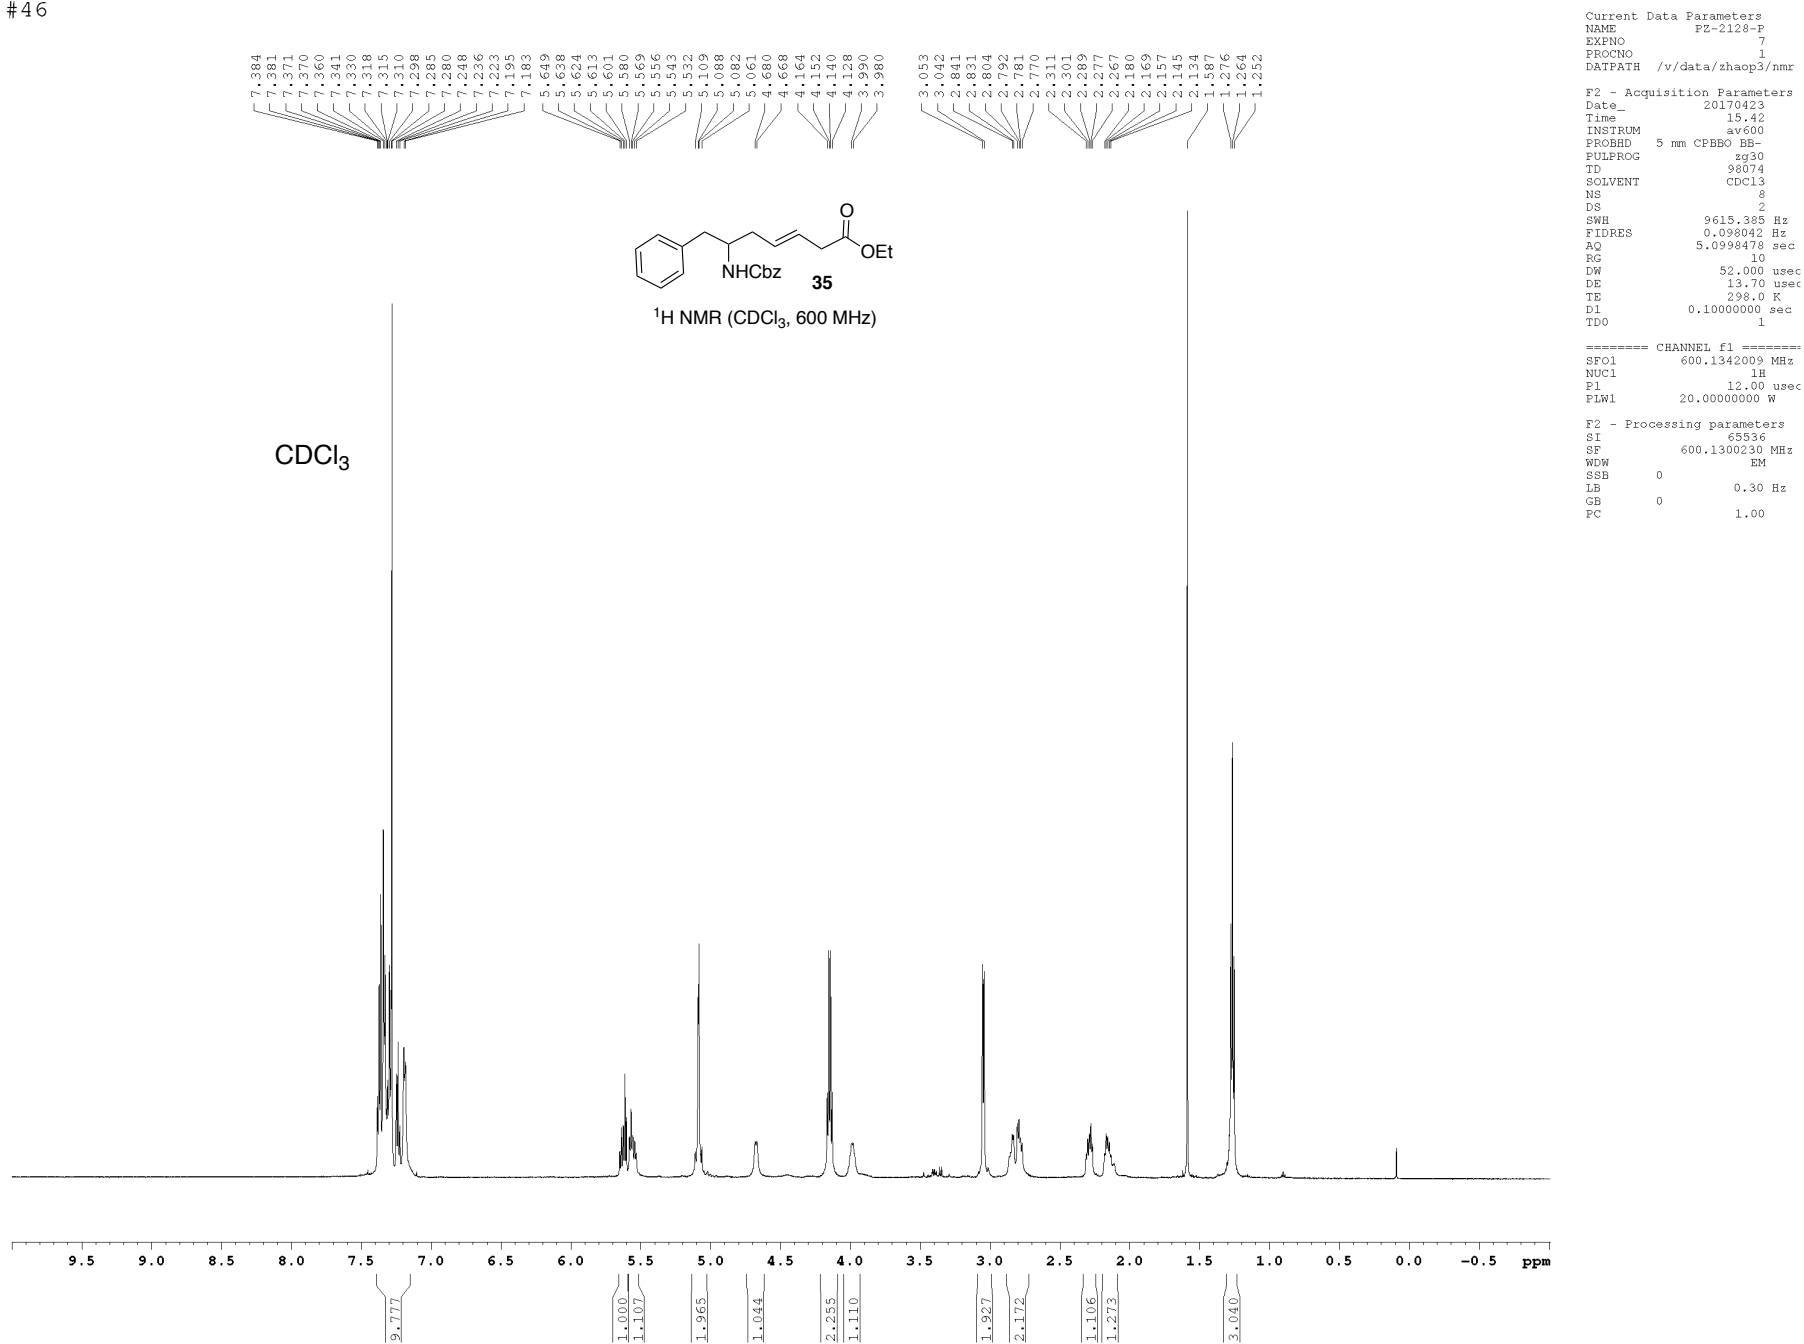

**<sup>13</sup>C spectrum with 1H decoupling**

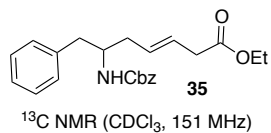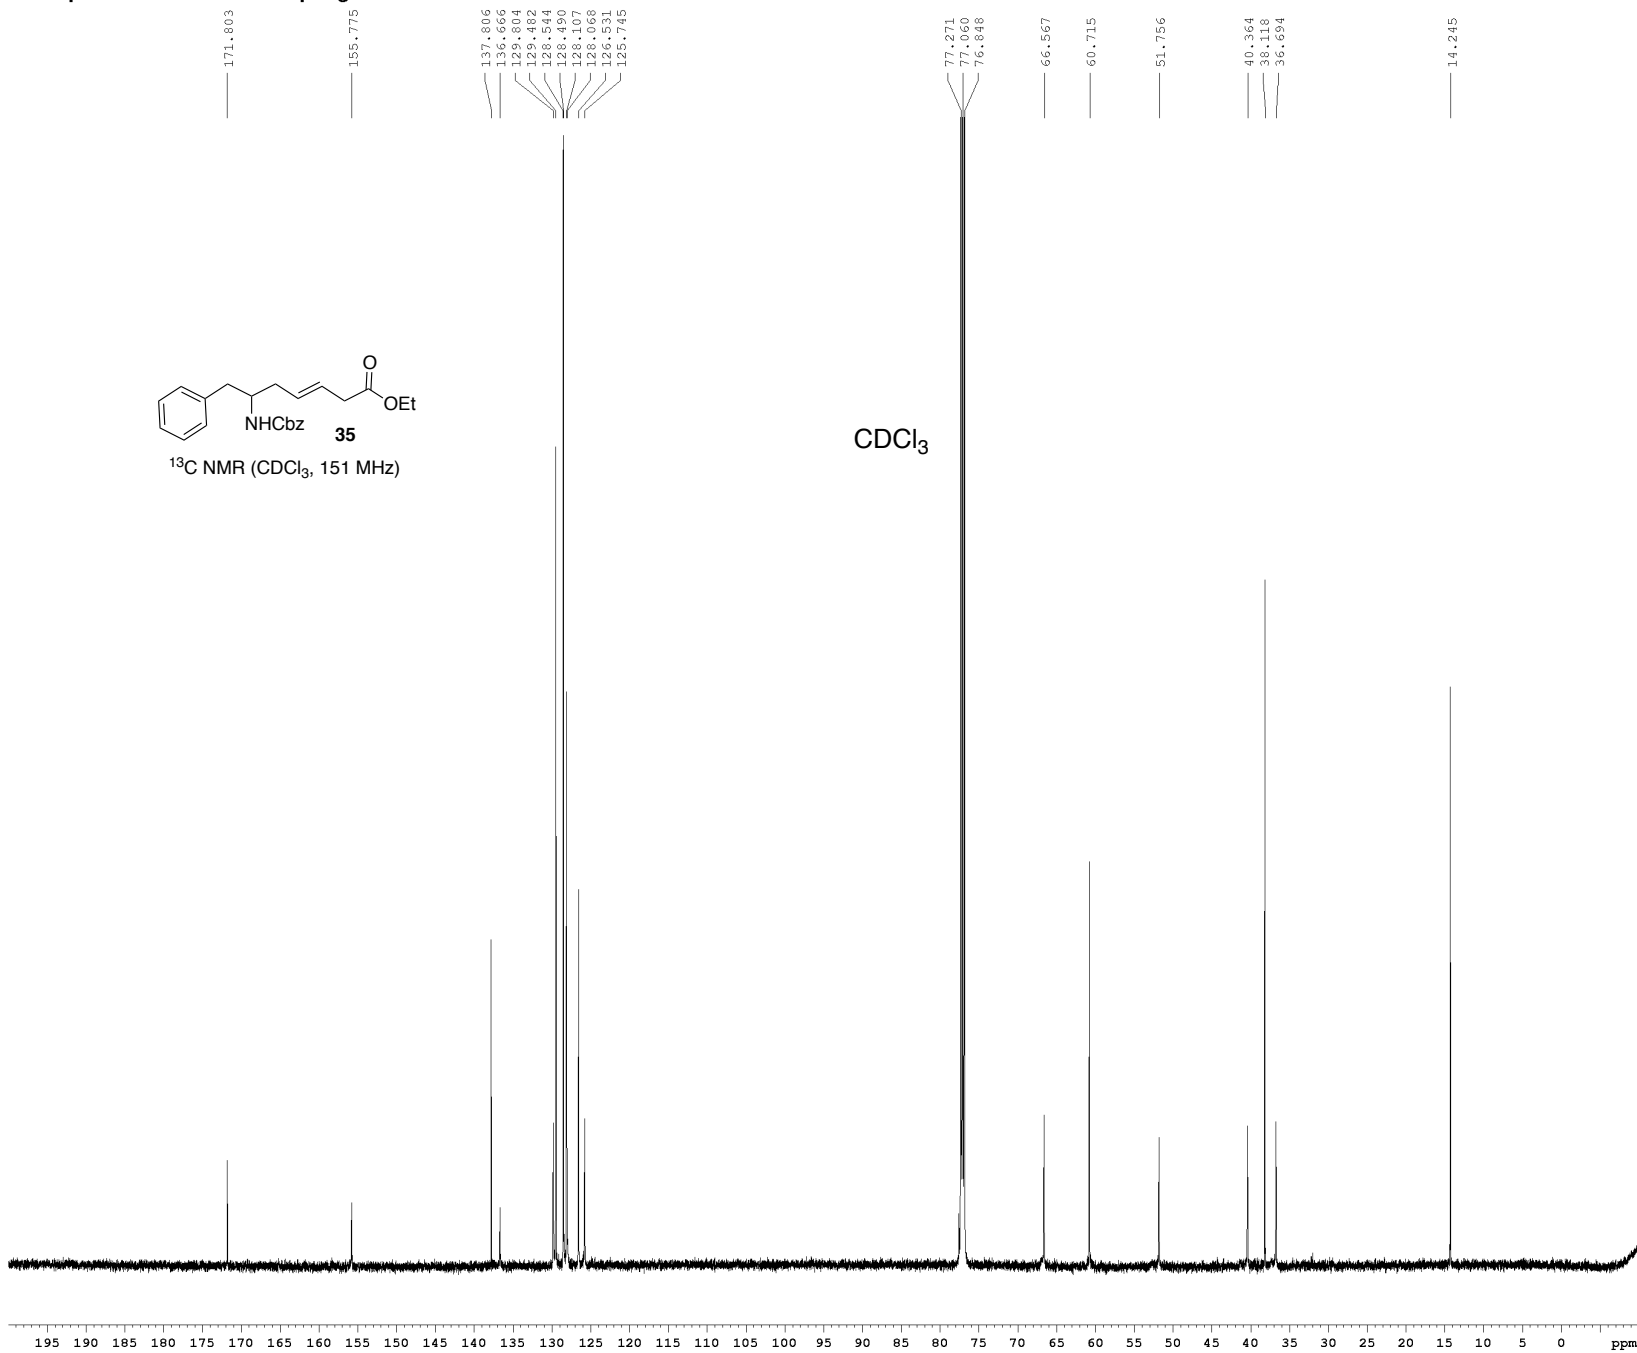

Current Data Parameters

|         |                    |
|---------|--------------------|
| NAME    | P2-2128-P          |
| EXPNO   | 8                  |
| PROCNO  | 1                  |
| DATPATH | /v/data/zhaop3/nmr |

F2 - Acquisition Parameters

|         |                |
|---------|----------------|
| Date_   | 20170423       |
| Time    | 17.09          |
| INSTRUM | av600          |
| PROBHD  | 5 mm CPBBO BB- |
| PULPROG | zgpg30         |
| ID      | 65536          |
| SOLVENT | CDCl3          |
| NS      | 2924           |
| DS      | 4              |
| SWH     | 36231.889 Hz   |
| FIDRES  | 0.552855 Hz    |
| AQ      | 0.9043968 sec  |
| RG      | 2050           |
| DW      | 13.800 usec    |
| DE      | 19.65 usec     |
| TE      | 298.0 K        |
| D1      | 0.40000001 sec |
| D11     | 0.03000000 sec |
| TDO     | 1              |

===== CHANNEL f1 =====

|      |                 |
|------|-----------------|
| SFO1 | 150.9194080 MHz |
| NUC1 | 13C             |
| P1   | 10.00 usec      |
| PLW1 | 64.00000000 W   |

===== CHANNEL f2 =====

|         |                 |
|---------|-----------------|
| SFO2    | 600.1330010 MHz |
| NUC2    | 1H              |
| CPDPRG2 | waltz16         |
| PCPD2   | 80.00 usec      |
| PLW2    | 20.00000000 W   |
| PLW12   | 0.36000001 W    |

F2 - Processing parameters

|     |                 |
|-----|-----------------|
| SI  | 65536           |
| SP  | 150.9028085 MHz |
| WDW | EM              |
| SSB | 0               |
| LB  | 1.00 Hz         |
| GB  | 0               |
| PC  | 1.00            |

<sup>1</sup>H spectrum

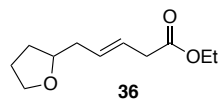

<sup>1</sup>H NMR (CDCl<sub>3</sub>, 600 MHz)

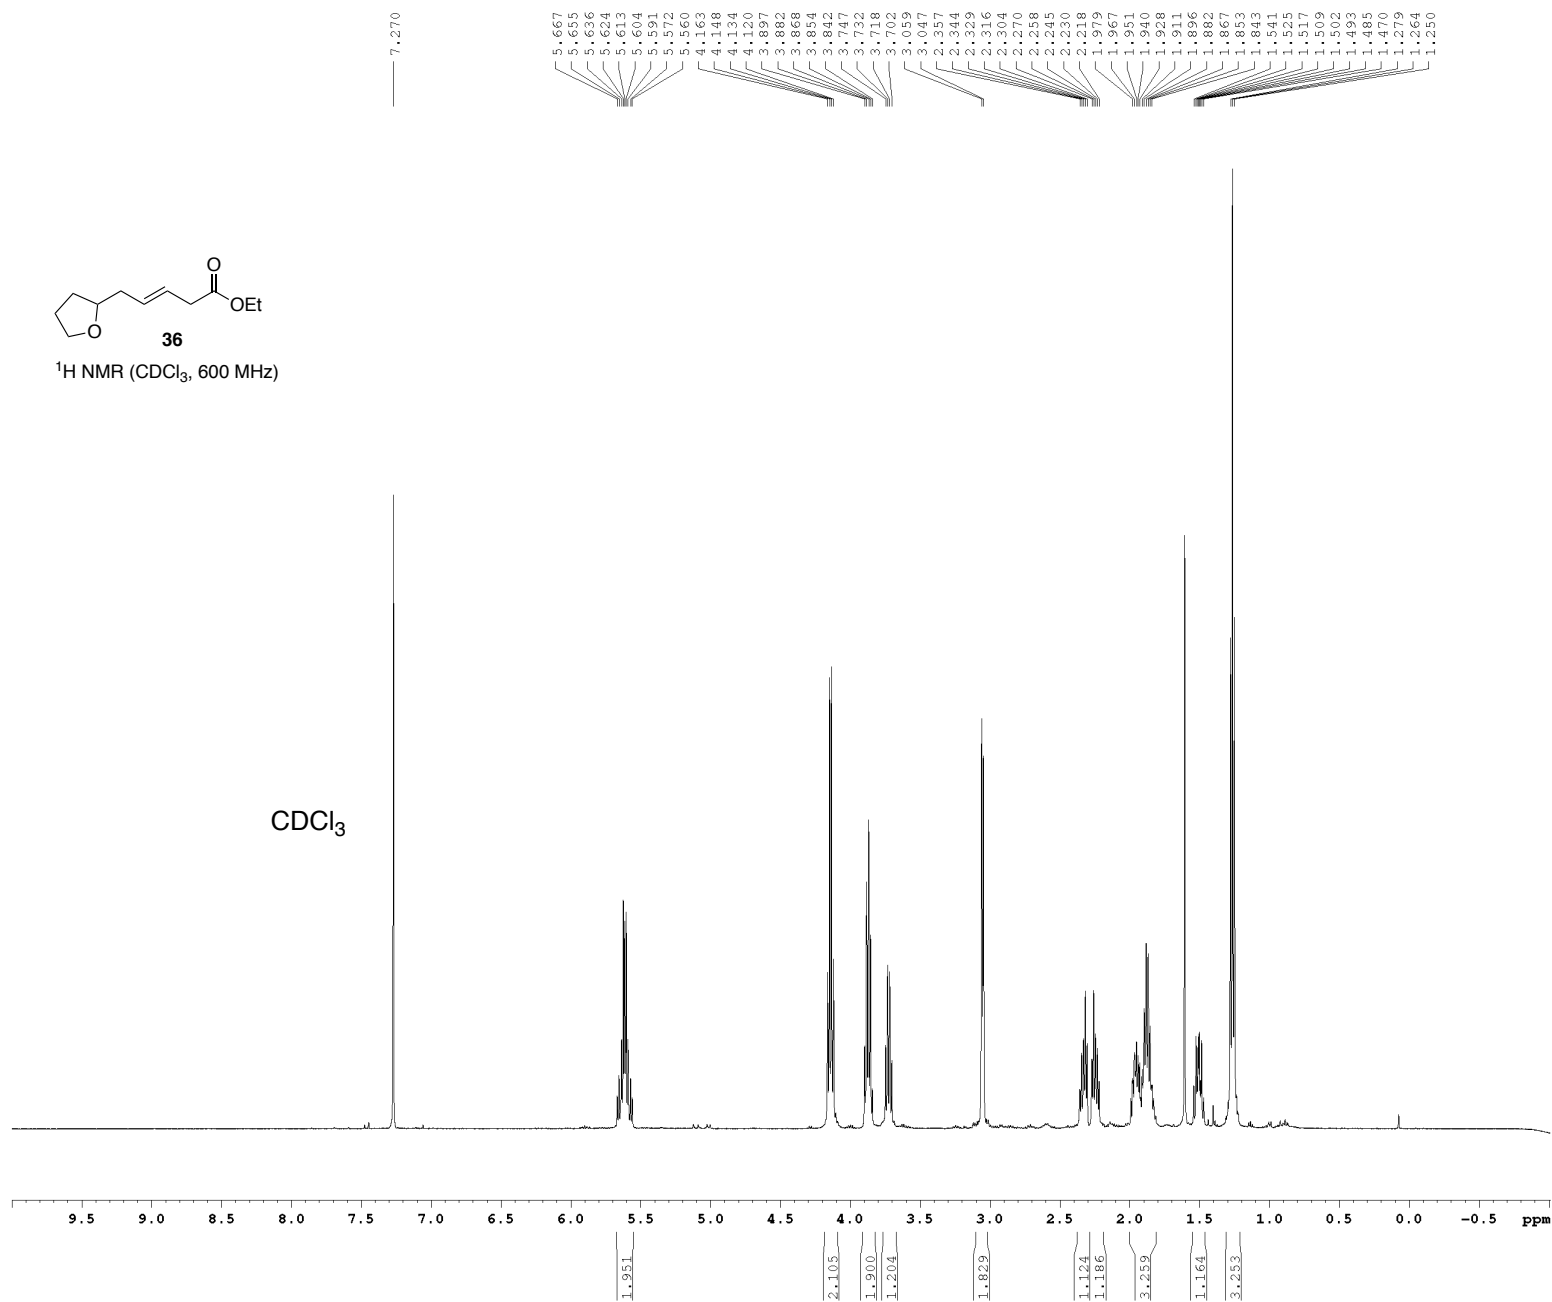

Current Data Parameters  
NAME PZ-2129-#17  
EXPNO 1  
PROCNO 1  
DATPATH /v/data/zhaop3/nmr

F2 - Acquisition Parameters  
Date\_ 20170405  
Time 12.09  
INSTRUM cryo500  
PROBHD 5 mm CPTCI 1H-  
PULPROG zg30  
TD 81728  
SOLVENT CDCl3  
NS 8  
DS 2  
SWH 8012.820 Hz  
FIDRES 0.098043 Hz  
AQ 5.0998273 sec  
RG 8  
DW 62.400 usec  
DE 6.00 usec  
TE 298.0 K  
D1 0.10000000 sec  
MCREST 0 sec  
MCWRK 0.01500000 sec

===== CHANNEL f1 =====  
NUC1 1H  
P1 7.50 usec  
PL1 1.60 dB  
SFO1 500.2235015 MHz

F2 - Processing parameters  
SI 65536  
SF 500.2200269 MHz  
WDW EM  
SSB 0  
LB 0.30 Hz  
GB 0  
PC 1.00



# Z-restored spin-echo 13C spectrum with 1H decoupling

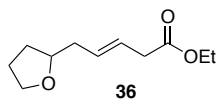

<sup>13</sup>C NMR (CDCl<sub>3</sub>, 151 MHz)

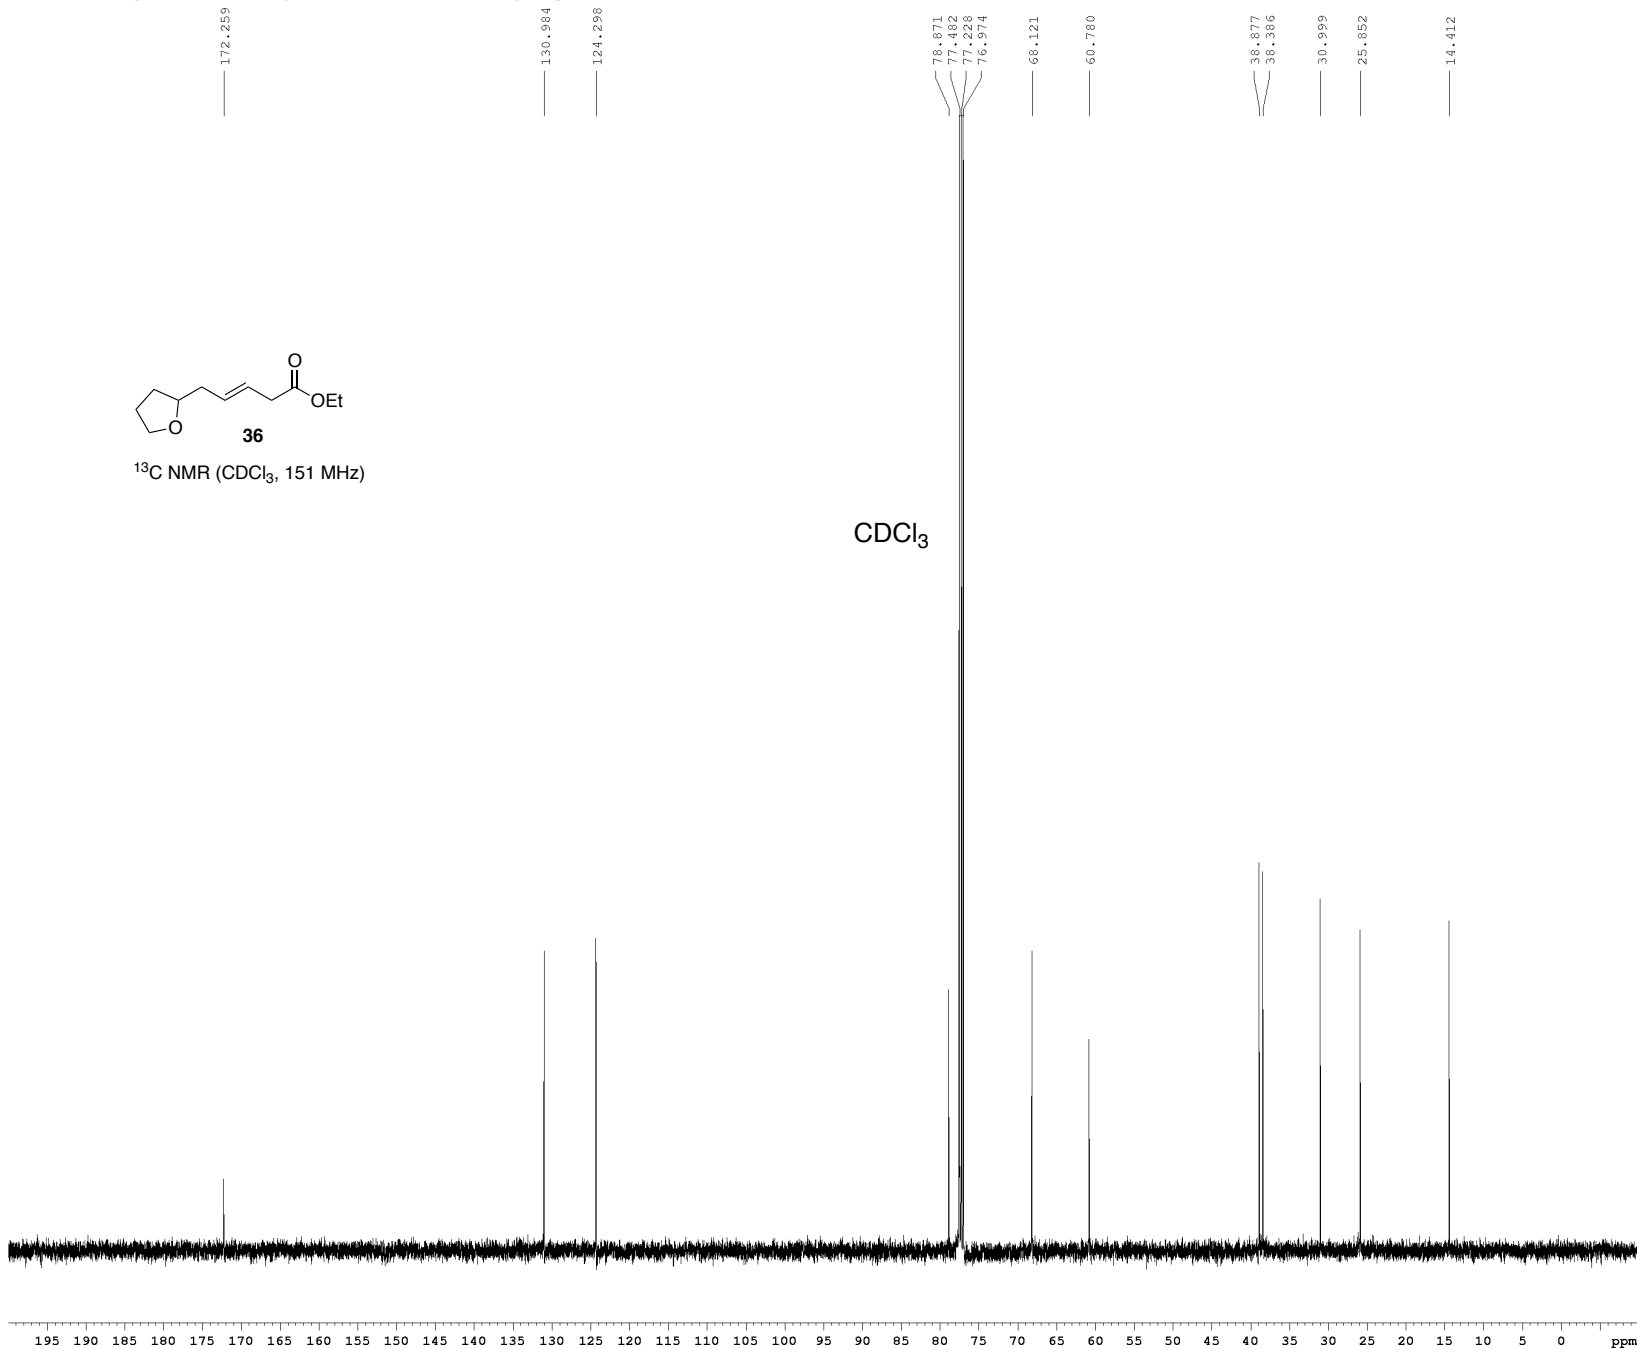

```

Current Data Parameters
NAME      P2-2129-P
EXPNO     111
PROCNO    1
DATPATH   /v/data/zhaop3/nmr

P2 - Acquisition Parameters
Date_     20170418
Time      15.45
INSTRUM   cryo500
PROBHD    5 mm CPTCI 1H-
PULPROG   SpinEchopg30gp.prd
TD         65536
SOLVENT   cdcl3
NS         562
DS         16
SWH        30303.031 Hz
FIDRES     0.462388 Hz
AQ         1.0813440 sec
RG         919.52
DW         16.500 usec
DE         6.00 usec
TE         298.0 K
D1         0.25000000 sec
d11        0.03000000 sec
D16        0.00020000 sec
d17        0.00019600 sec
MCWST      0 sec
MCWRK      0.01500000 sec
P2         33.10 usec

===== CHANNEL f1 =====
NUC1       13C
P1         16.55 usec
P11        500.00 usec
P12        2000.00 usec
PL0        120.00 dB
PL1        -1.00 dB
SFO1       125.7942548 MHz
SF1        2.70 dB
SF2        2.70 dB
SFOFF1     0 Hz
SFOFF2     0 Hz

===== CHANNEL f2 =====
CPDPRG2    waltz16
NUC2       1H
PCPD2      100.00 usec
PL2        1.60 dB
PL12       24.50 dB
SFO2       500.2225011 MHz

===== GRADIENT CHANNEL =====
GPNAM[1]   SINE.100
GPNAM[2]   SINE.100
GPM1       0 %
GPM2       0 %
GPM3       0 %
GPM4       0 %
GPM5       30.00 %
GPM6       50.00 %
p15        500.00 usec
p16        1000.00 usec

P2 - Processing parameters
SI         65536
SF         125.7803995 MHz
WDW        EM
SSB        0
LB         1.00 Hz
GB         0
PC         2.00
    
```

<sup>1</sup>H spectrum @ 70oC

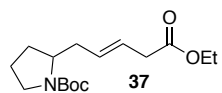

<sup>1</sup>H NMR (C<sub>6</sub>D<sub>6</sub>, 600 MHz)

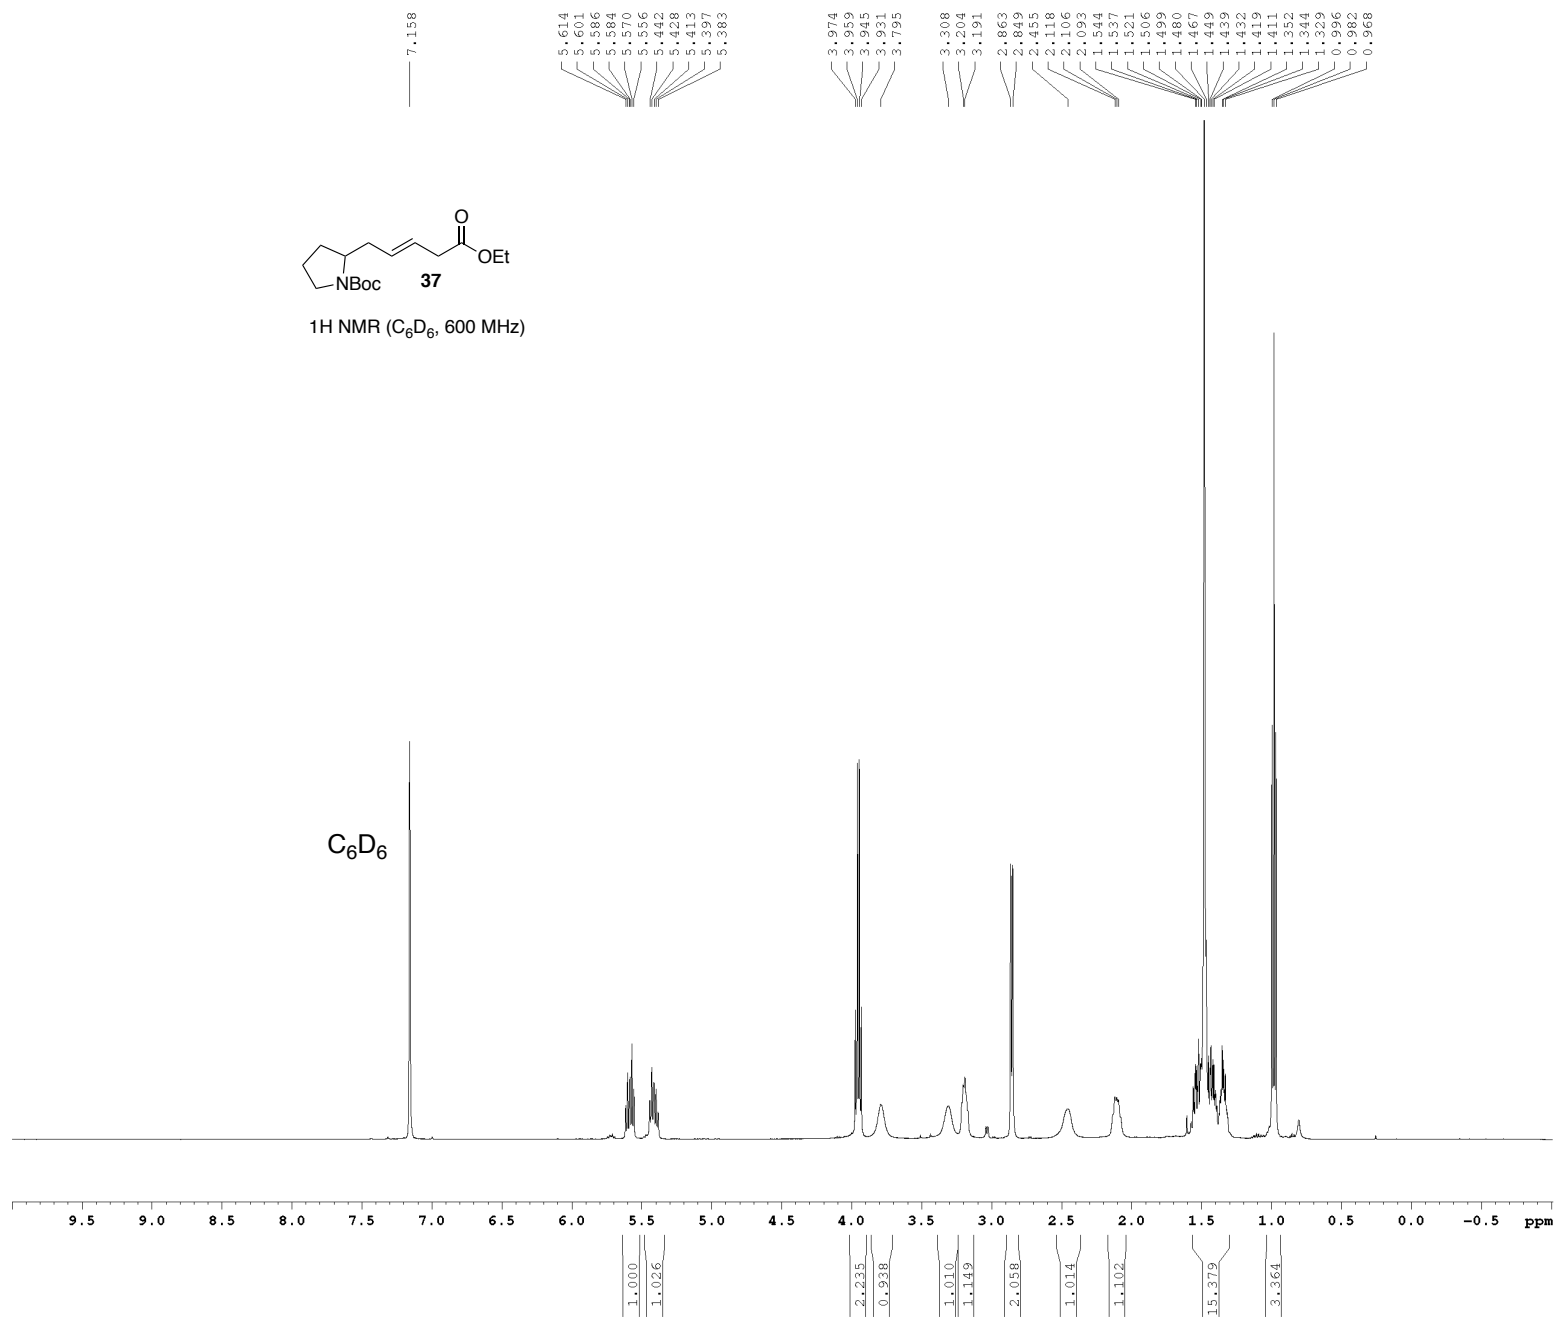

Current Data Parameters  
NAME PZ-2126-P  
EXPNO 7  
PROCNO 1  
DATPATH /v/data/zhaop3/nmr

F2 - Acquisition Parameters  
Date\_ 20170417  
Time 15.54  
INSTRUM gn500  
PROBHD 5 mm broadband  
PULPROG zg30  
TD 81728  
SOLVENT C6D6  
NS 8  
DS 2  
SWH 8012.820 Hz  
FIDRES 0.098043 Hz  
AQ 5.0998273 sec  
RG 90.5  
DW 62.400 usec  
DE 6.00 usec  
TE 343.0 K  
D1 0.10000000 sec  
MCREST 0 sec  
MCWRK 0.01500000 sec

===== CHANNEL f1 =====  
NUC1 1H  
P1 12.00 usec  
PL1 -5.80 dB  
SFO1 499.0734935 MHz

F2 - Processing parameters  
SI 65536  
SF 499.0700000 MHz  
WDW EM  
SSB 0  
LB 0.30 Hz  
GB 0  
PC 1.00

**<sup>13</sup>C spectrum with 1H decoupling  
at 70 oC**

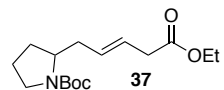

<sup>13</sup>C NMR (C<sub>6</sub>D<sub>6</sub>, 151 MHz)

C<sub>6</sub>D<sub>6</sub>

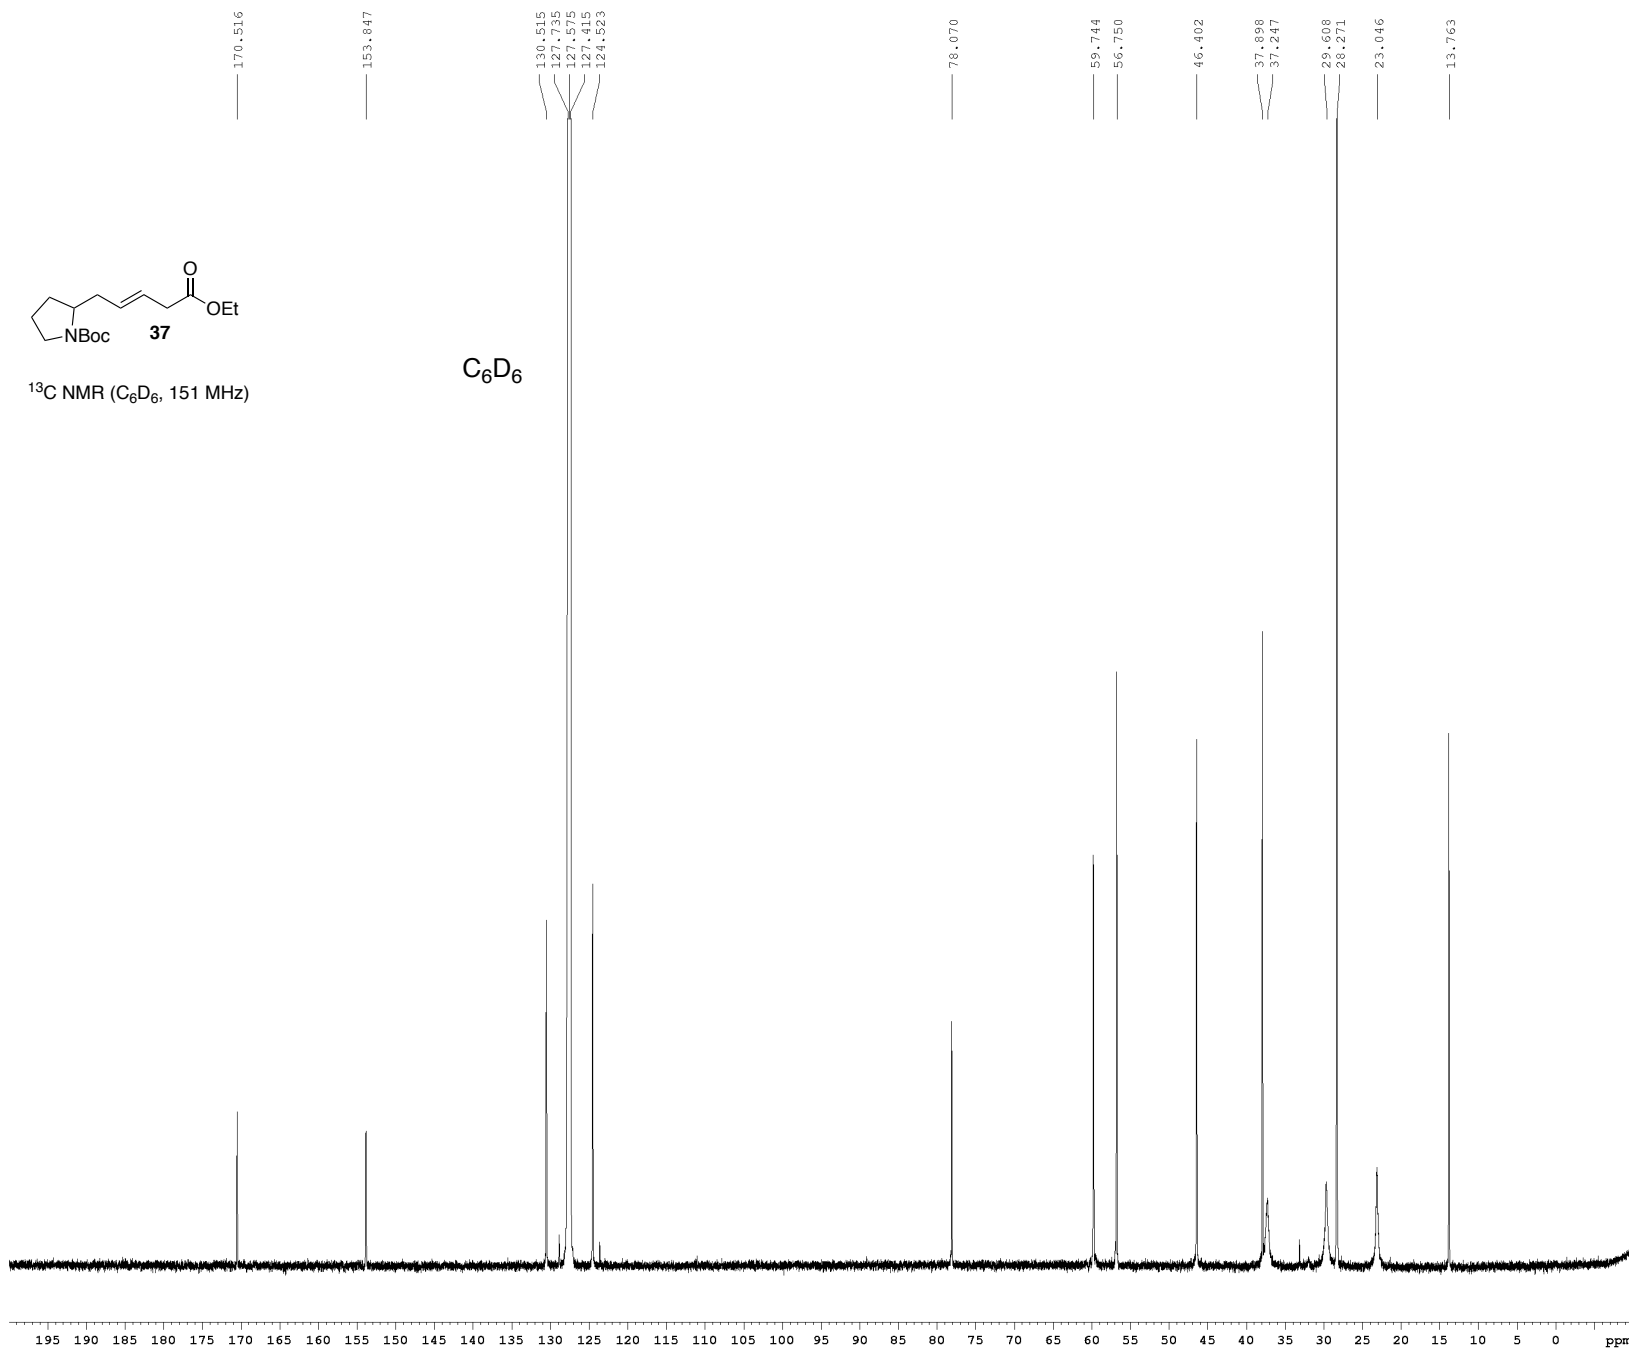

```

Current Data Parameters
NAME      F2-2126-P
EXPNO     3
PROCNO    1
DATAPATH  /v/data/zhaop3/nmr

F2 - Acquisition Parameters
Date_     20170418
Time      16.23
INSTRUM   av600
PROBHD    5 mm CPBBO BB-
PULPROG   zgpg30
TD         65536
SOLVENT   CDCl3
NS         668
DS         4
SWH        36231.883 Hz
FIDRES     0.552855 Hz
AQ         0.9043968 sec
RG         2050
DW         13.800 usec
DE         19.65 usec
TE         343.0 K
D1         0.40000001 sec
D11        0.03000000 sec
TD0        1

===== CHANNEL f1 =====
SFO1      150.9194080 MHz
NUC1       13C
P1        10.00 usec
PLW1      64.00000000 W

===== CHANNEL f2 =====
SFO2      600.1330010 MHz
NUC2       1H
CPDPRG2   waltz16
PCPD2     80.00 usec
PLW2      20.00000000 W
PLW12     0.36000001 W

F2 - Processing parameters
SI         65536
SF         150.9028085 MHz
WDW        EM
SSB        0
LB         1.00 Hz
GB         0
PC         1.00
    
```

## References:

1. (a) Nawrat, C. C.; Jamison, C. R.; Slutskyy, Y.; MacMillan, D. W. C.; Overman, L. E. *J. Am. Chem. Soc.* **2015**, *137*, 11270–11273. (b) Jamison, C. R.; Slutskyy, Y.; Overman, L. E. *Org. Synth.* **2017**, *94*, 167–183.
2. Zhang, H.; Ma, S.; Yuan, Z.; Chen, P.; Xie, X.; Wang, X.; She, X. *Org. Lett.*, **2017**, *19*, 3478–3481.
3. Wender, P. A.; Sieburth, S. McN.; Petratis, J. J.; Singh, S. K. *Tetrahedron*, **1981**, *37*, 3967–3975.
4. Lemarch, A.; Bach, T. *Tetrahedron*, **2004**, *60*, 9659–9673.
5. Rodriguez, J.; Waegell, B. *Synthesis*, **1988**, *7*, 534–535.
6. Takasu, A.; Yamamoto, H.; Inai, Y.; Hirabayashi, T. *Macromolecules*, **2001**, *34*, 6235–6242.
7. Zhang, W.; Ghiviriga, I.; Grenning, A. J. *Tetrahedron*, **2017**, *73*, 4076–4083.
8. Fisher, M. J.; Hehre, W. J.; Kahn, S. D.; Overman, L. E. *J. Am. Chem. Soc.*, **1988**, *110*, 4625–4633.
9. Krasutsky, S. G.; Jacobo, S. H.; Tweedie, S. R.; Krishnamoorthy, R.; Filatov, A. S. *Org. Process Res. Dev.*, **2015**, *19*, 284–289.
10. This sample contained a trace amount (~5%) of the *Z* stereoisomer as seen by the diagnostic small signals for its vinylic carbons in the <sup>13</sup>C NMR spectra.
11. This sample contained ~10% of the *Z* stereoisomer as seen by the diagnostic small signals for its vinylic carbons in the <sup>13</sup>C NMR spectra.
